# Supplementary material
Source: bioRxiv or medRxiv preprint supplement (https://www.biorxiv.org/highwire/filestream/74111/field_highwire_adjunct_files/0/242230-1.pdf)
Supplement: Supplementary file [file 242230-1.pdf]

# 1 The genome of the water strider *Gerris buenoi* reveals expansions of 2 gene repertoires associated with adaptations to life on the water

|    |                                                          |    |
|----|----------------------------------------------------------|----|
| 3  |                                                          |    |
| 4  | <b>Supplementary Data</b> .....                          | 2  |
| 5  | Immune genes .....                                       | 2  |
| 6  | Early Developmental Genes.....                           | 3  |
| 7  | Nuclear receptors and bHLH-PAS proteins .....            | 4  |
| 8  | Insulin/TOR signalling pathways .....                    | 5  |
| 9  | Wnt Signaling Pathway .....                              | 6  |
| 10 | Cysteine peptidases from the papain C1 family .....      | 7  |
| 11 | Visual genes .....                                       | 9  |
| 12 | Chemoreceptor gene families.....                         | 12 |
| 13 | Wing development and polyphenism.....                    | 15 |
| 14 | DNA methyltransferases .....                             | 17 |
| 15 | Histone genes and histone modification machinery .....   | 17 |
| 16 | Antioxidant Proteins .....                               | 19 |
| 17 | <b>Supplementary Methods</b> .....                       | 20 |
| 18 | Bristle genes.....                                       | 22 |
| 19 | Cuticular proteins .....                                 | 22 |
| 20 | Prey detection and selection on water environments ..... | 22 |
| 21 | Wing polyphenism .....                                   | 23 |
| 22 | Wnt Signaling Pathway .....                              | 24 |
| 23 | Early Developmental Genes.....                           | 25 |
| 24 | Antioxidant genes .....                                  | 26 |
| 25 | <b>Supplementary Figures and Tables</b> .....            | 27 |
| 26 | Supplementary Figure 1 .....                             | 27 |
| 27 | Supplementary Figure 2.....                              | 28 |
| 28 | Supplementary Figure 3.....                              | 29 |
| 29 | Supplementary Figure 4.....                              | 32 |
| 30 | Supplementary Figure 5.....                              | 33 |
| 31 | Supplementary Figure 6.....                              | 34 |
| 32 | Supplementary Figure 7.....                              | 35 |
| 33 | Supplementary Figure 8.....                              | 36 |
| 34 | Supplementary Figure 9.....                              | 37 |
| 35 | Supplementary Figure 10.....                             | 38 |
| 36 | Supplementary Table 1 .....                              | 39 |
| 37 | Supplementary Table 2 .....                              | 39 |
| 38 | Supplementary Table 3 .....                              | 40 |
| 39 | Supplementary Table 4 .....                              | 44 |
| 40 | Supplementary Table 5 .....                              | 44 |
| 41 | Supplementary Table 6.....                               | 45 |

|    |                                      |    |
|----|--------------------------------------|----|
| 42 | Supplementary Table 7 .....          | 46 |
| 43 | Supplementary Table 8 .....          | 46 |
| 44 | Supplementary Table 9 .....          | 47 |
| 45 | Supplementary Table 10 .....         | 49 |
| 46 | Supplementary Table 11 .....         | 50 |
| 47 | Supplementary Table 12 .....         | 51 |
| 48 | Supplementary Table 13 .....         | 53 |
| 49 | Supplementary Table 14 .....         | 57 |
| 50 | Supplementary Table 15 .....         | 58 |
| 51 | Supplementary Table 16 .....         | 58 |
| 52 | Supplementary Table 17 .....         | 59 |
| 53 | <b>Supplementary Sequences</b> ..... | 59 |
| 54 | <b>References</b> .....              | 62 |
| 55 |                                      |    |
| 56 |                                      |    |

## 57 **Supplementary Data**

### 58 **Immune genes**

59 While mammals have both innate and adaptive immune response, only innate immune response  
60 has been described in arthropods [1]. In particular, the Toll and IMD (Immunodeficiency) pathways  
61 are the two major regulators of the immune response known in arthropods [2-4] which act by  
62 regulating the expression of other effector molecules such as antimicrobial peptides (AMPs).

63 In the *Gerris buenoi* genome we could annotate more than 60 immune genes, including orthologs  
64 of all components of the Toll signalling pathway, which is activated mainly by Gram-positive  
65 bacteria and fungi [5, 6]. However, whereas the Toll1-4 receptors were only represented by a  
66 single ortholog called Toll1, six Toll9 paralogs were found which raises important questions about  
67 a possible adaptation to gram-positive bacteria present in the water. On the other hand, IMD  
68 pathway responds mainly to Gram-negative bacteria infection [5, 6] but many of its genes,  
69 including *IMD*, *dFADD*, *Dredd*, and *Relish* could not be found in the first sequenced hemipteran,  
70 *Acyrtosiphon pisum* [7, 8]. Further sequencing of other hemipterans extended this absence to the  
71 kissing bug *Rodnius prolixus* and the bed bug *Cimex lectularius*, as well as the pest species  
72 *Diaphorina citri*, *Pachypsylla venusta* and *Halyomorpha halys*. However, among the 60 immune  
73 genes annotated in the genome of *Gerris buenoi*, we could identify a homolog of IMD, a unique  
74 feature amongst sequenced Hemiptera species only shared with recently sequenced true bug  
75 *Oncopeltus fasciatus* (Supplementary Figure 7) [9]. However, like in *Oncopeltus fasciatus*, the  
76 important IMD pathway components *dFADD* and *Kenny* seem to be missing in *Gerris buenoi*.

77 Further research is required to elucidate how the IMD pathway functions in water striders and  
78 why IMD has been conserved in *Gerris* while it has been lost in other hemipterans.  
79 Despite the lack of shared components between Toll and IMD, both pathways can regulate  
80 immune response through regulation of antimicrobial peptides (AMPs). Antimicrobial peptide  
81 (AMPs) families prevent the invasion of potential pathogens playing a fundamental role on innate  
82 immunity [10]. However, AMP families differ greatly among groups of insects [11] and only two  
83 defensin-like, one lysozyme and 6 of the Hemiptera-specific Serosins [12] could be identified. We  
84 failed to identify any attacins, hemiptericins or thaumatins in the *Gerris buenoi* genome. These  
85 results suggest that following Gerromorpha invasion of water environment they have been faced  
86 with a myriad of new potential pathogens, which may have accelerated Gerromorpha's AMPs  
87 divergence.  
88 Finally, we could annotate an ortholog of the innate immune response gene gamma-interferon-  
89 inducible thiol reductase (*gilt*) in *Gerris buenoi* genome. Despite only innate immune response has  
90 been classically described in arthropods, recent studies on *Drosophila melanogaster* have shown  
91 that *gilt* ortholog gene has a role on adaptive immune response in flies [1]. However, the exact  
92 mechanism of *gilt* function in immune response remains unknown. Moreover, in water striders  
93 including *Gerris buenoi*, although no immune role of *gilt* has been tested yet, knockdown analyses  
94 using RNA interference have shown an important new role in leg growth and adaptation [13].  
95 These findings raise interesting questions about the functional divergence of arthropod immune  
96 system.

97

### 98 **Early Developmental Genes**

99 One of the main reasons for choosing to sequence the *Gerris buenoi* genome was due to its  
100 emerging status as a developmental model system [14]. Therefore, it was of particular interest to  
101 analyze its developmental gene content. In total 24 genes that are known, in other insects, to be  
102 involved in developmental processes were manually annotated (Supplementary Table 10). These  
103 include both genes encoding transcription factors and members of signaling pathways. These  
104 genes are identified and named as distinct development genes by the nomenclature from  
105 *Drosophila melanogaster* (Supplementary Table 11). *Gerris buenoi* has evidence of a canonical  
106 insect developmental pathway and can be expected to contain all components required to  
107 establish a normal anterior/posterior axis pattern. Compared to the later acting genes, the early  
108 developmental genes identified in *Gerris buenoi* show greater divergence from those found in

109 *Drosophila melanogaster* and *Tribolium castaneum* (Supplementary Table 12), consistent with  
 110 observations between *Drosophila* species [15]. Developmental genes previously identified in  
 111 *Limnopus dissortis* (e.g. *decapentaplegic*) were also identified in the *Gerris buenoi* genome [16]  
 112 confirming the presence of canonical insect developmental toolkit in this species. No duplication in  
 113 the early development genes was observed. Early patterning genes appear conserved from what is  
 114 known in other insects. As expected, there is no *bicoid* orthologue. Other genes known in  
 115 *Drosophila* but not found in other insects, such as swallow are also not found in *Gerris*, such is the  
 116 case of *caudal*. However, we suspect due to the identification of *tailless* that the absence of *caudal*  
 117 from the genome is due to incomplete coverage of the sequencing effort, rather than an actual  
 118 absence of the gene in the genome. We identified gene models for the terminal patterning genes  
 119 *torso*, and *torso-like* in *Gerris buenoi*. Although models homologous to PTH were identified they  
 120 were not well supported. However, is it more than likely that *Gerris buenoi* possess a PTH  
 121 orthologue given that PTH orthologues are found in other hemipterans. As with other Hemiptera,  
 122 we could not find a model for *trunk*.

123

#### 124 **Nuclear receptors and bHLH-PAS proteins**

125 We have annotated the genome of *Gerris buenoi* for all the genes of two families of ligand-  
 126 dependent transcription factors: nuclear receptors and bHLH-PAS proteins. These regulators share  
 127 many characteristics, such as response to small lipophilic ligands that can act either as signalling  
 128 molecules or as xenobiotics and heterodimerisation factors with other members of their family.  
 129 Numerous cross-talk interactions are known between nuclear receptors and bHLH-PAS proteins.  
 130 All but one of the 21 nuclear receptor genes expected for an insect were found in the genome of  
 131 *Gerris buenoi*. The missing gene E78 is also absent in *Pediculus humanus* [17] but is present in the  
 132 genome of *Acyrtosiphon pisum* [18, 19]. We found 3 NR0 genes (*knirps*-related, *eagle*), as in  
 133 *Pediculus humanus* and *Apis mellifera* [20]. Based on the work of [21], we could also identify all  
 134 the isoforms of ECR and NR2E6 genes.

135 The genome of *Gerris buenoi* contains at least 10 genes of the bHLH-PAS family. The gene *tango*  
 136 (*tgo*) was not found, whereas it is present in the genome of the *Acyrtosiphon pisum* [22]. This  
 137 absence is surprising, since *tgo* is the homolog of ARNT, which is the heterodimeric partner of  
 138 several members of this family in mammals. Since the gene called «*germ cell-expressed*» (*gce*) in  
 139 *Drosophila* is known to be a diptera specific duplication of *Methoprene-tolerant* (*Met*), its absence  
 140 in the genome of *Gerris buenoi* was expected. The gene *single-minded* (*sim*) is duplicated, as in

141 *Tribolium castaneum* [23].

142 In conclusion, we found a strong conservation of the number and identity of nuclear receptors and  
143 bHLH-PAS proteins with other insects.

144

#### 145 **Insulin/TOR signalling pathways**

146 The Insulin and TOR pathways function together as an integrated metabolic signalling pathway  
147 that is known to coordinate hormonal and nutritional signals in developing animals [24-26]. This  
148 facilitates the complex regulation of several fundamental molecular and cellular processes  
149 including transcription [27, 28], translation, cell stress, autophagy, and physiological states,  
150 including aging, starvation, hormonal regulation, as well as both organism-wide and tissue-specific  
151 growth [26-31]. In insects, these pathways have been implicated in the developmental regulation  
152 of complex nutrient-dependent phenotypes ranging from beetle horns to the social castes of  
153 termites and bees [32-34]. For example, in beetles, the insulin receptor is known to be a critical  
154 regulator of appendage growth and it has been proposed that downstream transcription factors of  
155 the pathway (Foxo), can mediate organ-specific sizing and growth [35, 36]. Taken together, the  
156 interplay between these two pathways may play an integral role in the growth and sizing of the  
157 different legs, and perhaps, even sexually dimorphic sized appendages found across the  
158 morphologically diverse array of water strider species. For this reason, we searched for and  
159 annotated various key players of this pathway. We found that *Gerris buenoi* possesses all  
160 components of this pathway including the *forkhead box protein O (foxo)*, *insulin receptor 1 (InR1)*,  
161 *insulin receptor 2 (InR2)*, the *insulin receptor substrate Chico*, the negative insulin pathway  
162 regulator *Phosphatase and Tensin homologue (Pten)*, *Rheb/Ras homolog enriched in brain (Rheb)*,  
163 the *S6 kinase (S6k)*, *Target of Rapamycin (Tor)*, the binding protein of the translation initiation  
164 factor eIF4E (*4E-BP/Thor*), *Tuberous sclerosis complex 1 and 2 (Tsc1 & Tsc2/gigas)*, the  
165 phosphoinositide-3-OH-kinase-dependent serine/threonine protein kinase *Akt1/Pkb*, the amino  
166 acid transporter *Slimfast (slif)* and two Phosphoinositide 3-kinases (*Pi3K92E & Pi3K21B*). In  
167 addition to this, *Gerris buenoi* appears to have an additional, third, insulin receptor of unknown  
168 function and no known ortholog in insects. Therefore, the water strider *Gerris buenoi* possesses  
169 the entire Insulin/TOR toolkit, which would be a potential target for future research into nutrient-  
170 dependent differential body-plan growth and evolution in water striders.

171

## 172 **Wnt Signaling Pathway**

173 The Wnt pathway is a signal transduction pathway with fundamental regulatory roles in embryonic  
174 development in all metazoans. The emergence of several gene families of both Wnt ligands and  
175 Frizzled receptors allowed the evolution of complex combinatorial interactions with multiple  
176 layers of regulation [37]. Wnt signalling affects cell migration and segment polarity as well as  
177 segment patterning in most arthropods [38]. Surveying and comparing the gene repertoire of  
178 conserved gene families within and between taxonomic groups is the first step towards  
179 understanding their function during development and evolution.

180 Here we curated gene models for the main components of the Wnt signalling pathway and  
181 confirmed their orthology by phylogenetic analysis. We found 6 Wnt ligand subfamilies, three  
182 Frizzled transmembrane receptor subfamilies, the co-receptor *arrow*, and the downstream  
183 components *armadillo/beta-catenin*, *dishevelled*, *arrow*, *axin*, and *shaggy/GSK-3*. All of these  
184 genes were present in single copy in the assembly.

185 The *Gerris* Wnt ligand repertoire is comparable to other hemipterans and holometabolous insect  
186 species that have been analysed in detail. This supports observations of a reduction in the ligand  
187 repertoire in insects compared to an inferred ancestral complement of 17 subfamilies, with most  
188 extant Metazoan retaining ligands from 11-12 subfamilies. Nevertheless, assessments of gene  
189 absence need to be done with caution when dealing with draft assemblies from second generation  
190 sequencing, which is the case for most recently published genomes.

191 A total of 18 models for the main Wnt signalling genes were curated in the *Gerris buenoi* assembly  
192 (Supplementary Table 13). The gene models generated by the MAKER pipeline were a very good  
193 start for the curation process in most cases, where most of the time only the 5' end of the models  
194 had to be edited by changing the translation start or adding upstream exons. The exceptions to  
195 this were the *dishevelled* isoforms where, despite very strong RNA-seq support for the complete  
196 model, only a small 5-exon model (for a gene with 16 exons in this species) for the middle part of  
197 the gene was present in the automated set. Despite curation, the models of three genes are  
198 incomplete. Similarly, *WntA* was missing the first exon in an upstream gap, and the *armadillo*  
199 model was missing the N-terminal region due to a gap directly upstream of the model. The third  
200 gene, *GSK-3 beta*, was split across two scaffolds despite strong RNA-seq support, with part 2 of  
201 this model filling the complete scaffold 10229 and yet still missing fragments at both ends.

202 All models were isolated on individual scaffolds, with the exception of *axin* and *arrow*.  
203 Interestingly, this linkage is not found in *Drosophila melanogaster*, *Tribolium castaneum*, or other

204 i5k pilot project hemipteroid species surveyed to date. On the other hand, the absence of the  
205 ancient synteny of *wingless-Wnt6-Wnt10* [39], which was wholly or partially confirmed in other i5k  
206 pilot hemipteroid species, is likely due to limitations in the current draft assembly. Regarding gene  
207 copy number, it is worth noting that *armadillo*, which encodes an intracellular transducer in the  
208 Wnt pathway, is represented by a single ortholog in the current assembly. As many insects,  
209 including other heteropterans, have two copies of *armadillo* (*Drosophila*, *Tribolium*, *Cimex*,  
210 *Oncopeltus*), it is surprising that there is no evidence for a second gene in *Gerris*.

211 We identified 6 *Wnt* gene subfamilies in the *Gerris* assembly, all with single copy genes:  
212 *wingless/Wnt1*, *Wnt5*, *Wnt7*, *Wnt8*, *Wnt10* and *WntA*. This is identical to the ligand subfamily  
213 representation in *Oncopeltus fasciatus*, with the slight difference that there has been a duplication  
214 in *Oncopeltus Wnt8* [9]. There were also only six *Wnt* gene subfamilies found in the pea aphid  
215 (*Acyrtosiphon pisum*), although for a slightly different constellation of subfamilies:  
216 *wingless/Wnt1*, *Wnt5*, *Wnt 7*, *Wnt11*, *Wnt16* and *WntA* [19]. Together with earlier observations  
217 [39], this report supports the idea that members of the Hemiptera have the fewest *Wnt* gene  
218 families reported in insects, with some of these losses perhaps having occurred relatively recently  
219 and independently in this clade.

220 Three models were curated for the *frizzled* (*fz*) transmembrane receptor families: *frizzled*, *frizzled*-  
221 *2*, and *frizzled*-*3*. These correspond to three of the four ancient *fz* families expected to have been  
222 present in the common ancestor of arthropods: *fz*, *fz2*, *fz3*, *fz4* [40]. The loss of *fz4* was also  
223 observed in *Oncopeltus fasciatus* [9] and *Acyrtosiphon pisum* [19].

224

### 225 **Cysteine peptidases from the papain C1 family**

226 Cysteine peptidases from the papain C1 family (MEROPS classification [41]) are important  
227 lysosomal cathepsins, and participate as regulators and signaling molecules in a large number of  
228 biological processes [42]. In addition, cysteine cathepsins in a limited number of insect groups are  
229 important digestive enzymes evolved from lysosomal ancestors [43, 44]. In Cucujiformia beetles,  
230 digestive cysteine cathepsins are an evolutionary response to a seed diet rich in serine peptidase  
231 inhibitors [43, 45]. In the case of true bugs, it is proposed that their sap-sucking ancestors lost  
232 digestive serine peptidases in adapting to plant sap, and the adaptation of cysteine cathepsins for  
233 digestive functions is a consequence of a return to a protein diet [46]. A detailed study of cysteine  
234 cathepsins in the beetles *Tenebrio molitor* and *Tribolium castaneum* (Coleoptera: Tenebrionidae)  
235 revealed expansions of genes encoding cysteine digestive cathepsins [47, 48]. Cysteine cathepsins

236 in *T. castaneum* larvae are important components of adaptive responses in overcoming the effect  
237 of dietary protease inhibitors [49].

238 There are few publications of cysteine peptidases in Heteroptera. Most of the early publications  
239 suggested that cysteine peptidases are the major digestive peptidases in several families of this  
240 insect order (see [43, 44]), such as *Reduviidae*, where digestive cathepsins L and B were identified  
241 in two *Triatoma* species [50, 51]. Sequencing the *Rhodnius prolixus* gut transcriptome revealed 11  
242 cysteine peptidases expressed in the gut [52]. We are unaware of any publications on digestive  
243 peptidases of the bugs from the family Gerridae, and the specific biology of this semi-aquatic  
244 insect can impact the set of digestive enzymes.

245 In *Gerris buenoi*, we found 28 genes and gene fragments that encode cysteine cathepsins of the C1  
246 family. These enzymes primarily belong to the cathepsin L-like subfamily [53], while the cathepsin  
247 B-like subfamily was represented by only three potentially active enzymes and one putatively  
248 catalytically inactive TINAL-like protein [54]. Members of the cathepsin L-like family included two  
249 types of peptidase genes: (i) those encoding conserved cathepsins, which include orthologs of  
250 mammalian cathepsin L and cathepsin F, and orthologs of cathepsin I and cathepsin LI (26-29kD-  
251 proteinase) that are found in most insects (manuscript in preparation); (ii) 13 species-specific  
252 cathepsin L-like genes that do not have orthologs in other insects and are unique to *Gerris buenoi*.  
253 The cathepsin B-like family contained an ortholog of mammalian cathepsin B and two species-  
254 specific cathepsin B-like peptidase genes.

255 Conserved cathepsins of *Gerris buenoi* have a unique profile: there are eight cathepsin LI genes,  
256 while in most species only one copy of the gene is found. Functional analysis of cathepsin LI is  
257 premature, but previous studies suggested that those peptidases (26-29kD-proteinases) could play  
258 a role in immune defense system degrading foreign proteins [55] or participate in metamorphosis  
259 [48]. Species-specific cysteine peptidases include 15 different genes, 11 of which form two  
260 phylogenetic clades presumably derived from an original cathepsin L through the course of  
261 evolution, and localized as sequential clusters of 2 to 4 genes. Considering all Heteroptera species  
262 described thus far have digestive cysteine peptidases [50-52], we propose that they also may play  
263 a digestive role in *Gerris buenoi*. This hypothesis is supported by the fact that similar species-  
264 specific clades of cysteine peptidases in the more thoroughly studied coleopterans *Tribolium*  
265 *castaneum* [47, 48], *Tenebrio molitor* [47] and *Leptinotarsa decemlineata* [56] are linked to  
266 digestion of food.

267



268 **Visual genes**

269 Water striders have drawn exceptional interest by visual scientists due to their exceptional visual  
270 ecology and correspondingly specialized organization of the visual system. The prominent, over  
271 900 ommatidia counting compound eyes of water striders are involved in prey localization, mating  
272 partner pursuit, and predator evasion [57-59]. Although water striders utilize vision for dispersal  
273 by flight, water strider vision is considered specifically adapted to maximally sensitive 2-  
274 dimensional perception, i.e. the horizontal horizon of their water surface environment. Main  
275 evidence for this is the lateral acute zone, which facilitates neural superposition vision [60, 61].  
276 Similar to higher Diptera like *Drosophila*, each ommatidial input is optically insulated from  
277 neighboring ommatidia through apposition optics. The sensitivity of target neurons in the lamina,  
278 however, is heightened at the level of neural organization of photoreceptor axons in target  
279 locations of the optic neuropils defined as neural superposition [57]. A likely functional  
280 morphological corollary of this is the open organization of the rhabdom in water strider  
281 ommatidia: Most of the individual photoresponsive membrane compartments (rhabdomeres) of  
282 each of the 8 photoreceptors per ommatidium are physically separated from each other [62]. This  
283 trait is shared derived trait for Heteroptera in contrast to Auchenorrhyncha and Coleorrhyncha  
284 [63], which feature a closed rhabdom where all rhabdomeres are in contact with each other along  
285 the proximodistal axis of the ommatidium.

286 Further notable for water strider vision is the dimorphism of ventral and dorsal ommatidia at the  
287 level of inner photoreceptor organization [63]. In the both dorsal and lateral ommatidia, both of  
288 the two inner photoreceptors contribute rhabdomeres in a highly organized orientation related to  
289 the rhabdomeres of the outer photoreceptors. In ventral ommatidia, by contrast, only the inner  
290 photoreceptor R8 forms a rhabdomere while the inner photoreceptor R7 does not. Interestingly,  
291 the specific orientation of the ventral R8 rhabdomeres is variable across Gerromorpha species. The  
292 tandem position of the R7 and R8 rhabdomeres in dorsal ommatidia has been proposed to be  
293 shared derived for Gerromorpha [63].

294 Typical for aquatic insects [64], *Gerris* is also polarized light-sensitive [65]. Schneider and Langer  
295 [62] describe how the cellular structure of photoreceptors relates to different polarized light  
296 sensitivities in the dorsal and ventral eyes. Studying the spectral sensitivity of *Gerris*  
297 photoreceptors to polarized light [66] concluded that the peripheral photoreceptors are blue  
298 sensitive while the inner photoreceptors are green sensitive, consistent with a larger number of  
299 sampled blue vs green photoreceptors. On the other hand, Bartsch [67] recorded 37

300 photoreceptor cells, only 7 of which were blue sensitive while the rest were green sensitive. This  
301 study further revealed the existence of green and blue sensitive polarized light detecting  
302 subsystems in the lateral-equatorial and lateral-dorsal region of the eye. The green-sensitive  
303 subsystem has been proposed to mediate object detection while the function of the blue sensitive  
304 system has remained enigmatic.

305 Our genomic analysis of *Gerris buenoi* uncovered 8 opsin homologs. This included one member  
306 each of the 3 deeply conserved arthropod non-retinal opsin subfamilies (c-opsin, Arthropsin, and  
307 Rh7 opsin) and 5 retinal opsins (Figure 4A and Supplementary Figure 2). The latter sorted into one  
308 member of the UV-sensitive opsin subfamily and 4 tightly tandem clustered members of the long  
309 wavelength sensitive (LWS) opsin subfamily (Figure 4A). Surprisingly, both genomic and  
310 transcriptome search in *G. buenoi* and other water strider species failed to detect sequence  
311 evidence of homologs of the otherwise deeply conserved blue-sensitive opsin subfamily [68].

312 While the apparent lack of blue opsin in *Gerris buenoi* was unexpected given the presence of blue  
313 sensitive photoreceptors, it was consistent with the lack of blue opsin sequence evidence in  
314 available genomes and transcriptomes of other heteropteran species including *Halyomorpha*  
315 *halys*, *Oncopeltus fasciatus*, *Cimex lectularius*, *Rhodnius prolixus*. Blue opsin, however, is present in  
316 other hemipteran clades, including Cicadomorpha (*Nephotettix cincticeps*) and Sternorrhyncha  
317 (*Pachypsylla venusta*) (Figure 4B and Supplementary Figure 2). Taken together, these data lead to  
318 the conclusion that the blue-sensitive opsin subfamily was lost early in the last common ancestor  
319 of the Heteroptera (Figure 4B), raising the question, which compensatory events explain the  
320 presence of blue sensitive photoreceptors in water striders.

321 Studies in butterflies and beetles produced evidence of blue sensitivity shifts in both UV- and LWS-  
322 opsin homologs following gene duplication [69-71]. Given that the UV-opsin family is generally  
323 conserved throughout insects even in crepuscular species like kissing bugs and bed bugs (opsin  
324 gene tree), and that evidence of UV-sensitive photoreceptors has been reported for  
325 backswimmers [72], it seems most likely that one or more of the newly expanded *Gerris buenoi*  
326 LWS opsin genes represent blue-shifted paralogs.

327 In further support of this hypothesis, the 4 *Gerris buenoi* LWS opsin paralogs have accumulated  
328 substantial sequence divergence amounting to pairwise 40 to 80 amino acid differences despite  
329 their tight genomic linkage. Further, there are compelling similarities at the four amino acid sites  
330 that have been implicated in the green to blue sensitivity shifts of butterfly LWS opsins: Ile17Met,  
331 Ala64Ser, Asn70Ser, and Ser137Ala [69, 70]. Most intriguingly, the Gblue LWS opsin 4 paralog

332 matches all green-sensitive amino acid residue states at these tuning positions, thus favoring this  
333 paralog as green-sensitive (Figure 4C). This conclusion is further bolstered by the near perfect  
334 amino acid state matches of the physiologically well-characterized green-sensitive LWS opsins of  
335 *Drosophila* and honeybee (Figure 4C), suggesting functional relevance across insect orders.  
336 Combined with the sequence evidence from green vs blue-shifted LWS-opsins of butterflies, the  
337 existence of the blue-shifted LWS opsins Rh1 and Rh2 in addition to the green-sensitive Rh6 LWS  
338 opsin in *Drosophila* makes it also possible to probe for comparative evidence for the existence of  
339 candidate blue-shifting amino acid states in the Gbue LWS opsin paralogs 1, 2 and 3 (Figure 4C).  
340 This approach identifies different sets of blue-shifting amino acid states in Gbue LWS opsin 1 and  
341 3. Most compellingly, both paralogs possess a blue-shift correlated methionine at position 17 as  
342 opposed to the green-sensitivity correlated isoleucine of Gbue LWS opsin 2 and 4. The same holds  
343 true for the blue-shifted LWS opsins Rh1 vs the green-sensitive Rh6 LWS opsin of *Drosophila*. At  
344 position 64, the phylogenetic signal for serine as blue-shifted state vs alanine as green-sensitive  
345 state is particularly strong in butterflies [69, 70]. This correlation, however, is not consistently  
346 shared in the *Drosophila* and the honeybee. While the extremely blue-shifted *Drosophila* LWS  
347 opsin Rh2 does possess a serine at this site, so does the green-sensitive LWS opsin 1 of the  
348 honeybee. These conflicting signals prevent a straightforward interpretation of the otherwise  
349 intriguing occupation of this site by either alanine or serine in the 4 *Gerris buenoi* LWS opsin. Less  
350 ambiguity, however, applies position 70, where Gbue LWS opsin 3 stands out by sharing a serine  
351 residue with blue-shifted butterfly LWS opsins. While the green-sensitivity associated asparagine is  
352 highly conserved, even in both blue-shifted *Drosophila* LWS opsins, the corresponding rarity of the  
353 serine state amounts to compelling evidence in support of Gbue LWS opsin 3 as blue-shifted LWS  
354 opsin. The comparative signal at tuning position 137, finally, is less straightforward to interpret.  
355 This site is occupied by a serine in *Gerris buenoi* LWS opsins 1 and 4 vs glycine in *Gerris buenoi* LWS  
356 opsins 2 and 3. The comparison with both butterfly and honeybee suggests the serine state of  
357 *Gerris buenoi* LWS opsins 1 and 4 as green-sensitive, no identical reference point exists for the  
358 glycine state of *Gerris buenoi* LWS opsins 2 and 3. However, the only conservative difference to  
359 the alanine state in the blue shifted LWS opsins of butterflies and *Drosophila* (Rh2) can be valued  
360 as tentative evidence for blue-shifted states of *Gerris buenoi* LWS opsins 2 and 3.  
361 Collectively, the comparative evidence identifies Gbue LWS opsin 3 as the candidate blue-shifted  
362 paralog with the highest confidence followed by Gbue LWS opsin 1 and 2. This conclusion is  
363 further backed by the fact that water striders lack ocelli, which implies that all four paralogs are

364 most likely expressed in photoreceptors of the compound eye. Overall, it thus seems most likely  
 365 that the differential expression of the highly sequence-diverged Gblue LWS opsin paralogs  
 366 accounts for the presence of both blue- and green-sensitive photoreceptors in water striders.  
 367 Moreover, given that the outer blue photoreceptors have been specifically implicated in the  
 368 detection of contrast differences in water striders [66], it is tempting to speculate that the  
 369 deployment of blue-shifted LWS opsins represents another parallel to the fast-tracking visual  
 370 system of higher Diptera. While these predictions await physiological verification in water striders,  
 371 the genomic exploration of *Gerris buenoi* vision identifies water striders and Heteroptera as a  
 372 whole as an exceptionally relevant group in the molecular study of adaptive visual system  
 373 evolution for comparison to Lepidoptera, Hymenoptera, and the higher Diptera (Brachycera).  
 374 In addition to these five retinal opsins, three extra-retinal opsins were detected in the *Gerris*  
 375 genome: The deeply conserved yet functionally still poorly understood Rh7 opsin subfamily [73,  
 376 74], Arthropsin [75-77], and c-opsin (Supplementary Figure 2 and Supplementary Table 5). Only  
 377 partial sequences Arthropsin and c-opsin were detectable in the *Gerris buenoi* genome assembly.  
 378 However, complete transcript sequences were found in the transcriptome of the closely related  
 379 water strider species *Limnoporus dissortis* (Supplementary Figure 2).

380

### 381 **Chemoreceptor gene families**

382 The three chemoreceptor families addressed herein are the seven-transmembrane-domain  
 383 Odorant and Gustatory Receptors that together comprise the insect chemoreceptor superfamily,  
 384 and the unrelated three-transmembrane-domain Ionotropic Receptors [78, 79]. All three families  
 385 have recently been fully documented from three other heteropterans with genome sequence used  
 386 as comparators here, the kissing bug *Rhodnius prolixus* [80], the bedbug *Cimex lectularius* [81],  
 387 and the milkweed bug *Oncopeltus fasciatus* [9]. More distant comparisons with other hemipteroid  
 388 insects like the pea aphid *Acyrtosiphon pisum* [82] and the human body louse *Pediculus humanus*  
 389 [17] are not included here as these chemoreceptors are mostly highly divergent from these four  
 390 species, and comparisons including all five above species are available in Panfilio et al. [9].  
 391 The Odorant Receptors (ORs) is a large family, which, at least in several endopterygotes, have  
 392 been shown to mediate most of insect olfaction (e.g. [79]). The OR family evolved within basal  
 393 insects [83, 84] and consists of the single highly conserved Odorant receptor Co-receptor protein  
 394 and a set of “specific” ORs, each of which is co-expressed with OrCo, generally one specific OR per  
 395 olfactory sensory neuron type. The OR family in *Gerris* consists of at least 153 genes, two of which

396 are modelled as being alternatively spliced in a fashion found in many other insects, with two long  
397 first exons encoding most of the protein that are alternatively spliced into several short-shared  
398 exons encoding the C-terminus. Thirteen of these OR genes are pseudogenic in the genome  
399 assembly, so the total of seemingly intact ORs in this compilation is 146, however many are partial  
400 models and many gene fragments remain. Phylogenetic analysis along with the other three  
401 heteropterans reveals the usual high conservation of the single OrCo proteins (Supplementary Figure  
402 4A). There are three possible simple orthologs of “specific” ORs across these four heteropterans,  
403 indicated with an asterisk in Supplementary Figure 4A, and two more with simple duplications in one  
404 or more species (two asterisks). Otherwise the relationships consist either of highly divergent  
405 genes, or large expansions or “blooms” of ORs within a particular heteropteran lineage. In the case  
406 of *Gerris* these include expansions of 4 (Or64-67), 8 (Or145-152), 9 (Or90-97a/b), 13 (Or72-84), 13  
407 (Or98-110), 16 (Or111-125), 18 (Or44-61), and 44 proteins (Or1-43). Comparable expansions were  
408 previously described in *Rhodnius* and *Oncopeltus* and are clear in this analysis as well (Supplementary  
409 Figure 4A). In contrast, *Cimex* has almost no lineage-specific expansions, with OR clades consisting  
410 of only 1, 2, or 3 genes.

411 The Gustatory Receptors (GRs) is also a large family and consist of subfamilies and lineages that  
412 predate even the origins of the OR family [78, 84-86]. The most prominent of these are the sugar,  
413 carbon dioxide, and fructose receptor subfamilies (Supplementary Figure 4B). The sugar receptors,  
414 represented here by Gr1/2 from *Apis mellifera*, were lost from the obligate blood feeders *Cimex*  
415 and *Rhodnius*, but are present as three genes each in *Oncopeltus* and this more general predator  
416 (Gr7-9). The carbon dioxide receptor subfamily, represented here by the Gr21a/62a dimer in *D.*  
417 *melanogaster* and Gr1-3 in *Tribolium castaneum*, was lost from most Hymenoptera as well as  
418 *Rhodnius*, but multiple related GRs are present in *Cimex*, *Oncopeltus*, and *Gerris* (Gr1-6). It remains  
419 to be shown whether these more distant relatives of the carbon dioxide receptors of  
420 endopterygotes are involved in perception of this molecule in heteropterans. The fructose  
421 receptor implicated also in brain nutrient sensing [87] has a single representative in each  
422 heteropteran, although the *Gerris* gene is represented only by a fragment in the current genome  
423 assembly (Gr10). This is the only GR lineage that is a simple ortholog across these four  
424 heteropterans. The remaining GRs present a pattern similar to that of most of the ORs, that is, a  
425 few highly divergent lineages, and several highly expanded lineages. In these GRs, however, these  
426 expansions mostly involve large alternatively-spliced loci, comparable to those found in many  
427 other insects from *D. melanogaster* [86] to *Calopteryx splendens* [83]. These loci consist of several

428 long first exons encoding most of the receptor (transmembrane domains 1-6) that are modelled as  
429 being alternatively spliced into three short shared exons encoding the intracellular loop 3 and  
430 TM7. The three largest of these loci, Gr35, 48, and 32 encode 11, 11, and 13 different and  
431 sometimes quite divergent receptors, respectively (Supplementary Figure 4B). The largest of these GR  
432 expansions consists of 80 proteins encoded by 27 genes (Gr22-48), while three smaller expansions  
433 of 10, 12, and 14 proteins also involve alternatively-spliced loci (Gr45-47, 55-60, and 15-19,  
434 respectively). This pattern of expansion of the “bitter” GRs in alternatively-spliced loci is shared  
435 with *Oncopeltus* where it has resulted in an even larger repertoire of “bitter” GRs, but barely at all  
436 in *Rhodnius* and *Cimex* both of which have comparatively small “bitter” GR subfamilies,  
437 presumably reflecting the different chemical ecologies of these four heteropterans.

438 The Ionotropic Receptors (IRs) is a variant family of the large and ancient superfamily of ionotropic  
439 glutamate receptors [78, 88]. The family contains two highly conserved co-receptors that are very  
440 similar to the ionotropic glutamate receptors in sequence and structure, Ir8a and 25a  
441 (Supplementary Figure 4C), as well as another widely expressed gene that might also encode a co-  
442 receptor, Ir76b, specifically involved in perception of amino acids [89, 90]. These heteropterans  
443 have four more single-copy IRs (21a, 40a, 68a, and 93a), most of which are implicated in  
444 perception of a variety of stimuli from temperature to humidity [91, 92]. All of these are present  
445 as single-copy clear orthologs of the named *Drosophila* genes, and indeed most are older gene  
446 lineages than heteropterans [83]. An unusual exception is that there is a divergent duplicate of  
447 Ir8a (Ir8a2L) immediately upstream of and in tandem with Ir8a. This gene is missing the first 1/3 of  
448 the equivalent length of Ir8a, and there is no RNAseq support for it, unlike Ir8a and 25a, so it might  
449 not be functional. As is commonly the case in other insects, there is a small expansion to four  
450 genes of the lineage related to the Ir41a/76a/92a lineage in *D. melanogaster*, which for  
451 consistency with other genomes are named in an Ir41 series (Ir41d is not shown in Supplementary  
452 Figure 4C because it is a partial model that does not align well). In *Drosophila* Ir41a and 92a have  
453 been implicated in detection of amines [93, 94]. A far larger expansion of 24 genes is related to the  
454 Ir75a-d/64a/84a lineage in *D. melanogaster*, and again this lineage is also expanded in many other  
455 insects, although seldom to this extent. Ir75a/b, 64a, and 84a in *Drosophila* flies have been shown  
456 to be involved in perception of several acids [95-99]. Like the other heteropterans and many other  
457 insects, there are several highly divergent IRs, falling into two groups with no simple relationships  
458 to *D. melanogaster* IRs. These were therefore named in a series from Ir101 to avoid confusion with  
459 *D. melanogaster* Ir genes, whose names only go to Ir100a because like the Or and Gr genes they

460 were named for their cytological location in the polytene chromosomes. Ir101-105 are weakly  
461 related to a large expansion of so-called “divergent” IRs in *Drosophila*, including the Ir20a clade  
462 that function as gustatory receptors [100, 101]. Ir106-109 form a small clade related only to some  
463 other divergent heteropteran IRs, and are perhaps also involved in gustation. Thus, while not  
464 nearly as large as the OR and GR families, these IRs probably contribute some well-conserved  
465 functions shared with their orthologs with *Drosophila*, as well as perception of amines and diverse  
466 acids, and contribute to gustation. The only lineage-specific expansion compared with the other  
467 heteropterans is the IR75 clade implicated in perception of various acids, but it is unclear how this  
468 relates to the chemical ecology of water striders.

469

### 470 **Wing development and polyphenism**

471 The ability to produce different phenotypes from a single genome in response to environmental  
472 cues is called ‘polyphenism’ [102]. Water striders express a seasonal wing polyphenism (Figure 1),  
473 where adults are short-winged in the early summer generation when habitats are stable, but are  
474 long-winged in the mid-summer generation when habitats become unstable [103, 104]. It is  
475 thought that this wing polyphenism reflects an adaptive tradeoff between wing length and  
476 reproduction, where in unstable habitats populations invest in long wings and produce fewer  
477 offspring, but in stable habitats populations produce short wings and invest in more offspring  
478 [103, 104]. The environmental cues that may affect wing morphology include photoperiod,  
479 temperature, resource availability, and population density [104-106].

480 Wing polyphenism and adaptive tradeoffs between flight and reproduction are ecologically  
481 important and phylogenetically widespread among insects. In wing polyphenic ants and aphids, for  
482 example, previous studies used bioinformatics approaches to infer that the genes involved in the  
483 development of wings and the ovaries have a different DNA methylation signature relative to the  
484 rest of the genome [107-111]. This suggests that these genes are regulated by epigenetic  
485 mechanisms [107-111]. Therefore, in the water strider *Gerris buenoi*, we predicted that genes  
486 involved in wing patterning and reproduction will also have a different DNA methylation signature  
487 relative to the rest of the genomes. Furthermore, previous studies have shown that juvenile  
488 hormone (JH) and insulin signaling pathways are associated with regulation of reproduction and  
489 wing polyphenism in insects [102, 112-114]. We therefore analyzed epigenetic signatures in genes  
490 involved in both of these pathways relative to the rest of the genome. Finally, we compared genes  
491 from *Gerris buenoi* to orthologues in *Rhodnius proxilus* because this closely related species serves

492 as a phylogenetically controlled outgroup, which has not evolved wing polyphenism.  
493 We discovered that the mean CpG<sub>O/E</sub> values for *Gerris buenoi* genes in the network related to wing  
494 polyphenism, juvenile hormone, insulin signalling and reproduction are not significantly different  
495 from the mean of the resampled distribution of CpG<sub>O/E</sub> of all *Gerris buenoi* genes (Supplementary  
496 Figure 8 and Supplementary Table 14 : List of genes in the networks underlying wing polyphenism,  
497 reproduction, juvenile hormone, and insulin signalling included in the analysis and their CpG<sub>O/E</sub>  
498 value for *Gerris buenoi* and *Rhodnius prolixus*. Genes that were annotated in *Gerris buenoi* but  
499 excluded from the analysis because they did not have a complete coding sequence are also listed but  
500 without a CpG<sub>O/E</sub> value.). The mean CpG<sub>O/E</sub> of the *R. prolixus* orthologues related to wing  
501 polyphenism, juvenile hormone regulation, insulin signalling and reproduction is also not  
502 significantly different from the mean of the resampled distribution of CpG<sub>O/E</sub> of all  
503 *Rhodnius prolixus* (Supplementary Figure 8). These results indicate that genes in the network  
504 related to wing polyphenism, juvenile hormone, insulin signalling and reproduction do not have a  
505 distinct methylation signature relative to the rest of genes in *Gerris buenoi* and *Rhodnius prolixus*  
506 genomes.

507 The sequencing of three ant genomes, each of which possess a dramatic wing and reproductive  
508 polyphenism, showed significant methylation signature of genes known to be involved in wing and  
509 reproductive development relative to the rest of the genes in the ant genomes [107-109]. We  
510 therefore expected that genes involved in wing and reproductive development in the wing  
511 polyphenic water strider *Gerris buenoi* would possess a similar methylation signature as in the  
512 ants. To our surprise, the results of our analysis reveal that methylation signatures in genes  
513 involved in wing and reproductive development are not significant relative to the rest of the  
514 genome. This is also the case for the closely-related and non-wing polyphenic insect *Rhodnius*  
515 *prolixus*. These findings suggest that more classical mechanisms for achieving differential gene  
516 expression underlying polyphenism, such as endocrine-based mechanisms like hormone secretion  
517 and neuropeptide release, are involved in regulating the expression of genes underlying wing  
518 polyphenism as well as the trade-off between wing development and reproduction in water  
519 striders [115]. Altogether, these results open up exciting future research possibilities for  
520 understanding how wing polyphenism is regulated in water striders, and why they appear to differ  
521 from other polyphenic insects.

522



**523 DNA methyltransferases**

524 DNA methylation is an epigenetic mechanism known to be involved in the regulation of alternative  
525 splicing and gene expression in insects [116-118]. In honeybees, it has been demonstrated that the  
526 DNA methyltransferase, DNMT3, is critical in sizing, morphology and reproductive organ  
527 development associated with caste determination as well as alternative splicing regulation [117-  
528 119]. Furthermore, differential DNA methylation is associated with flexible behavioral castes  
529 (nurses and foragers) in bees [120]. Therefore, this epigenetic mechanism is considered to be a  
530 potentially key regulator of morphological development and behavioral differentiation in insects.  
531 Paradoxically, many insects have lost key elements of the DNA methylation toolkit, including  
532 DNMT1 and DNMT3, as is the case for *Drosophila melanogaster* [121]. In order to see if this  
533 pathway may be worth further investigation for the study of morphological development in water  
534 striders, we searched for several core elements that regulate this molecular process. Although we  
535 found that the water strider genome does possess *DNMT1*, which is essential for the maintenance  
536 of DNA methylation, and *DNMT2*, the protein of which functions to methylate tRNAs, the *Gerris*  
537 *buenoi* genome does not contain an ortholog of *DNMT3*, which is essential for de novo DNA  
538 methylation. It is hard to predict the significance of *Gerris buenoi* lacking *DNMT3* because the  
539 presence versus absence of this gene is quite erratic across insects [122]. Although it may be  
540 associated with the capacity for elaborate environmentally-dependent developing processes,  
541 including those that are polyphenic as it is found in a range of invertebrates including the pea  
542 aphid [123], *Daphnia* [124], termites [125] and various hymenoptera including bees and ants that  
543 are highly plastic [107, 126, 127]. Still, there are other highly conserved epigenetic processes, such  
544 as histone modifications, which are conserved in *Gerris buenoi*, and may serve as alternative  
545 mechanisms for the regulation of developmental plasticity.

546

**547 Histone genes and histone modification machinery**

548 Chromatin remodelling, via post-translational modifications of histones, is a key regulator of gene  
549 expression. These epigenetic processes have been associated with environmental responsiveness  
550 and phenotypic plasticity [128]. One of the most striking cases of plasticity in the Gerridae is  
551 associated with wing development [129]. Most species of this family exhibit winged and wingless  
552 morphs known as apterous and macropterous morphs [129, 130]. Wing development is influenced  
553 by both genetic and environmental factors such as habitat stability, day/night cycle and latitude  
554 [103, 104, 131]. Other cases of phenotypic plasticity include leg length, pigmentation, and a set of

555 secondary sexual traits in both males and females [132]. While our understanding of the ecology  
556 of these cases of phenotypic plasticity is increasingly richer, the lack of a water strider genome has  
557 hindered studies of the genetic and developmental factors associated with them. We therefore  
558 analysed the *Gerris buenoi* genome content in search for components of the epigenetic  
559 machinery.

560 In the *Gerris buenoi* genome we could identify 49 histone proteins encoding loci, a moderately  
561 large number of genes similar to that found in *Cimex lectularius* and *Daphnia pulex*, but  
562 substantially smaller than that detected in the *Aedes aegypti* or *Drosophila* genomes  
563 (Supplementary Table 15). We identified genes encoding the five major classes of histone proteins  
564 (H2A, H2B, H3, H4 and the linker histone H1) as well as copies of genes encoding the variant  
565 histones H2AV and H3.3. In *Drosophila* the histone genes are present in the genome in large  
566 numbers of quintet clusters, each cluster having one gene from each of the five classes of  
567 histones. A similar organization was found in the *Gerris buenoi* genome where two canonical  
568 quintet clusters were identified. Both of them consists of one copy of each of the four classes of  
569 core histone proteins (H2A, H2B, H3 and H4) and a single copy of the linker histone (H1)  
570 (Supplementary Figure 9). Additional clusters were identified, including one modified cluster  
571 containing two copies of the linker histone (H1) and two copies of the H2B core histone, but no  
572 copy of the core histone H3, as well as five truncated clusters made of three or four genes  
573 including H3 core histone gene and combinations of the other histone genes (Supplementary  
574 Figure 9). The number of these clusters is higher compared to the genomes of the milkweed bug  
575 *Oncopeltus fasciatus* and the bed bug *Cimex lectularius*, which contain one and two clusters  
576 respectively [9, 81]. The functional significance of these clusters remains unknown, thus opening  
577 new avenues in the study of the relationship between epigenetics and phenotypic plasticity [133].  
578 Histone proteins can be post-translationally modified to dynamically influence the structure of the  
579 chromatin. We found in the *Gerris buenoi* genome genes responsible for all classes of histone  
580 modifications: histone acetyltransferases, deacetylases, methylases and demethylases.  
581 Interestingly, we found a duplication of the histone acetyltransferases *males absent on the first*  
582 (*mof*) and *chameau* (*chm/HAT1*). *Mof* functions in dosage compensation and genome stability in  
583 *Drosophila* [134, 135]. Duplications of *mof* and *chm* have previously been reported for  
584 *Acyrtosiphon pisum* and were thought to be unique [136] although *mof* duplication was also  
585 recently detected in *Oncopeltus fasciatus* [9] and *Cimex lectularius* [81]. Phylogenetic analysis  
586 indicates the duplications that have occurred in these species are independent of the duplication

587 that occurred in *Acyrtosiphon pisum* and likely occurred early in the heteropteran lineage ~250  
588 million years ago (Supplementary Figure 10). Unusually, we also identified a duplication of the  
589 *Gerris buenoi* histone deacetylase *Sirt1* (*sir2*) and *Sirt5*; and the histone methyltransferase *grappa*.  
590 *Sirt1* is a nuclear and cytoplasmic deacetylase that has a role in histone modifications [137] and  
591 has been associated with enhanced stress response and life-span extension in numerous species  
592 [136, 138, 139]. *Grappa*, histone methyltransferase, modifies the lysine (K)79 residue of histone H3  
593 and has been implicated in the stress response in *Drosophila* providing protection against  
594 oxidative and caloric stress [140]. Interestingly, duplications of *Grappa* have not been detected in  
595 any other hemipteran species.

596 In conclusion, the high number of histone clusters found as well as the duplication of some post-  
597 translational modifications of histones genes open up exciting future research possibilities for  
598 understanding their role in environmental responsiveness and phenotypic plasticity in *Gerris*  
599 *buenoi*.

600

#### 601 **Antioxidant Proteins**

602 Reactive oxygen species (ROS), including superoxide radicals ( $O_2^-$ ), hydroxyl radicals ( $OH^\cdot$ ), and  
603 hydroperoxides ( $H_2O_2$ , and  $ROOH$ ), are generated by aerobic metabolism but may also be  
604 encountered in an organism diet or environment [141-143]. Moderate levels of ROS drive a variety  
605 of processes including cellular signaling, transcriptional regulation, as well many other  
606 physiological processes. However, inability to regulate ROS concentrations can result in the  
607 accumulation of ROS-induced damaged lipids, proteins, and nucleic acids [141-143]. Animals have  
608 evolved a complex system of antioxidant enzymes and molecules, facilitating the modulation of  
609 ROS levels [142, 144-146]. The enzymatic antioxidant system is comprised of a diverse suite of  
610 proteins that can be divided into clades based on their modes of action. Catalase (CAT),  
611 superoxide dismutase (SOD), and a variety of peroxidases make up the core of the antioxidant  
612 response. Thioredoxins and methionine sulphoxide reductases form a secondary system for  
613 managing ROS [144, 145].

614 Thirty putative proteins in seven families related to antioxidant capacity were identified within the  
615 *G. buenoi* genome. The thirty antioxidant response proteins showed high homology to related  
616 proteins in other published genomes including *Acyrtosiphon pisum*, *Apis mellifera*, *Bombyx mori*,  
617 *Cimex lectularis*, *Drosophila melanogaster*, *Pediculus humanus*, and *Tribolium castaneum* (see  
618 Supplementary Methods). In most comparisons, homologs in *C. lectularis* genome showed the

619 highest degree of similarity (Supplementary Table 16). Representatives of all major antioxidant  
620 enzyme clades were identified in the *G. buenoi* genome assembly including a *Catalase*-like gene,  
621 four heme-binding peroxidases, multiple glutathione-s-transferases, peroxidase, multiple  
622 peroxiredoxins, and superoxide dismutases. This representation suggests that the *G. buenoi*  
623 genome contains a complete suite of antioxidant enzymes. There is no apparent expansion or  
624 reduction in the gene families that were surveyed in this analysis, however further investigation  
625 through additional annotation and experimental validation may reveal otherwise.

626

## 627 **Supplementary Methods**

### 628 **Genome sequencing and assembly**

629 *Gerris buenoi* is one of thirty arthropod species sequenced as a part of a pilot project for the i5K  
630 arthropod genomes project at the Baylor College of Medicine Human Genome Sequencing Center.  
631 For all of these species, an enhanced Illumina-ALLPATHS-LG sequencing and assembly strategy  
632 enabled multiple species to be approached in parallel at reduced costs. For most species, including  
633 *Gerris buenoi*, we sequenced four libraries of nominal insert sizes 180bp, 500bp, 3kb and 8kb. The  
634 amount of sequence generated from each of these libraries is noted in Supplementary Table 17  
635 with NCBI SRA accessions. The 180bp, 500bp and 3kb mate pair libraries were made from a single  
636 male individual, and the 8kb mate pair library from female genomic DNA.

637 To prepare the 180bp and 500bp libraries, we used a gel-cut paired end library protocol. Briefly, 1  
638 µg of the DNA was sheared using a Covaris S-2 system (Covaris, Inc. Woburn, MA) using the 180-bp  
639 or 500-bp program. Sheared DNA fragments were purified with Agencourt AMPure XP beads, end-  
640 repaired, dA-tailed, and ligated to Illumina universal adapters. After adapter ligation, DNA  
641 fragments were further size selected by agarose gel and PCR amplified for 6 to 8 cycles using  
642 Illumina P1 and Index primer pair and Phusion® High-Fidelity PCR Master Mix (New England  
643 Biolabs). The final library was purified using Agencourt AMPure XP beads and quality assessed by  
644 Agilent Bioanalyzer 2100 (DNA 7500 kit) determining library quantity and fragment size  
645 distribution before sequencing.

646 The long mate pair libraries with 3kb or 8kb insert sizes were constructed according to the  
647 manufacturer's protocol (Mate Pair Library v2 Sample Preparation Guide art # 15001464 Rev. A  
648 PILOT RELEASE). Briefly, 5 µg (for 2 and 3-kb gap size library) or 10 µg (8-10 kb gap size library) of  
649 genomic DNA was sheared to desired size fragments by Hydroshear (Digilab, Marlborough, MA),

650 then end repaired and biotinylated. Fragment sizes between 3-3.7 kb (3kb) or 8-10 kb (8kb) were  
651 purified from 1% low melting agarose gel and then circularized by blunt-end ligation. These size  
652 selected circular DNA fragments were then sheared to 400-bp (Covaris S-2), purified using  
653 Dynabeads M-280 Streptavidin Magnetic Beads, end-repaired, dA-tailed, and ligated to Illumina PE  
654 sequencing adapters. DNA fragments with adapter molecules on both ends were amplified for 12  
655 to 15 cycles with Illumina P1 and Index primers. Amplified DNA fragments were purified with  
656 Agencourt AMPure XP beads. Quantification and size distribution of the final library was  
657 determined before sequencing as described above.

658 Sequencing was performed on Illumina HiSeq2000s generating 100bp paired end reads. Reads  
659 were assembled using ALLPATHS-LG (v35218) [147] on a large memory computer with 1Tbyte of  
660 RAM and further scaffolded and gap-filled using in-house tools Atlas-Link (v.1.0) and Atlas gap-fill  
661 (v.2.2) (<https://www.hgsc.bcm.edu/software/>). This yielded an assembly of 1,000.16 Mb (653 Mb  
662 without gaps within scaffolds) with a contig N50 of 3.8 kb and scaffold N50 of 344kb which has  
663 been deposited in the NCBI: GenBank assembly accession GCA\_001010745.1

#### 664 665 **Automated Gene Annotation Using a Maker 2.0 Pipeline Tuned for Arthropods**

666 Of 30 attempted i5K pilot species, 28 i5K pilot genome assemblies including *G. buenoi* were  
667 subjected to automatic gene annotation using a Maker 2.0 annotation pipeline tuned specifically  
668 for arthropods. The pipeline is designed to be systematic providing a single consistent procedure  
669 for the species in the pilot study, scalable to handle 100's of genome assemblies, evidence guided  
670 using both protein and RNA-seq evidence to guide gen models, and targeted to utilize extant  
671 information on arthropod gene sets. The core of the pipeline was a Maker 2 [148] instance,  
672 modified slightly to enable efficient running on our computational resources. The genome  
673 assembly was first subjected to de-novo repeat prediction and CEGMA analysis to generate gene  
674 models for initial training of the ab-initio gene predictors. Three rounds of training of the Augustus  
675 [149] and SNAP [150] gene predictors within Maker were used to bootstrap to a high quality  
676 training set. Input protein data included 1 million peptides from a non-redundant reduction (90%  
677 identity) of Uniprot Ecdysozoa (1.25 million peptides) supplemented with proteomes from  
678 eighteen additional species (*Strigamia maritima*, *Tetranychus urticae*, *Caenorhabditis elegans*, *Loa*  
679 *loa*, *Trichoplax adhaerens*, *Amphimedon queenslandica*, *Strongylocentrotus purpuratus*,  
680 *Nematostella vectensis*, *Branchiostoma floridae*, *Ciona intestinalis*, *Ciona savignyi*, *Homo sapiens*,  
681 *Mus musculus*, *Capitella teleta*, *Helobdella robusta*, *Crassostrea gigas*, *Lottia gigantea*,

682 *Schistosoma mansoni*) leading to a final 'nr' peptide evidence set of 1.03 million peptides. RNA-seq  
683 transcription data derived from mixed sex embryo's and nymphs (Supplementary Table 17) was used  
684 judiciously to identify exon-intron boundaries but with a heuristic script to identify and split  
685 erroneously joined gene models. We used CEGMA models for QC purposes: for *Gerris buenoi*, of  
686 1,977 CEGMA single copy ortholog gene models, 1,783 were found in the assembly and 1,895 in  
687 the final predicted gene set – a reasonable result given the small contig sizes of the assembly. We  
688 assume the gene predictors could pull together exons from different contigs with greater success  
689 than the sequence comparison used to identify CEGMA genes in the assembly, generating the  
690 larger number of control gene models found in the gene set than the underlying assembly. Finally,  
691 the pipeline uses a nine-way homology prediction with human, *Drosophila* and *Caenorhabditis*  
692 *elegans*, and InterPro Scan5 to allocate gene names. The automated gene sets are available from  
693 the National Agricultural Library ([https://i5k.nal.usda.gov/Gerris\\_buenoi](https://i5k.nal.usda.gov/Gerris_buenoi)) where a web-browser of  
694 the genome, annotations, and supporting annotation data is accessible.

695

696

### 697 **Bristle genes**

698 Bristle development genes were annotated by performing tblastn searches on the *Gerris buenoi*  
699 scaffolds with the corresponding *Drosophila* gene protein sequences available in FlyBase (release  
700 6)[151]. To confirm orthology, *Gerris buenoi* models were blasted into NCBI 'nr' database.  
701 Homology, intron/exon boundary assessments, and protein sequence completeness were  
702 identified by manual inspection using RNA-seq alignments available and protein alignments  
703 generated with Clustal Omega (<http://www.ebi.ac.uk/Tools/msa/clustalo/>).

704

### 705 **Cuticular proteins**

706 Sequence motifs that are characteristic of several families of cuticle proteins [152] were used to  
707 search the genome of *Gerris buenoi* for putative cuticle proteins. 155 genes were identified,  
708 analyzed with CutProtFam-Pred, a cuticular protein family prediction tool described in Ioannidou  
709 et al. [153], and assigned to one of 5 families (CPR, CPAP1, CPAP3, CPF, and TWDL).

710

### 711 **Prey detection and selection on water environments**

712 The approach for manual annotation is similar to that used to characterize these three gene

713 families in many other insects, including *Acyrtosiphon pisum* [82], *Pediculus humanus* [17],  
714 *Rhodnius prolixus* [80], *Cimex lectularius* [81] and *Oncopeltus fasciatus* [9]. Briefly, exhaustive and  
715 iterative tblastn searches of the genome assembly with the proteins from these other  
716 heteropterans were used to find genes, which were modelled as best possible in the WebApollo  
717 browser at the i5k site. This effort was sometimes assisted by RNA-seq reads that cross introns in  
718 the available whole-body RNA-seq set, however most of these genes were not represented in that  
719 dataset. In addition, like *Oncopeltus fasciatus* this genome assembly is rather fragmented, so many  
720 of the models are incomplete, while some were joined across scaffolds and a few were improved  
721 with raw reads. Several additional gene fragments too short to include in this compilation remain  
722 for the OR and GR families and might represent additional intact genes, while some of the partial  
723 models might actually be pseudogenes. Many of these proteins are extremely divergent, and  
724 because almost none of them were modelled by the genome-wide automated annotation (models  
725 that might have facilitated searches for distant relatives using BLASTP), TBLASTN searches to find  
726 distant relatives used E values of 1000. The last two exons of the OR and GR families typically  
727 encode the most conserved regions of these proteins and are flanked by phase 0 introns, so their  
728 encoded protein sequences were used in TBLASTN searches with LQ before and VS afterwards,  
729 representing consensus splice acceptor and donor sites, to assist in finding divergent relatives.  
730 Multiple alignments of each family along with representatives from other species and maximum  
731 likelihood phylogenetic analyses of the proteins were conducted, and the tree figures prepared, as  
732 in Panfilio et al. [9]. All of the proteins are included at the end of this supplementary text, and the  
733 gene models and transcribed mRNAs for most of them are available from the i5k Workspace at the  
734 National Agriculture Library (<https://i5k.nal.usda.gov/>) and will eventually be available from the  
735 NCBI.

736

### 737 **Wing polyphenism**

738 First, we limited our analysis to genes whose complete coding sequences had been identified and  
739 annotated in the following four categories: genes involved in wing polyphenism, juvenile hormone  
740 regulation, the insulin signalling pathway, and reproduction. We then used the bioinformatics-  
741 based metric described by Elango *et al.* [111] called CpG<sub>O/E</sub> as a proxy for mutations induced by  
742 methylation of CpG islands in the germ line over evolutionary time. This CpG<sub>O/E</sub> metric uses a  
743 historical (evolutionary) measure of the level of DNA methylation by estimating the amount of  
744 CpG dinucleotide depletion normalized for GC content for each gene of interest. The CpG<sub>O/E</sub>

745 metric, or CpG dinucleotide depletion normalized for GC, is a proxy for DNA methylation in the  
 746 coding sequence of these genes. We define the  $CpG_{O/E}$  for each gene as follows:

$$747 \quad C_pG_{O/E} = \frac{P_{CpG}}{P_C P_G}$$

748 where  $CpG_{O/E}$  is an estimation of the DNA methylation levels,  $P_{CpG}$  is the frequency of CG  
 749 dinucleotides,  $P_C$  is the frequency of cytosine nucleotides, and  $P_G$  is the frequency of guanine  
 750 nucleotides [154, 155]. After cytosine is methylated, it is more amenable to deamination [155].  
 751 Over time, this leads to the reduction of CpG dinucleotides from methylated CpG regions [155].  
 752 Using a custom Perl script, we evaluated the  $CpG_{O/E}$  in the coding sequences of all predicted genes  
 753 in the *Gerris buenoi* genome and the  $CpG_{O/E}$  in the coding sequences of our genes of interest  
 754 (Supplementary Table 14).

755 Second, we compared the mean  $CpG_{O/E}$  content for our genes of interest to the mean  $CpG_{O/E}$  for all  
 756 the genes in the genome by executing a Monte-Carlo randomization procedure as described  
 757 previously [107-111]. Briefly, we randomly selected 50  $CpG_{O/E}$  values from the genome to produce  
 758 a random distribution, calculated the mean, and repeated this process 10000 times. All mean  
 759  $CpG_{O/E}$  values were plotted and this distribution was compared to the mean  $CpG_{O/E}$  values for each  
 760 of our candidate gene sets. Gene sets were determined to be significantly different from the  
 761 randomly generated mean  $CpG_{O/E}$  if they fell within the bottom or top 5% of values. These  
 762 analyses were repeated for *Rhodnius proxilus* orthologues of the *Gerris buenoi* genes in our gene  
 763 sets.

764

### 765 **Wnt Signaling Pathway**

766 Protein sequences for *Wnt* ligands as well as receptors and downstream components  
 767 (*armadillo/beta-catenin*, *dishevelled*, *frizzled*, *arrow*, *axin*, *shaggy*/ *GSK-3*) from *Drosophila*  
 768 *melanogaster*, *Tribolium castaneum*, *Acyrtosiphon pisum* and *Oncopeltus fasciatus*, were  
 769 retrieved from NCBI, and used to perform standalone tblastn searches on the *Gerris buenoi*  
 770 scaffolds with a maximum e-value of  $1e^{-10}$ . Hits from all species together were ordered by scaffold  
 771 and start position, and for each group of overlapping or closely adjacent hits from multiple  
 772 orthologous queries, the putative gene name was identified by blasting back the hit sequence  
 773 against GenBank, with a taxonomic restriction to Arthropoda accessions. The query sequences  
 774 with the best hits (lowest e-values) for each gene were then used to identify the model to be  
 775 curated, by doing a tblastn search into the *Gerris* scaffolds from the Blast instance at the National



776 Agricultural Library ([https://i5k.nal.usda.gov/legacy\\_blast](https://i5k.nal.usda.gov/legacy_blast)). The Blast results were visualized in the  
777 Web Apollo instance for *Gerris buenoi* (<https://apollo.nal.usda.gov/gerbue/selectTrack.jsp>), where  
778 the corresponding automated annotation models were edited. To confirm orthology, we then  
779 Blasted the edited *Gerris buenoi* models back into GenBank. Homology, intron/exon boundary  
780 assessments, and protein sequence completeness were identified by manual inspection and  
781 correction of protein alignments generated with Clustal Omega  
782 (<http://www.ebi.ac.uk/Tools/msa/clustalo/>).

783 The numbering (subfamily identification) for *Wnt* and *fz* orthologs was assigned based on the  
784 corresponding vertebrate homolog (the naming of *Drosophila* orthologs was changed accordingly),  
785 based on phylogenetic analyses done at <http://www.phylogeny.fr/>.

786 Possible gene loci duplications were identified by performing tblastn searches on the scaffolds  
787 using the protein sequences of completed *Gerris* annotation models as queries, and then re-  
788 blasting the resulting hit sequences into GenBank for Arthropoda hits.

789

### 790 **Early Developmental Genes**

791 The choice of early developmental genes (Gap, Pair Rule, and Segment Polarity Genes) to annotate  
792 was informed by GO term annotations in *Drosophila melanogaster* (long-germ) and *Tribolium*  
793 *castaneum* (short-germ). Protein sequences for developmental genes for *D. melanogaster* and *T.*  
794 *castaneum* were obtained from <http://flybase.org/> [151] and <http://beetlebase.org/> [156]  
795 respectively. Contig sequences were searched for homology to the selected protein sequences  
796 using tblastn. Gene models (Gbue v0.5.3-models) that aligned with the regions of highest  
797 homology identified by tblastn search were selected for further analysis. If no official gene model  
798 was present in the region of homology identified by tblastn a de novo model was generated using  
799 models generated by the Augustus-masked or snap-masked programme. RNAseq mapped reads  
800 were compared with the gene models to determine the transcribed regions. The transcribed  
801 regions were used to determine protein sequences of the gene. Protein sequences were utilised in  
802 a reciprocal blast (blastx NCBI) to confirm the homology of the orthologs. Gene models were  
803 manually edited to produce gene models that resolved conflicts between RNAseq, blastx and  
804 homology data.

805

806 **Antioxidant genes**

807 Antioxidant proteins of *Drosophila melanogaster* were utilized to initially identify potential  
808 antioxidant genes within the *Gerris buenoi* genome. The *Drosophila melanogaster* genes were  
809 obtained from FlyBase by generating a query that searched for proteins with Gene Ontology terms  
810 that were related to response to antioxidant activity and responses. These nucleotide sequences  
811 were translated to peptides and were searched against the peptide models of *G. buenoi*. The  
812 highest BLAST hit (blastp) was extracted and searched against arthropod entries of the NCBI non-  
813 redundant database to confirm the identity of the model (blastp). The confirmed model was then  
814 BLAST searched (blastp) against the peptide sequences of *Acyrtosiphon pisum*, *Apis mellifera*,  
815 *Bombyx mori*, *Cimex lectularis*, *Drosophila melanogaster*, *Pediculus humanus*, and *Tribolium*  
816 *castaneum* to extract homologs. The extracted *G. buenoi* model was then aligned to the homologs.  
817 This information and the RNA-seq data present in the WebApollo were used to manually annotate  
818 the model. The corrected model was then once more searched against the arthropod entries of  
819 the NCBI non-redundant database (blastp) to ensure that the model was correctly identified.

820

821

822

823 **Supplementary Figures and Tables**

824

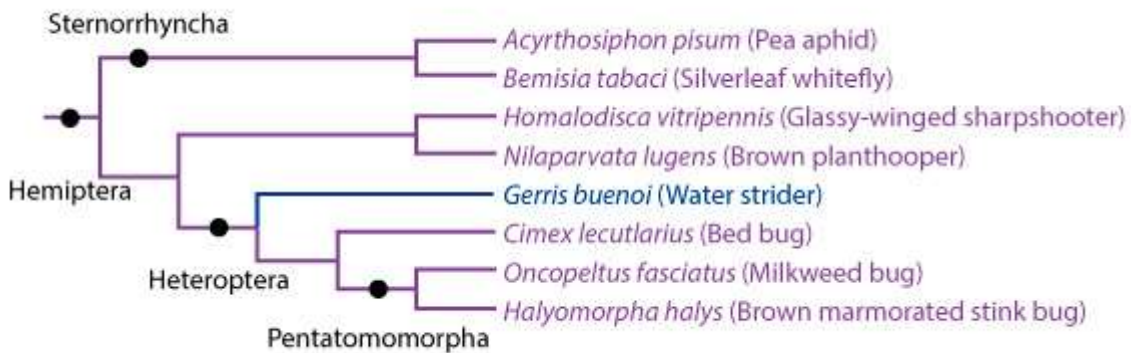

825 Supplementary Figure 1 : Detailed cladogram of Hemiptera species used in Figure 3. The tree is  
 826 based on phylogenetic analyses in [157]. Both trees combined with the absence of third InR copy  
 827 in *C. lectularius*, *O. fasciatus* and *H. halys*, suggest that InR1-like duplication is unique to the  
 828 Gerromorpha and occurred at, or close to, their speciation.

829

830

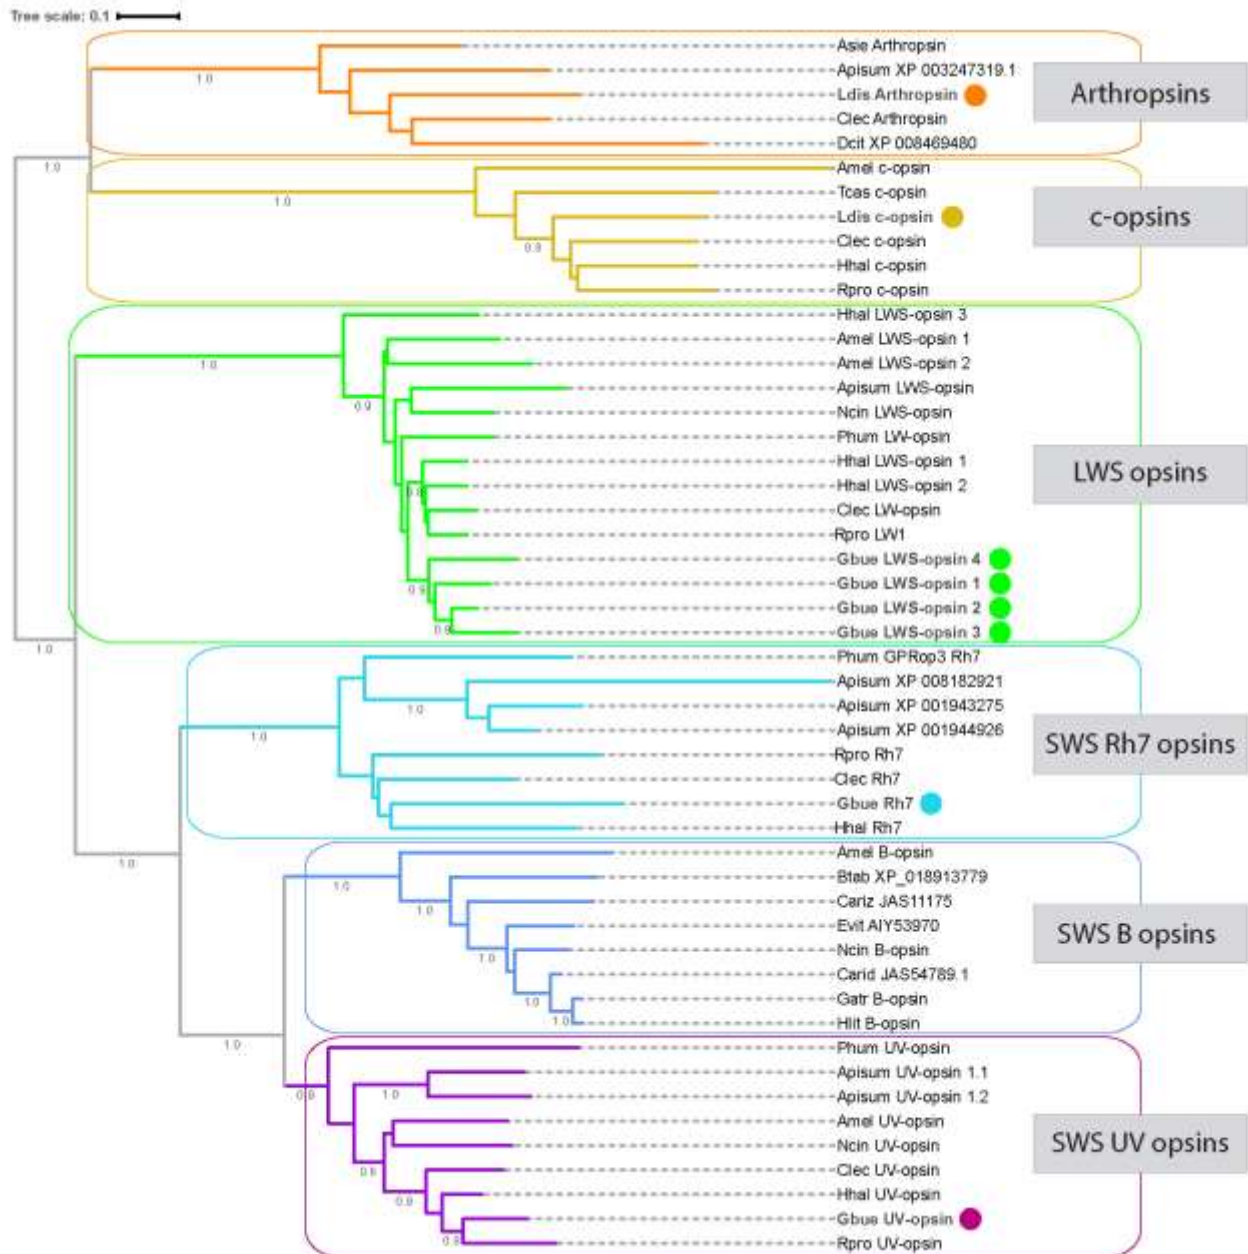

831

Supplementary Figure 2 : Phylogenetic analysis and representative sequences from all major insect opsin subfamilies. Protein sequences were aligned with T-Coffee [158] and ambiguous multiple alignment alignment segments were removed applying the “gappyout” setting of TrimAl (v. 1.3) [159]. A neighbor joining tree was estimated in MEGA version 6.0 [160] using gamma-corrected Jones-Taylor-Thornton distances [161] and testing branch support with 1 000 bootstrap samples (numbers at branches). Species abbreviations: Amel = *Apis mellifera*, Apisum = *Acyrtosiphon pisum*, Asie = *Anotogaster sieboldii*, Btab = *Bemisia tabaci*, Cariz = *Clastoptera arizonana*, Clec = *Cimex lectularius*, Carid = *Cuerna arida*, Dcit = *Diaphorina citris*, Evit = *Empoasca vitis*, Gbue = *Gerris buenoi*, Gatr = *Graphocephala atropunctata*, Hhal = *Halyomorpha halys*, Hlit = *Homalodisca liturata*, Ldis = *Limnoporus dissortis*, Ncin = *Nephotettix cincticeps*, Phum = *Pediculus humanus*, Rpro = *Rhodnius prolixus*, Tcas = *Tribolium castaneum*.

832

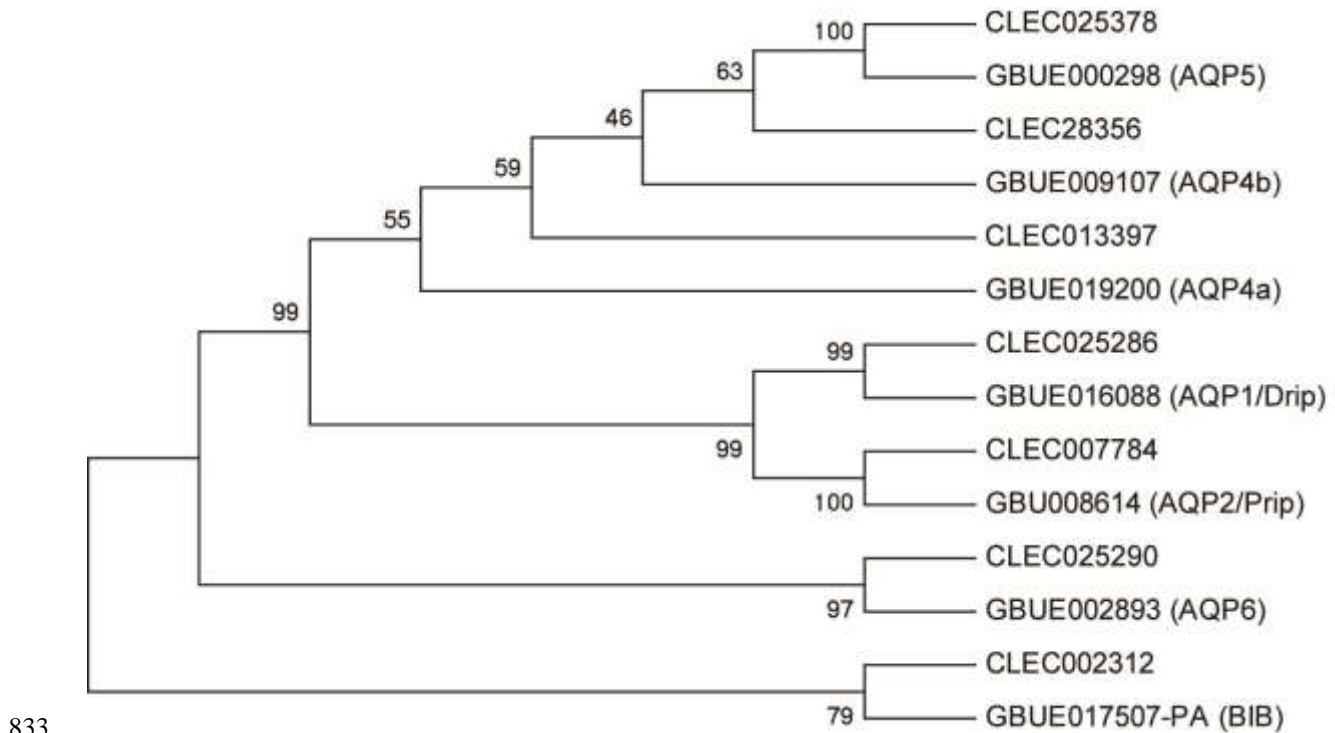

Supplementary Figure 3 : Comparison of predicted aquaporins from *Gerris* and *Cimex* using Neighbor-joining tree produced using MEGA6 using Dayhoff model and pairwise matching; branch values indicate support following 1500 bootstraps; values below 50% are omitted. It includes the seven putative aquaporin (AQP) genes identified from the water strider that includes the typical *Drosophila* integral protein (Drip), AQP2, AQP4 (Two genes), AQP5, AQP6 and Big brain (Bib) genes. In addition to these seven, we identified one other predicted partial sequences with matches to AQP sequences from other insects. Overall the number of aquaporins falls within the range of most insects (6-8) and *Gerris* has members of each group previously identified for insects [81].

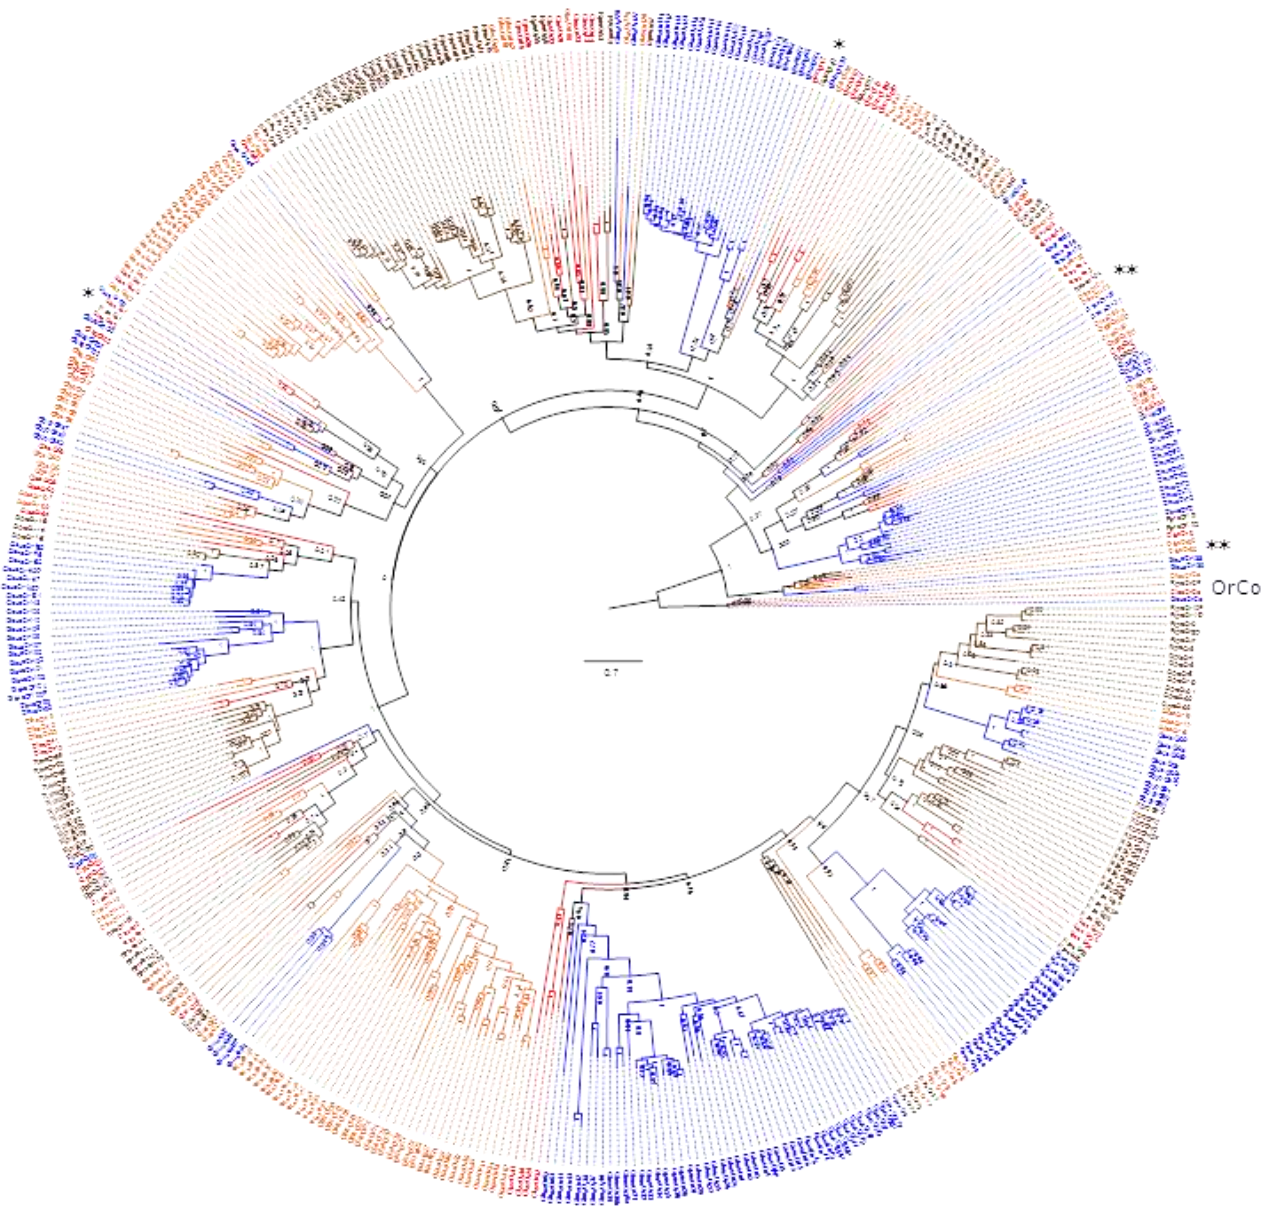

B.



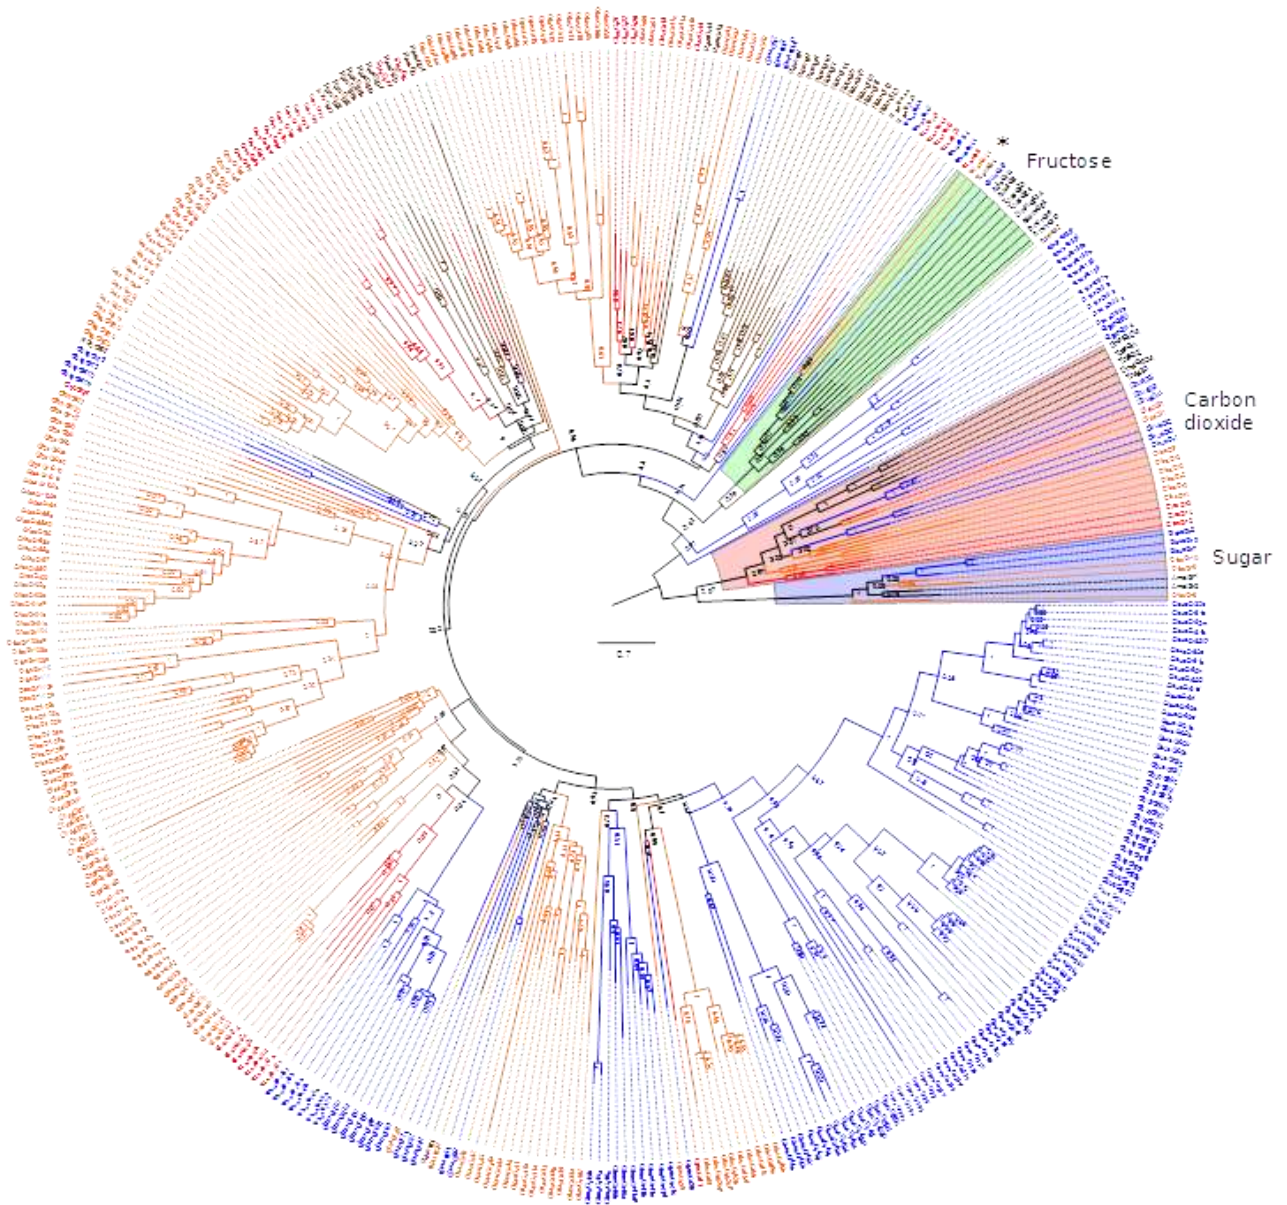

C.

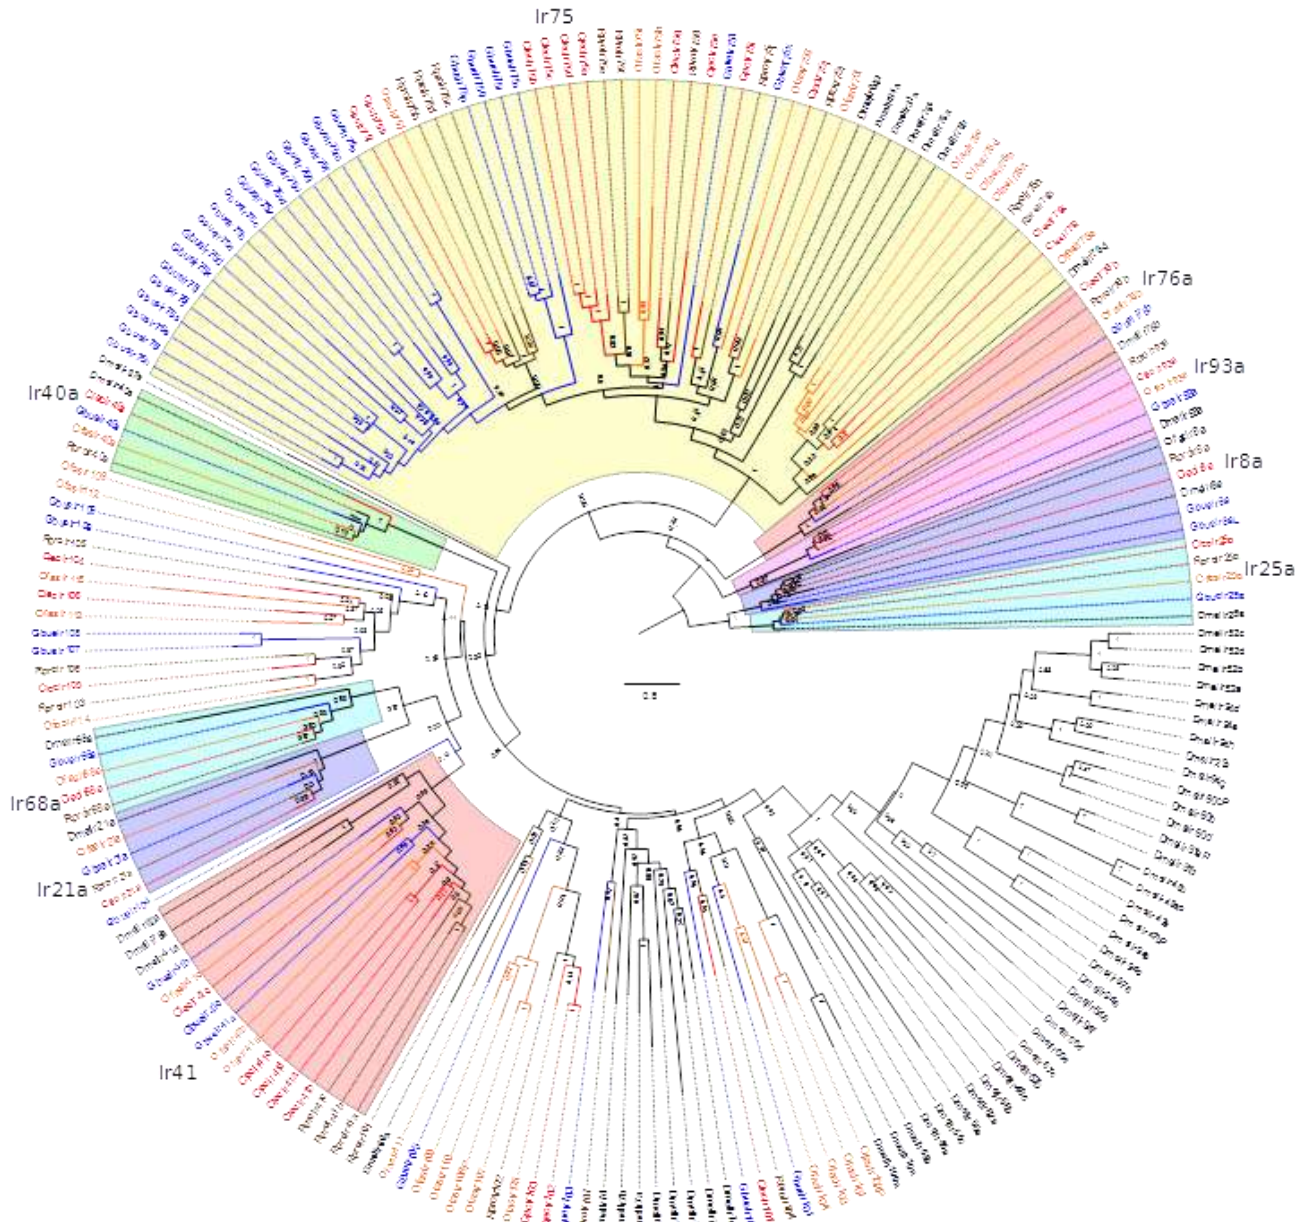

Supplementary Figure 4 : Phylogenetic analysis of the Chemoreceptor families. **(A) Olfactory Receptor family.** The tree was rooted with the highly conserved and basal OrCo proteins. A single asterisk indicates possible simple orthologous relationships and two asterices indicate slightly more complicated relationships involving independent duplications in one or more species. Protein names and the branches leading to them are colored in blue for *Gerris*, brown for *Rhodnius*, red for *Cimex*, and orange for *Oncopeltus*. A suffix of P after the protein number indicates a pseudogene, while alternatively-spliced ORs are indicated by lower case letters after the protein number. Support for nodes is the aLRT value from PhyML v3.0. **(B) Gustatory Receptor family.** The tree was rooted with the conserved sugar and carbon dioxide receptor subfamilies. These two subfamilies and the fructose receptor subfamily are highlighted by colored background wedges. **(C) Ionotropic Receptor family.** The tree was rooted with the conserved co-receptor Ir8a and 25a lineages, which closely resemble the ionotropic glutamate receptors from which these variant Ionotropic Receptors evolved. The entire *D. melanogaster* IR repertoire was included for comparison. Lower case suffixes do not indicate alternative-splicing, but rather either orthology with particular *Drosophila* IRs, or the Ir41 and 75 series of genes.



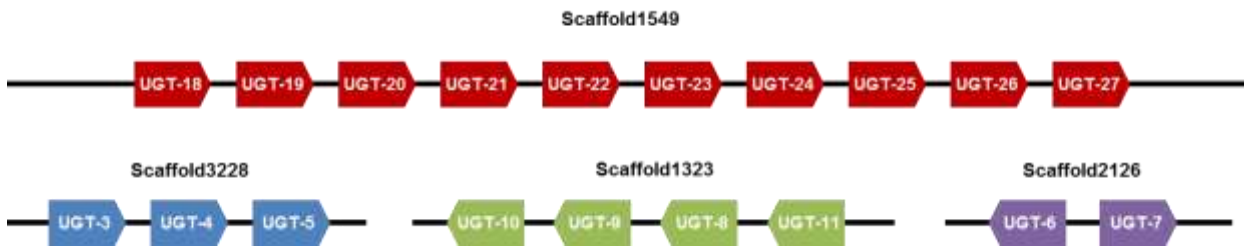

Supplementary Figure 5 : Genomic orientation of UGT genes in a *Gerris buenoi* genomic scaffold. Ten UGT genes are arrayed in a row in Scaffold1549, probably multiplied by gene duplication events.

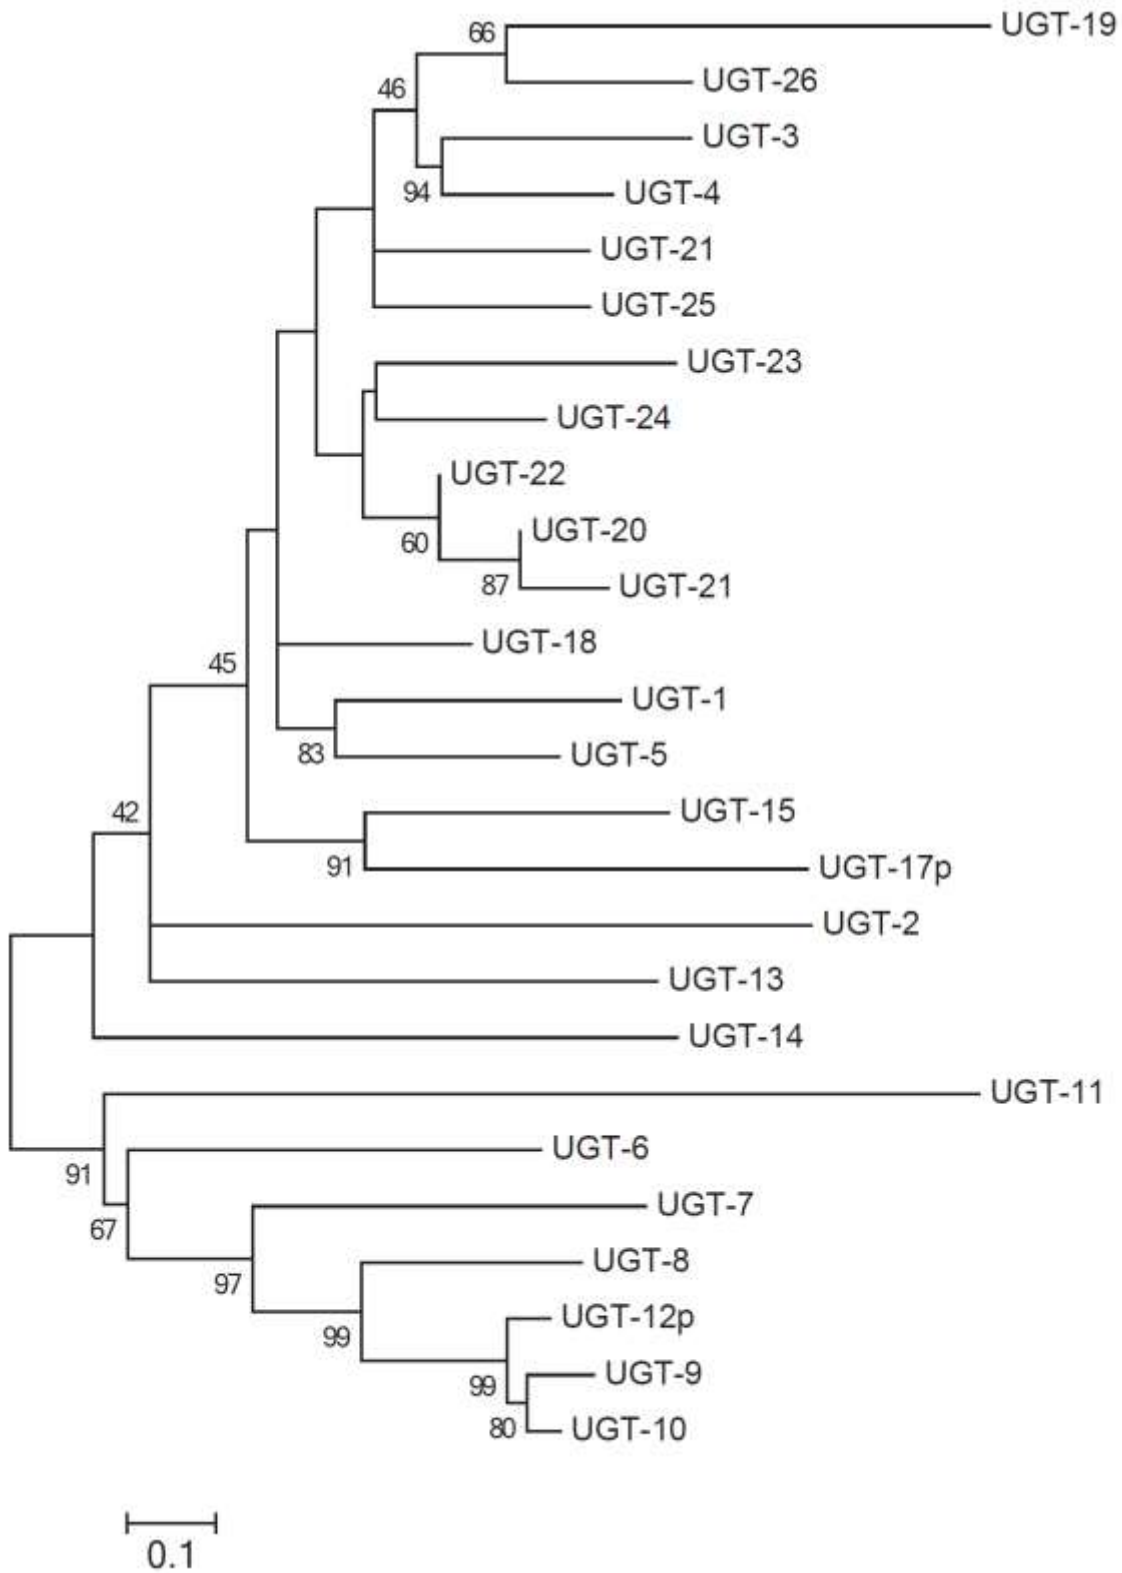

Supplementary Figure 6 : A consensus Maximum-likelihood tree of C-terminal half of the deduced amino acid sequences of *Gerris buenoi* UGTs. The phylogeny was inferred by the method based on the JTT matrix-based model. Bootstrap value was 1 000.

836

837

838

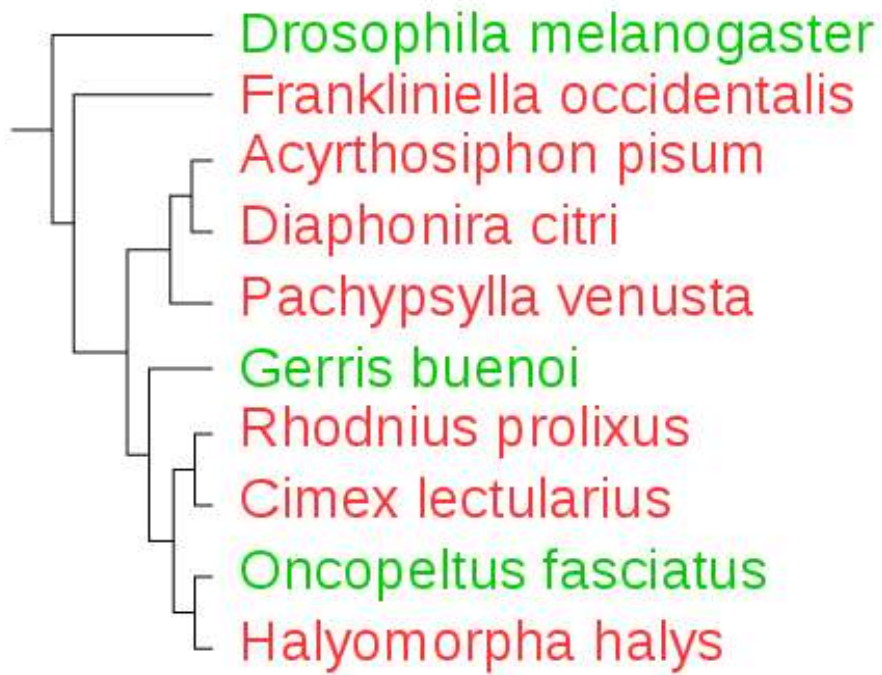

839

Supplementary Figure 7 : Simplified cladogram of Hemiptera based on [157] depicting IMD presence (green) and absence (red).

840

841

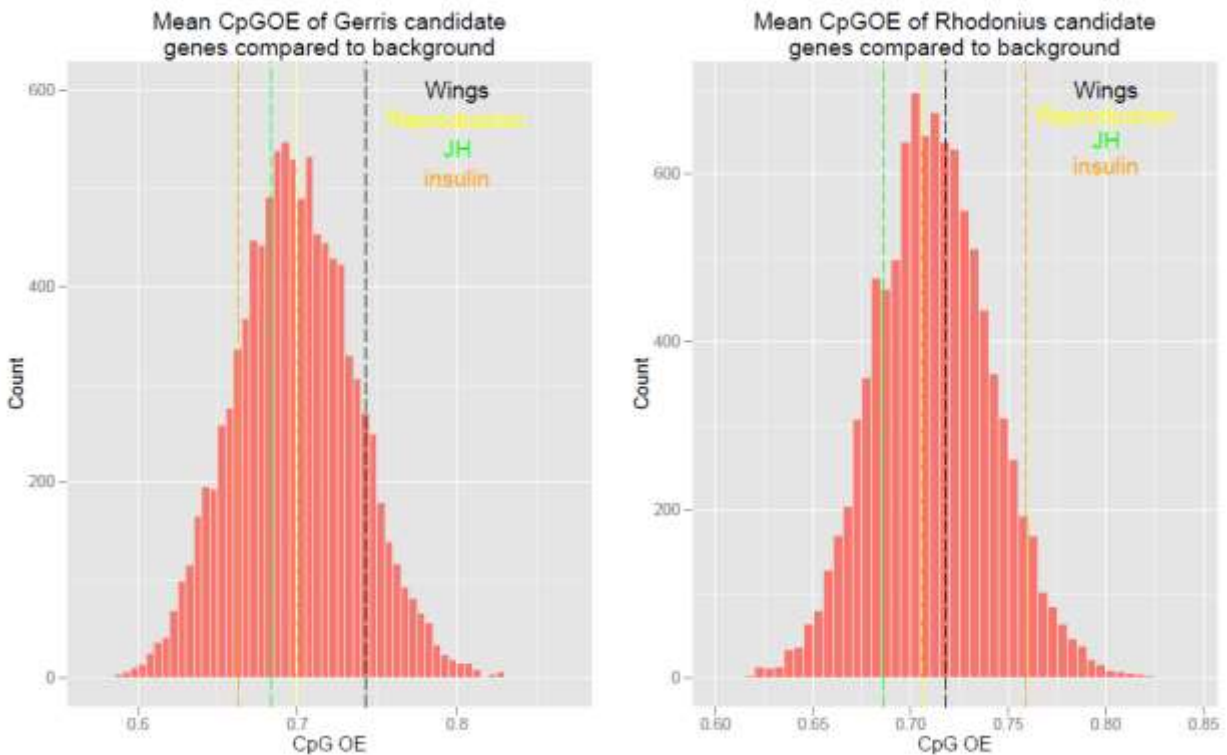

842

Supplementary Figure 8 : Density plot of frequency (y-axis) versus mean CpG<sub>O/E</sub> (x-axis) for (A) *Gerris buenoi* (n = 20 949; overall mean = 0.70; mean of wing genes = 0.74; mean of juvenile hormone genes = 0.68; mean of insulin signalling genes = 0.66; mean of reproduction genes = 0.70; p > 0.05) and (B) *Rhodnius prolixus* (n = 15 081; overall mean = 0.71; mean of wing genes = 0.72; mean of juvenile hormone genes = 0.69; mean of insulin signalling genes = 0.76; mean of reproduction genes = 0.71; p > 0.05). The observed mean for genes in the networks underlying wing polyphenism (black line), reproduction (yellow line), juvenile hormone (green line), and insulin signalling (orange line) plotted relative to the distribution of CpG<sub>O/E</sub> values for all genes in the genome (random resampling of mean CpG<sub>O/E</sub> from 50 genes in the genome).

843

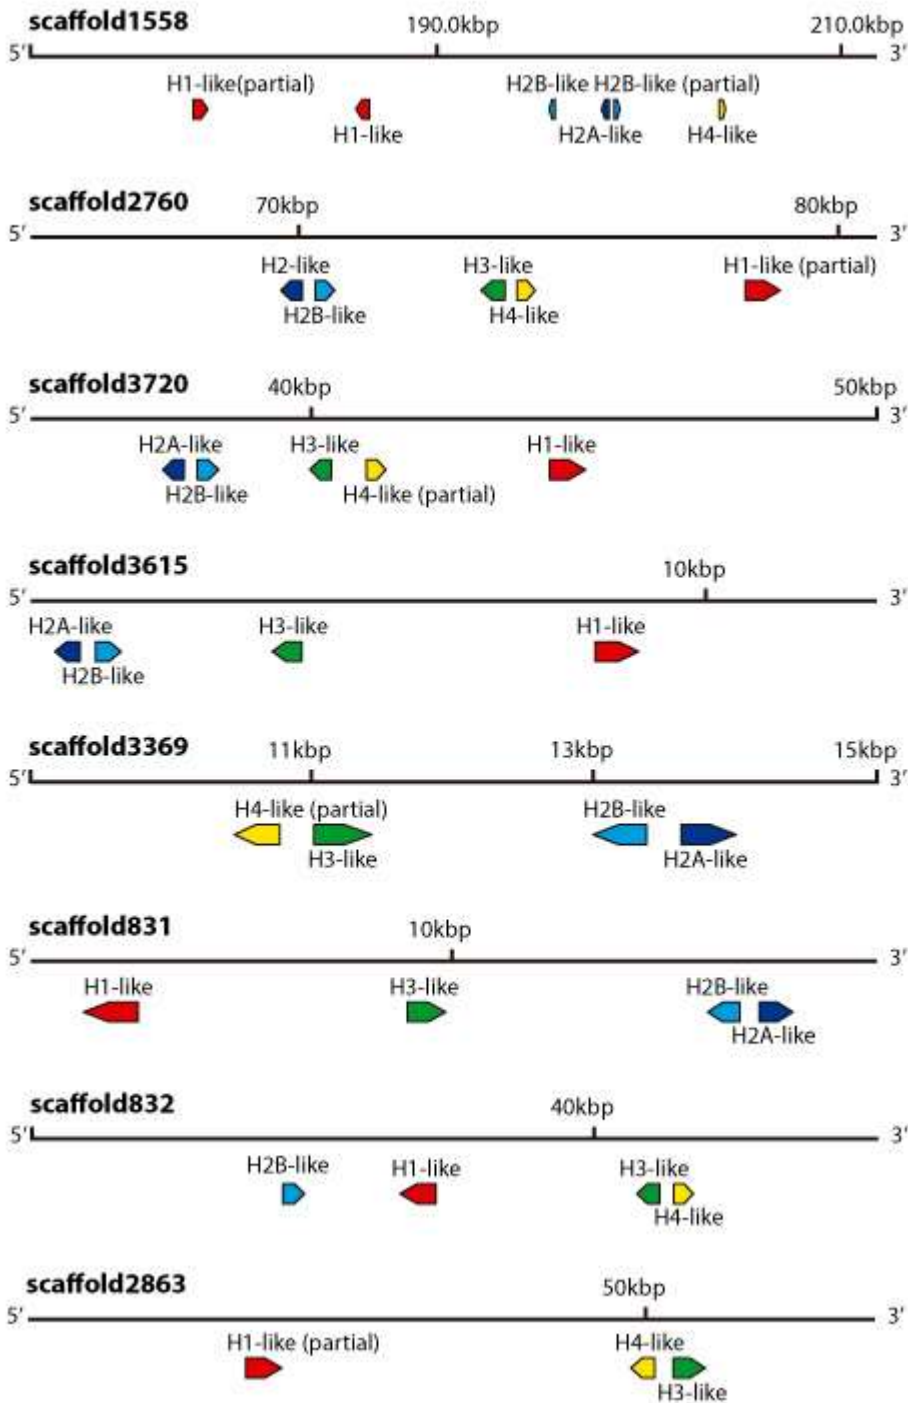

Supplementary Figure 9 : Genomic organisation of the histone loci gene clusters annotated in the *Gerris buenoi* genome. Clusters were defined as more than one histone encoding gene present on a genomic scaffold. No clusters were found that were interrupted by non-histone gene encoding loci. Clusters were visualized using genomertools v1.5.5 and coloured according to orthology group (Histone H1 (red), Histone H2A (dark blue), Histone H2B (light blue), Histone H3 (green), Histone H4 (yellow)).

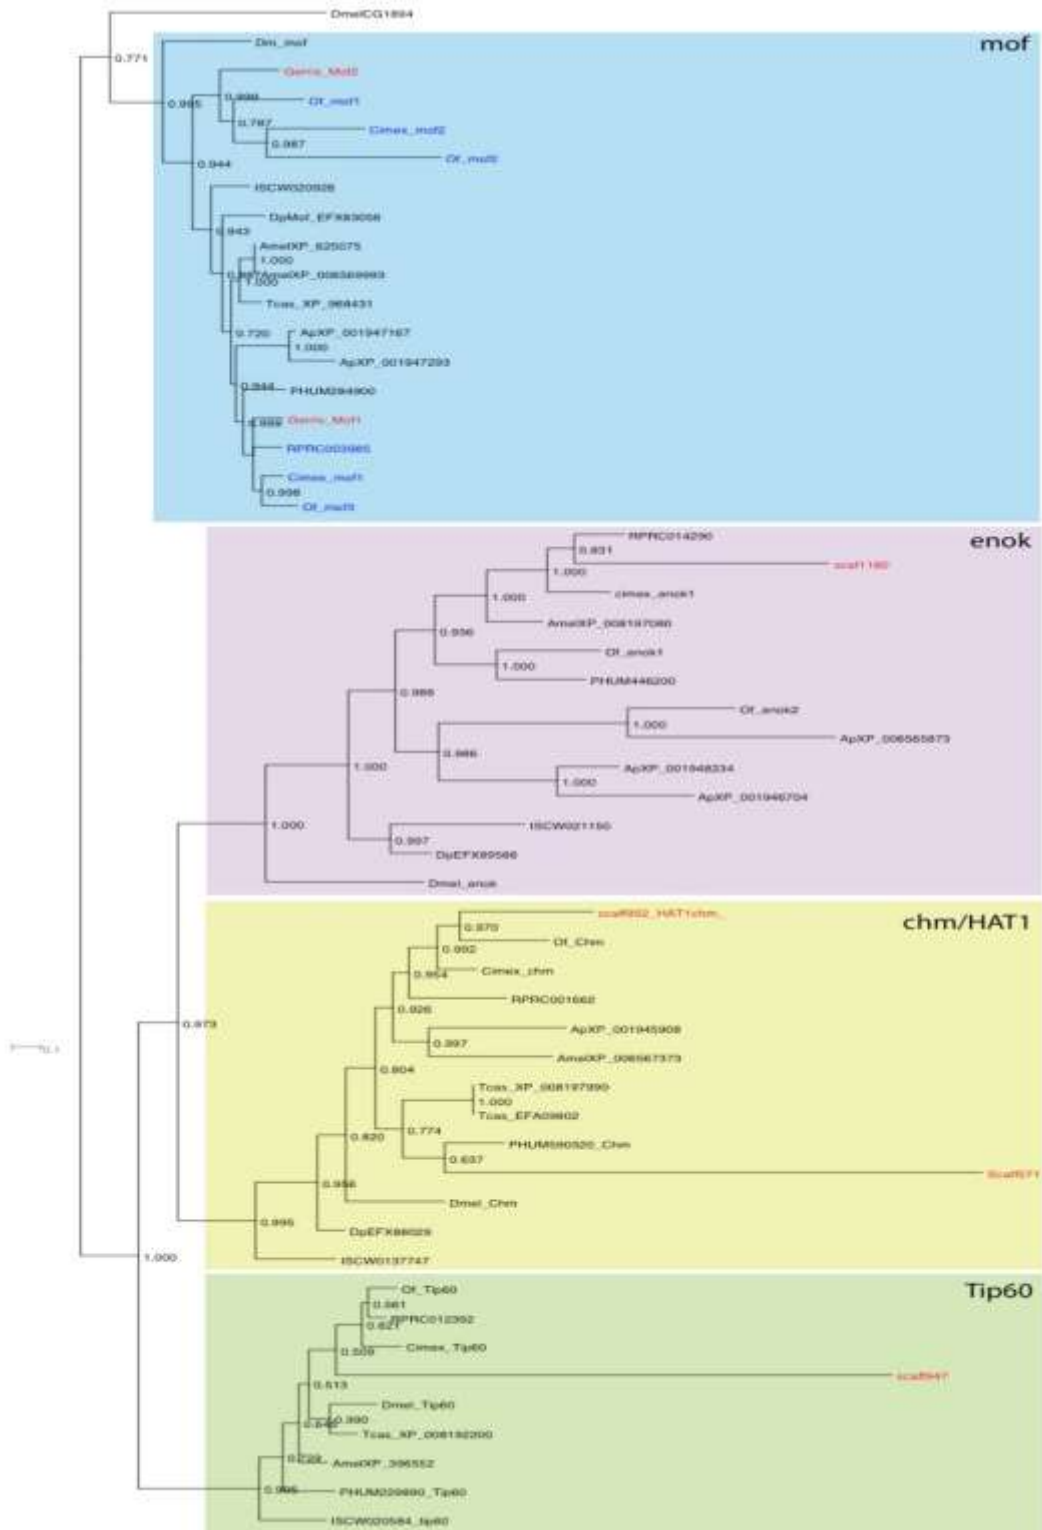

Supplementary Figure 10 : Phylogeny of histone acetyltransferases in Heteropteran lineage. Results show a duplication of *males absent on the first (mof)* and *chameau (chm/HAT1)* in *Gerris buenoi* similar to previous results in *Oncopeltus fasciatus* [9] and *Cimex lectularius* [81] but also a unique duplication of *Gerris buenoi* histone deacetylase *Sirt1 (sir2)* and *Sirt5*; and the histone methyltransferase *grappa*.

|       |                             |
|-------|-----------------------------|
| 1 739 | Complete Single-copy BUSCOs |
| 81    | - of which duplicated       |
| 490   | Fragmented BUSCOs           |
| 446   | Missing BUSCOs              |
| 2 675 | Total BUSCO groups searched |

Supplementary Table 1 : Summarized benchmarks in BUSCO notation

|                                | Complete | - of which duplicated | Fragmented | Missing |
|--------------------------------|----------|-----------------------|------------|---------|
| <i>Drosophila melanogaster</i> | 98       | 6,4                   | 0.6        | 0.3     |
| <i>Danaus plexipus</i>         | 83       | 8.6                   | 11         | 4.3     |
| <i>Apis mellifera</i>          | 93       | 2.9                   | 5.1        | 0.9     |
| <i>Pediculus humanus</i>       | 92       | 3.9                   | 6.1        | 1.6     |
| <i>Daphnia pulex</i>           | 83       | 3.9                   | 11         | 5.1     |
| <i>Tribolium castaneum</i>     | 95       | 5.8                   | 3.9        | 0.8     |
| <i>Acyrtosiphon pisum</i>      | 72       | 6.1                   | 15         | 12      |
| <i>Cimex lectularius</i>       | 78       | 9.7                   | 1,4        | 7.4     |
| <i>Gerris buenoi</i>           | 65       | 3.02                  | 18.32      | 16.67   |

Supplementary Table 2 : BUSCO Genome assessment based on percentage of BUSCO genes identified (<ftp://cegg.unige.ch/OrthoDB7/BUSCO/README.txt>). Species results other than *Gerris buenoi* extracted from supplementary data in [81].

| Gene                       | Scaffold: start..end                   | Locus length (nt)  | Protein length (aa)   | Number of CDS exons |
|----------------------------|----------------------------------------|--------------------|-----------------------|---------------------|
| <i>labial -part 1 of 2</i> | Scaffold2148:49081..49463              | 383<br>(partial)   | 208<br>(concatenated) | 2<br>(concatenated) |
| <i>labial -part 2 of 2</i> | Scaffold688:18951..20594               | 1 644<br>(partial) |                       |                     |
| <i>proboscipedia</i>       | Scaffold917:82996..178853<br>- strand  | 95 858             | 498                   | 3                   |
| <i>zerknüllt</i>           | Scaffold917:254614..264809<br>+ strand | 10 196             | 360                   | 3                   |
| <i>Deformed</i>            | Scaffold927:71079..127936              | 56 858             | 339                   | 2                   |
| <i>Sex combs reduced</i>   | Scaffold111:113209..227662<br>- strand | 114 454            | 279                   | 2                   |
| <i>fushi tarazu</i>        | Scaffold111:292364..296153<br>- strand | 3 790              | 298                   | 2                   |
| <i>Antennapedia</i>        | Scaffold111:608939..620195<br>- strand | 11 257             | 284                   | 2                   |
| <i>Ultrabithorax*</i>      | Scaffold280:506616..507456             | 841<br>(partial)   | 178<br>(partial)      | 1<br>(partial)      |
| <i>abdominal-A</i>         | Scaffold259:352274..461324             | 109 051            | 320                   | 3                   |
| <i>Abdominal-B*</i>        | Scaffold464:255292..399249             | 143 958            | 254<br>(partial)      | 2<br>(partial)      |
| <i>iroquois</i>            | Scaffold451:304431-432356              | 127 926            | 426                   | 6                   |
| <i>mirror</i>              | Scaffold2206:85783-151112              | 65 330             | 362                   | 5                   |

Supplementary Table 3 : Positional information for the annotated homeobox genes. Incomplete gene models are marked with an asterisk (\*). Colored shading highlights gene linkage, and coding strand is also indicated for these gene models.



| <b>Gene name</b>                          | <b>Gene abbreviation</b> | <b><i>Gerris buenoi</i></b> | <b><i>Oncopeltus fasciatus</i></b> | <b><i>Cimex lectularius</i></b> |
|-------------------------------------------|--------------------------|-----------------------------|------------------------------------|---------------------------------|
| <b><i>abrupt</i></b>                      | <i>ab</i>                | Yes                         | Yes                                | Yes                             |
| <b><i>Achaete-scute complex</i></b>       | <i>ac</i>                | Yes                         | No                                 | No                              |
| <b><i>Actin 5C</i></b>                    | <i>Act5C</i>             | Yes                         | Yes                                | Yes                             |
| <b><i>amphiphysin</i></b>                 | <i>Amph</i>              | Yes                         | Yes                                | Yes                             |
| <b><i>aralar1</i></b>                     | <i>aralar1</i>           | Yes                         | Yes                                | Yes                             |
| <b><i>arrow</i></b>                       | <i>arr</i>               | Yes                         | Yes                                | Yes                             |
| <b><i>Asense</i></b>                      | <i>ase</i>               | No                          | Yes                                | No                              |
| <b><i>astray</i></b>                      | <i>aay</i>               | Yes                         | Yes                                | Yes                             |
| <b><i>bantam</i></b>                      | <i>ban</i>               | No                          | No                                 | No                              |
| <b><i>beadex</i></b>                      | <i>Bx</i>                | Yes                         | Yes                                | Yes                             |
| <b><i>bendless</i></b>                    | <i>ben</i>               | Yes                         | Yes                                | Yes                             |
| <b><i>bifocal</i></b>                     | <i>bif</i>               | Yes                         | No                                 | No                              |
| <b><i>bonus</i></b>                       | <i>bon</i>               | Yes                         | No                                 | Yes                             |
| <b><i>buttonless</i></b>                  | <i>btn</i>               | No                          | No                                 | No                              |
| <b><i>calreticulin</i></b>                | <i>Crc</i>               | Yes                         | Yes                                | Yes                             |
| <b><i>capricious</i></b>                  | <i>caps</i>              | Yes                         | Yes                                | Yes                             |
| <b><i>caupolican</i></b>                  | <i>caup</i>              | No                          | Yes                                | Yes                             |
| <b><i>center divider</i></b>              | <i>cdi</i>               | Yes                         | Yes                                | Yes                             |
| <b><i>cornetto</i></b>                    | <i>corn</i>              | No                          | Yes                                | No                              |
| <b><i>corto</i></b>                       | <i>corto</i>             | No                          | No                                 | No                              |
| <b><i>couch potato</i></b>                | <i>cpo</i>               | Yes                         | Yes                                | Yes                             |
| <b><i>crooked legs</i></b>                | <i>crol</i>              | No                          | Yes                                | Yes                             |
| <b><i>dacapo</i></b>                      | <i>dap</i>               | No                          | Yes                                | No                              |
| <b><i>dalmatian</i></b>                   | <i>dmt</i>               | No                          | No                                 | No                              |
| <b><i>Darkener of apricot</i></b>         | <i>Doa</i>               | No                          | Yes                                | Yes                             |
| <b><i>daughterless</i></b>                | <i>da</i>                | Yes                         | Yes                                | No                              |
| <b><i>deadpan</i></b>                     | <i>dpn</i>               | Yes                         | Yes                                | Yes                             |
| <b><i>Delta</i></b>                       | <i>DI</i>                | No                          | Yes                                | Yes                             |
| <b><i>diminutive</i></b>                  | <i>dm</i>                | No                          | No                                 | No                              |
| <b><i>division abnormally delayed</i></b> | <i>dally</i>             | No                          | Yes                                | Yes                             |
| <b><i>dorsotonals (homothorax)</i></b>    | <i>hth</i>               | No                          | Yes                                | Yes                             |
| <b><i>E(spl) region transcript m7</i></b> | <i>E(spl)m7-HLH</i>      | Yes                         | Yes                                | Yes                             |
| <b><i>E2F transcription factor</i></b>    | <i>E2f</i>               | Yes                         | Yes                                | Yes                             |
| <b><i>Eb1</i></b>                         | <i>Eb1</i>               | Yes                         | Yes                                | Yes                             |

|                                    |                     |     |     |     |
|------------------------------------|---------------------|-----|-----|-----|
| <i>effete</i>                      | <i>eff</i>          | Yes | No  | No  |
| <i>egghead</i>                     | <i>egh</i>          | Yes | Yes | Yes |
| <i>enabled</i>                     | <i>ena</i>          | Yes | Yes | Yes |
| <i>Enhancer-of-split</i>           | <i>E(spl)m8-HLH</i> | No  | Yes | Yes |
| <i>EP2237 (cabut)</i>              | <i>cbt</i>          | Yes | No  | Yes |
| <i>escargot</i>                    | <i>esg</i>          | Yes | No  | Yes |
| <i>extra macrochaetae</i>          | <i>emc</i>          | Yes | Yes | Yes |
| <i>flightless</i>                  | <i>flil</i>         | Yes | Yes | Yes |
| <i>frizzled</i>                    | <i>fz</i>           | Yes | Yes | Yes |
| <i>frizzled 2</i>                  | <i>fz2</i>          | Yes | Yes | Yes |
| <i>ftz transcription factor 1</i>  | <i>ftz-f1</i>       | No  | Yes | Yes |
| <i>gliolectin</i>                  | <i>glec</i>         | No  | No  | No  |
| <i>gliotactin</i>                  | <i>Gli</i>          | No  | No  | Yes |
| <i>Glutathione S transferase 2</i> | <i>GstS1</i>        | Yes | Yes | Yes |
| <i>grapes</i>                      | <i>grp</i>          | Yes | Yes | Yes |
| <i>groucho</i>                     | <i>gro</i>          | Yes | Yes | Yes |
| <i>Hairless</i>                    | <i>H</i>            | Yes | Yes | Yes |
| <i>hairy</i>                       | <i>h</i>            | Yes | Yes | Yes |
| <i>headcase</i>                    | <i>hdc</i>          | Yes | Yes | Yes |
| <i>hephaestus</i>                  | <i>heph</i>         | Yes | Yes | Yes |
| <i>Hormone receptor-like in 39</i> | <i>Hr39</i>         | No  | Yes | Yes |
| <i>IGF-II mRNA-binding protein</i> | <i>Imp</i>          | Yes | Yes | Yes |
| <i>kekkon-1</i>                    | <i>kek1</i>         | Yes | Yes | Yes |
| <i>kuzbanian</i>                   | <i>kuz</i>          | Yes | Yes | Yes |
| <i>Laminin A</i>                   | <i>LanA</i>         | Yes | Yes | Yes |
| <i>lethal (1) G0007</i>            | <i>l(1)G0007</i>    | Yes | Yes | Yes |
| <i>liquid facets</i>               | <i>lqf</i>          | Yes | Yes | Yes |
| <i>lola like</i>                   | <i>lolal</i>        | Yes | Yes | Yes |
| <i>longitudinals lacking</i>       | <i>lola</i>         | Yes | Yes | Yes |
| <i>melted</i>                      | <i>melt</i>         | Yes | Yes | Yes |
| <i>mushroom body defect</i>        | <i>mud</i>          | No  | No  | No  |
| <i>nebbish</i>                     | <i>neb</i>          | Yes | Yes | No  |
| <i>nejire</i>                      | <i>nej</i>          | Yes | Yes | Yes |
| <i>neuralized</i>                  | <i>neur</i>         | Yes | Yes | Yes |
| <i>notch</i>                       | <i>N</i>            | Yes | Yes | Yes |
| <i>nuclear fallout</i>             | <i>nuf</i>          | No  | No  | No  |
| <i>pavarotti</i>                   | <i>pav</i>          | Yes | Yes | Yes |

|                                         |                 |     |     |     |
|-----------------------------------------|-----------------|-----|-----|-----|
| <i>pebble</i>                           | <i>pbl</i>      | Yes | Yes | Yes |
| <i>pipsqueak</i>                        | <i>psq</i>      | Yes | Yes | Yes |
| <i>pointed</i>                          | <i>pnt</i>      | Yes | Yes | Yes |
| <i>Poly(ADP-ribose) glycohydrolase</i>  | <i>Parg</i>     | Yes | Yes | Yes |
| <i>polychaetoid</i>                     | <i>pyd</i>      | Yes | Yes | Yes |
| <i>prospero</i>                         | <i>pros</i>     | Yes | Yes | Yes |
| <i>Protein kinase 61C</i>               | <i>Pdk1</i>     | Yes | Yes | Yes |
| <i>Protein tyrosine phosphatase 10D</i> | <i>Ptp10D</i>   | Yes | Yes | Yes |
| <i>pumilio</i>                          | <i>pum</i>      | Yes | Yes | Yes |
| <i>pxb</i>                              | <i>pxb</i>      | No  | No  | No  |
| <i>quemao</i>                           | <i>qm</i>       | Yes | Yes | Yes |
| <i>Ras oncogene at 85D</i>              | <i>Ras85D</i>   | No  | Yes | Yes |
| <i>Ras-like protein A</i>               | <i>Rala</i>     | Yes | No  | No  |
| <i>raspberry</i>                        | <i>ras</i>      | Yes | Yes | Yes |
| <i>Rhomboid</i>                         | <i>rho</i>      | Yes | Yes | Yes |
| <i>Ribosomal protein S5</i>             | <i>RpS5a</i>    | Yes | Yes | Yes |
| <i>roundabout</i>                       | <i>robo</i>     | Yes | Yes | Yes |
| <i>rutabaga</i>                         | <i>rut</i>      | No  | Yes | Yes |
| <i>sanpodo</i>                          | <i>spdo</i>     | Yes | Yes | Yes |
| <i>scabrous</i>                         | <i>sca</i>      | Yes | Yes | Yes |
| <i>scalloped</i>                        | <i>sd</i>       | Yes | Yes | Yes |
| <i>scratch</i>                          | <i>scrt</i>     | Yes | Yes | No  |
| <i>scribbled</i>                        | <i>scrib</i>    | Yes | Yes | Yes |
| <i>scribbler</i>                        | <i>sbb</i>      | Yes | Yes | Yes |
| <i>scute</i>                            | <i>sc</i>       | No  | Yes | Yes |
| <i>seven up</i>                         | <i>svp</i>      | Yes | Yes | Yes |
| <i>shaggy</i>                           | <i>sgg</i>      | Yes | Yes | Yes |
| <i>singed</i>                           | <i>sn</i>       | Yes | Yes | Yes |
| <i>smooth</i>                           | <i>sm</i>       | Yes | Yes | Yes |
| <i>Sp1</i>                              | <i>Sp1</i>      | No  | Yes | No  |
| <i>SP71 (Trynity)</i>                   | <i>Tyn</i>      | Yes | Yes | Yes |
| <i>spitz</i>                            | <i>spi</i>      | No  | No  | No  |
| <i>split ends</i>                       | <i>spen</i>     | Yes | Yes | Yes |
| <i>string</i>                           | <i>stg</i>      | Yes | Yes | Yes |
| <i>sugarless</i>                        | <i>sgl</i>      | Yes | Yes | Yes |
| <i>taranis</i>                          | <i>tara</i>     | Yes | Yes | Yes |
| <i>Tcp-1eta</i>                         | <i>Tcp-1eta</i> | Yes | Yes | Yes |

|                                                            |                |     |     |     |
|------------------------------------------------------------|----------------|-----|-----|-----|
| <b><i>Tollo</i></b>                                        | <i>Tollo</i>   | Yes | Yes | Yes |
| <b><i>tout-velu</i></b>                                    | <i>ttv</i>     | No  | Yes | Yes |
| <b><i>tramtrack</i></b>                                    | <i>ttk</i>     | Yes | Yes | Yes |
| <b><i>Trehalose receptor 1 (Trapped in endoderm 1)</i></b> | <i>Tre1</i>    | No  | Yes | No  |
| <b><i>tribbles</i></b>                                     | <i>trbl</i>    | Yes | Yes | Yes |
| <b><i>tweety</i></b>                                       | <i>tty</i>     | Yes | Yes | Yes |
| <b><i>Twin of m4</i></b>                                   | <i>Tom</i>     | No  | No  | No  |
| <b><i>u-turn (ventral veins lacking)</i></b>               | <i>wl</i>      | Yes | Yes | Yes |
| <b><i>Ubiquitin activating enzyme 1</i></b>                | <i>Uba1</i>    | Yes | Yes | Yes |
| <b><i>Ubiquitin conjugating enzyme 2</i></b>               | <i>UbcD2</i>   | Yes | Yes | No  |
| <b><i>Vacuolar H+ ATPase 16kD subunit</i></b>              | <i>Vha16-1</i> | Yes | Yes | Yes |
| <b><i>β-amyloid protein precursor-like</i></b>             | <i>Appl</i>    | Yes | Yes | Yes |

Supplementary Table 4 : Annotation of genes involved in bristle number and neural development based on *Drosophila melanogaster* quantitative analyses [162].

846

| <b>Species</b>                | <b>Order</b> | <b>Suborder</b> | <b>LWS</b> | <b>SWS-B</b> | <b>SWS-UV</b> | <b>Rh7</b> | <b>Arthropsin</b> | <b>c-Opsin</b> |
|-------------------------------|--------------|-----------------|------------|--------------|---------------|------------|-------------------|----------------|
| <i>Gerris buenoi</i>          | Hemiptera    | Heteroptera     | 4          | -            | 1             | 1          | 1                 | 1              |
| <i>Cimex lectularius</i>      | Hemiptera    | Heteroptera     | 1          | -            | 1             | 1          | -                 | 1              |
| <i>Rhodnius prolixus</i>      | Hemiptera    | Heteroptera     | 1          | -            | 1             | 1          | -                 | 1              |
| <i>Acyrtosiphon pisum</i>     | Hemiptera    | Sternorrhyncha  | 1          | -            | 2             | 4          | 1                 | 1              |
| <i>Megoura viciae</i>         | Hemiptera    | Sternorrhyncha  | 1          | -            | 1             | na         | na                | na             |
| <i>Nephotettix cincticeps</i> | Hemiptera    | Auchenorrhyncha | 1          | 1            | 1             | na         | na                | na             |

Supplementary Table 5 : Opsin conservation in Hemiptera. [80, 81, 163-165]

| Species                        | CPR_RR-1 | CPR_RR-2 | CPR_Uncl | CPAP1 | CPAP3 | CPF | TWDL | Total |
|--------------------------------|----------|----------|----------|-------|-------|-----|------|-------|
| <i>Drosophila melanogaster</i> | 61       | 42       | 34       | 29    | 10    | 5   | 29   | 210   |
| <i>Glossina morsitans</i>      | 33       | 27       | 17       | 11    | 6     | 1   | 9    | 104   |
| <i>Culex quinquefasciatus</i>  | 49       | 97       | 30       | 10    | 8     | 5   | 9    | 208   |
| <i>Aedes aegypti</i>           | 66       | 150      | 28       | 14    | 9     | 3   | 6    | 276   |
| <i>Anopheles gambiae</i>       | 43       | 103      | 21       | 13    | 10    | 4   | 12   | 206   |
| <i>Bombyx mori</i>             | 47       | 78       | 19       | 13    | 6     | 1   | 4    | 168   |
| <i>Danaus plexippus</i>        | 47       | 57       | 18       | 16    | 10    | 1   | 5    | 154   |
| <i>Apis mellifera</i>          | 13       | 15       | 10       | 15    | 7     | 4   | 2    | 66    |
| <i>Nasonia vitripennis</i>     | 19       | 32       | 18       | 16    | 6     | 5   | 2    | 98    |
| <i>Pediculus humanus</i>       | 9        | 15       | 17       | 12    | 6     | 0   | 2    | 61    |
| <i>Daphnia pulex</i>           | 101      | 36       | 152      | 20    | 12    | 0   | 0    | 321   |
| <i>Tetranychus urticae</i>     | 0        | 7        | 31       | 14    | 5     | 0   | 0    | 57    |
| <i>Tribolium castaneum</i>     | 34       | 55       | 21       | 13    | 7     | 5   | 3    | 138   |
| <i>Acyrtosiphon pisum</i>      | 9        | 84       | 20       | 10    | 8     | 2   | 3    | 136   |
| <i>Cimex lectularius</i>       | 18       | 70       | 32       | 15    | 6     | 5   | 3    | 149   |
| <i>Gerris buenoi</i>           | 22       | 74       | 30       | 10    | 6     | 3   | 10   | 155   |

Supplementary Table 6 : Detection and classification of putative structural cuticular proteins. Information from other species than *Gerris buenoi* adapted from Ioannidou, et al. [153] and Benoit, et al. [81].

|    | <b>Scaffold #</b> | <b># Genes</b> | <b>Family</b>     | <b>Length (Kbp)</b> | <b>Density (Kbp/gene)</b> |
|----|-------------------|----------------|-------------------|---------------------|---------------------------|
| 1  | 431               | 14             | CPR RR-1/CPR Uncl | 398                 | 28.4                      |
| 2  | 32                | 13             | CPR RR-2          | 183                 | 14.1                      |
| 3  | 41                | 9              | CPR RR-2          | 92                  | 10.2                      |
| 4  | 349               | 8              | CPR RR-2          | 224                 | 27.9                      |
| 5  | 996               | 6              | CPR RR-2          | 73                  | 12.2                      |
| 6  | 683               | 4              | CPAP3             | 250                 | 62.5                      |
| 7  | 2496              | 4              | CPR RR-2/CPR Uncl | 92                  | 23.0                      |
| 8  | 46                | 3              | CPF               | 49                  | 16.2                      |
| 9  | 80                | 3              | TWDL              | 62                  | 20.6                      |
| 10 | 132               | 3              | CPR Uncl          | 249                 | 83.1                      |
| 11 | 706               | 3              | CPR Uncl          | 66                  | 21.9                      |

Supplementary Table 7 : Clusters of genes coding cuticle proteins in the genome of *Gerris buenoi*

847

848

|                                | <b>Ionotropic</b> | <b>Gustatory</b> | <b>Odorant</b> |
|--------------------------------|-------------------|------------------|----------------|
| <i>Gerris buenoi</i>           | 45/45             | 60/135           | 153/155        |
| <i>Oncopeltus fasciatus</i>    | 37/37             | 115/169          | 120/121        |
| <i>Rhodnius prolixus</i>       | 33/33             | 28/30            | 116/116        |
| <i>Cimex lectularius</i>       | 30/30             | 24/36            | 48/49          |
| <i>Drosophila melanogaster</i> | 65/65             | 60/68            | 60/62          |

Supplementary Table 8 : Numbers of genes and encoded proteins in three chemoreceptor families in heteropterans with genome sequences, and *Drosophila melanogaster* for comparison.

| Gene name | OGS name        | Genomic scaffold | Length (aa) | Remark   |
|-----------|-----------------|------------------|-------------|----------|
| UGT-01    | GBUE014547-RA   | Scaffold1506     | 530         | complete |
| UGT-02    | GBUE015333-RA   | Scaffold1907     | 515         | complete |
| UGT-03    | GBUE018966-RA   | Scaffold3228     | 533         | complete |
| UGT-04    | GBUE018967-RA   | Scaffold3228     | 515         | complete |
| UGT-05    | GBUE018968-RA   | Scaffold3228     | 543         | complete |
| UGT-06    | GBUE014164-RA   | Scaffold2126     | 524         | complete |
| UGT-07    | GBUE014165-RA   | Scaffold2126     | 527         | complete |
| UGT-08    | GBUE013499-RA-1 | Scaffold1323     | 529         | complete |
| UGT-09    | GBUE013499-RA-2 | Scaffold1323     | 512         | complete |
| UGT-10    | GBUE013499-RA-3 | Scaffold1323     | 527         | complete |
| UGT-11    | GBUE013500-RA   | Scaffold1323     | 218         | partial  |
| UGT-12p*  | GBUE019125-RA   | Scaffold3054     | 470         | partial  |
| UGT-13    | GBUE010586-RA   | Scaffold838      | 524         | complete |
| UGT-14    | GBUE012986-RA   | Scaffold1320     | 697         | complete |
| UGT-15    | GBUE013062-RA   | Scaffold1042     | 437         | partial  |
| UGT-16    | GBUE020555-RA   | Scaffold5464     | 326         | partial  |
| UGT-17p   | GBUE020560-RA   | Scaffold6284     | 243         | partial  |
| UGT-18    | GBUE012772-RA   | Scaffold1549     | 422         | partial  |
| UGT-19    | GBUE012773-RA   | Scaffold1549     | 347         | partial  |
| UGT-20    | GBUE012774-RA   | Scaffold1549     | 434         | partial  |
| UGT-21    | GBUE012775-RA   | Scaffold1549     | 201         | partial  |
| UGT-22    | GBUE012776-RA   | Scaffold1549     | 378         | partial  |
| UGT-23    | GBUE012777-RA   | Scaffold1549     | 522         | complete |
| UGT-24    | GBUE012778-RA   | Scaffold1549     | 540         | complete |
| UGT-25    | GBUE012779-RA   | Scaffold1549     | 519         | complete |
| UGT-26    | GBUE012780-RA   | Scaffold1549     | 534         | complete |
| UGT-27    | GBUE012781-RA   | Scaffold1549     | 529         | complete |
| UGT-28    | no OGS name     | Scaffold4983     | 235         | partial  |

Supplementary Table 9 : List of UDP-glycosyltransferase genes in *Gerris buenoi* genome. (\*refers to pseudogene.)

| Gene type  | Gene name            | Location [Accession#]                                    | Protein Length | Domains          |
|------------|----------------------|----------------------------------------------------------|----------------|------------------|
| <b>Gap</b> | <i>orthodenticle</i> | Scaffold177:468498-481641 + strand<br>GbueTmpM005873-RA  | 542            | zinc finger C2H2 |
|            | <i>buttonhead</i>    | Scaffold1076:201924-220125 + strand<br>GbueTmpM009254-RA | 437            | zinc finger M2C2 |

|                         |                         |                                                                                                    |      |                                |
|-------------------------|-------------------------|----------------------------------------------------------------------------------------------------|------|--------------------------------|
|                         | <i>collier</i>          | Scaffold128:650434 - 661155 + strand<br>GbueTmpM003852-RA<br>GbueTmpM003853-RA                     | 236  | IPT Superfamily                |
|                         | <i>cap-n-collar</i>     | Scaffold1737:125742 - 180215 + strand<br>GbueTmpA013482-RA                                         | 414  | bZIP Superfamily               |
|                         | <i>crocodile</i>        | Scaffold417:94048 -94890 – strand<br>GbueTmpA005876-RA                                             | 280  | Forkhead Superfamily           |
|                         | <i>Krüppel</i>          | Scaffold66:273659 - 274706 + strand<br>GbueTmpA001375-RA                                           | 246  | zinc finger M2C2               |
|                         | <i>huckebein</i>        | Scaffold1050:35145-36625 + strand<br>GbueTmpA011673-RA                                             | 153  | zinc finger C2H2               |
|                         | <i>empty spiracles</i>  | Scaffold640:42899 - 108829 + strand<br>GbueTmpA010166-RA<br>GbueTmpA010167-RA<br>GbueTmpA010168-RA | 237  | Homeobox Superfamily           |
|                         | <i>giant</i>            | Scaffold1313:205754 - 259477 – strand<br>GbueTmpM012482-RA                                         | 290  | bZIP Superfamily               |
|                         | <i>gomdangi</i>         | Scaffold177:546605-551844 + strand<br>GbueTmpM005874-RA                                            | 101  | ⊠meth_res Superfamily          |
| <b>Segment polarity</b> | <i>shifted</i>          | Scaffold4383:9065-11975 + strand                                                                   | 268  | WIF Superfamily                |
|                         | <i>roadkill</i>         | Scaffold7:1346380-1347546 + strand                                                                 | 388  | MATH superfamily<br>BTB Domain |
|                         | <i>perli-like</i>       | Scaffold542:114112-120587 – strand<br>GbueTmpM009219-RA                                            | 214  | Perli Domain                   |
|                         | <i>microtubule star</i> | Scaffold83:875664-876641 + strand                                                                  | 325  | MPP Superfamily                |
|                         | <i>flapwing</i>         | Scaffold362:255357-260899 - strand                                                                 | 240  | MPP Superfamily                |
|                         | <i>cullin1</i>          | Scaffold15:198529-200865 - strand                                                                  | 778  | Cullin Superfamily             |
|                         | <i>dispatched</i>       | Scaffold2487:39972-52586 - strand                                                                  | 434  | ND                             |
|                         | <i>costa</i>            | Scaffold666:175038-178490 + strand                                                                 | 1150 | Kinesin Domain                 |



|                            |                            |                                                         |      |                                         |
|----------------------------|----------------------------|---------------------------------------------------------|------|-----------------------------------------|
|                            | <i>paxillin</i>            | Scaffold927:228836-245479 - strand                      | 300  | LIM Superfamily                         |
| <b>Terminal patterning</b> | <i>Torso</i>               | Scaffold626:104429-114052 + strand<br>GbueTmpA010687-RA | 412  | PKc_like superfamily<br>FN3 superfamily |
|                            | <i>Torso-like</i>          | Scaffold7:1642089-1661652 + strand                      | 356  | MACPF Superfamily                       |
| <b>General</b>             | <i>decapentaplegic</i>     | Scaffold488:247243-262588 – strand<br>GbueTmpA009289-RA | 323  | TGF-Beta Domain                         |
|                            | <i>cubitus interruptus</i> | Scaffold2762:18072-42310 – strand<br>GbueTmpA017830-RA  | 960  | zinc finger-H                           |
|                            | <i>lipophorin-like</i>     | Scaffold940:71827-78984 + strand<br>GbueTmp8010317-RA   | 1202 | DUF1943 Superfamily                     |

Supplementary Table 10 : Current Early Developmental Genes identified in the *Gerris buenoi* genome. The table lists Gap Genes and Segment Polarity Genes models, model location and accession number, protein length, and protein domain identified in the model.

| <b><i>Gerris buenoi</i> early patterning genes</b> |     |
|----------------------------------------------------|-----|
| <b>Gap Genes</b>                                   |     |
| <i>caudal</i>                                      | ?   |
| <i>hunchback</i>                                   | Yes |
| <i>orthodenticle</i>                               | Yes |
| <i>buttonhead</i>                                  | Yes |
| <i>collier</i>                                     | Yes |
| <i>cap-n-collar</i>                                | Yes |
| <i>crocodile</i>                                   | Yes |
| <i>Krüppel</i>                                     | Yes |
| <i>huckebein</i>                                   | Yes |
| <i>sloppy-paired</i>                               | Yes |
| <i>empty spiracles</i>                             | Yes |
| <i>giant</i>                                       | Yes |
| <i>knirps</i>                                      | Yes |
| <i>tailless</i>                                    | Yes |
| <i>gomdanji</i>                                    | Yes |
| <b>Pair Rule Genes</b>                             |     |
| <i>even-skipped</i>                                | Yes |
| <i>paired</i>                                      | Yes |
| <i>odd-skipped</i>                                 | Yes |
| <i>paired</i>                                      | Yes |
| <i>runt</i>                                        | Yes |
| <i>hairy</i>                                       | Yes |
| <i>Tenascin major</i>                              | Yes |
| <i>sister-of-odd-and-bowl</i>                      | Yes |
| <b>Segment Polarity Genes</b>                      |     |
| <i>engrailed</i>                                   | Yes |
| <i>invected</i>                                    | Yes |
| <i>shifted</i>                                     | Yes |
| <i>roadkill</i>                                    | Yes |
| <i>peril-like</i>                                  | Yes |
| <i>patched</i>                                     | Yes |
| <i>nejire</i>                                      | Yes |
| <i>microtubule star</i>                            | Yes |
| <i>flapwing</i>                                    | Yes |
| <i>cullin1</i>                                     | Yes |
| <i>dispatched</i>                                  | Yes |
| <i>costa</i>                                       | Yes |
| <i>paxillin</i>                                    | Yes |
| <b>Terminal Patterning Genes</b>                   |     |
| <i>torso</i>                                       | Yes |
| <i>PTTH</i>                                        | ?   |
| <i>torso-like</i>                                  | Yes |
| <i>trunk</i>                                       | No  |

Supplementary Table 11 : Presence/absence of *Drosophila melanogaster* early patterning genes in the genomes of *Gerris buenoi*.

849

| Gene type                  | Gene name                  | <i>Drosophila melanogaster</i> |           | <i>Tribolium castaneum</i> |           |
|----------------------------|----------------------------|--------------------------------|-----------|----------------------------|-----------|
|                            |                            | QC (ID)                        | Bit Score | QC (ID)                    | Bit Score |
| <b>Gap</b>                 | <i>orthodenticle</i>       | 24% (98%)                      | 94        | 42% (71%)                  | 97        |
|                            | <i>buttonhead</i>          | 26% (61%)                      | 145       | 29% (70%)                  | 187       |
|                            | <i>collier</i>             | 43% (70%)                      | 94        | 47% (62%)                  | 90        |
|                            | <i>cap-n-collar</i>        | 19% (43%)                      | 47        | 56% (34%)                  | 116       |
|                            | <i>crocodile</i>           | 81% (52%)                      | 234       | 39% (65%)                  | 166       |
|                            | <i>Krüppel</i>             | 70% (71%)                      | 242       | 77% (59%)                  | 240       |
|                            | <i>huckebein</i>           | 71% (68%)                      | 174       | ND                         | ND        |
|                            | <i>empty spiracles</i>     | 86% (71%)                      | 179       | 90% (60%)                  | 281       |
|                            | <i>giant</i>               | 33% (62%)                      | 77        | 40% (48%)                  | 117       |
|                            | <i>gomdANJI</i>            | 64% (34%)                      | 45        | ND                         | ND        |
| <b>Segment polarity</b>    | <i>shifted</i>             | 95% (55%)                      | 286       | 92% (68%)                  | 350       |
|                            | <i>roadkill</i>            | 96% (56%)                      | 424       | 96% (57%)                  | 437       |
|                            | <i>peril-like</i>          | 77% (56%)                      | 194       | 96% (61%)                  | 262       |
|                            | <i>microtubule star</i>    | 84% (50%)                      | 295       | ND                         | ND        |
|                            | <i>flapwing</i>            | 87% (42%)                      | 184       | ND                         | ND        |
|                            | <i>cullin1</i>             | 99% (61%)                      | 956       | 100% (79%)                 | 1274      |
|                            | <i>dispatched</i>          | 98% (25%)                      | 181       | 96% (31%)                  | 181       |
|                            | <i>costa</i>               | 72% (36%)                      | 227       | 70% (27%)                  | 159       |
| <b>Terminal patterning</b> | <i>paxillin</i>            | 89% (65%)                      | 367       | 81% (66%)                  | 330       |
|                            | <i>Torso</i>               | 93% (53%)                      | 140       | 92% (31%)                  | 194       |
| <b>General</b>             | <i>Torso-like</i>          | 90% (46%)                      | 321       | 89% (49%)                  | 335       |
|                            | <i>decapentaplegic</i>     | 55% (34%)                      | 173       | 58% (39%)                  | 295       |
|                            | <i>cubitus interruptus</i> | 94% (46%)                      | 301       | 98% (42%)                  | 280       |
|                            | <i>lipophorin-like</i>     | 77% (23%)                      | 215       | 95% (33%)                  | 587       |

Supplementary Table 12 : Represents Query Coverage (Identity) and E-value of the annotated gene models pairwise aligned to orthologues in other species. Pairwise alignment was performed using NCBI blast. ND – Not Determined.

850

| Gene                                                     | Scaffold: start..end            | Locus length (nt)   | Protein length (aa) | Number of CDS exons |
|----------------------------------------------------------|---------------------------------|---------------------|---------------------|---------------------|
| <i>axin</i>                                              | Scaffold136:602832..659508      | 56 677              | 1496                | 16                  |
| <i>armadillo*</i>                                        | Scaffold2236:76533..96972       | 20 440<br>(partial) | 716<br>(partial)    | 11                  |
| <i>arrow</i>                                             | Scaffold136:139587..222403      | 82 817              | 1490                | 24                  |
| <i>dishevelled -RA</i>                                   | Scaffold441:78333..107479       | 29 147              | 602                 | 15                  |
| <i>dishevelled -RB</i>                                   | Scaffold441:78333..124793       | 46 461              | 597                 | 14                  |
| <i>frizzled</i>                                          | Scaffold288:270554..271759      | 1 206               | 401                 | 1                   |
| <i>frizzled-2</i>                                        | Scaffold1053:141773..14578<br>1 | 4 009               | 597                 | 1                   |
| <i>frizzled-3</i>                                        | Scaffold304:383672..482292      | 98 621              | 500                 | 2                   |
| <i>glycogen synthase kinase-3 beta -RA -part 1 of 2*</i> | Scaffold1391:148463..17482<br>2 | 26 360<br>(partial) | 302<br>(partial)    | 6                   |
| <i>glycogen synthase kinase-3 beta -RB -part 1 of 2*</i> | Scaffold1391:148463..17482<br>2 | 26 360<br>(partial) | 286<br>(partial)    | 6                   |
| <i>glycogen synthase kinase-3 beta -part 2 of 2*</i>     | Scaffold10229:2..3044           | 3 043<br>(partial)  | 150<br>(partial)    | 2                   |
| <i>wingless</i>                                          | Scaffold2771:12925..70979       | 58 055              | 331                 | 3                   |
| <i>Wnt7</i>                                              | Scaffold163:273675..338565      | 64 891              | 456                 | 10                  |
| <i>Wnt8</i>                                              | Scaffold1136:57077..65015       | 7 939               | 302                 | 5                   |
| <i>Wnt5</i>                                              | Scaffold3063:28070..66680       | 38 611              | 321                 | 6                   |
| <i>Wnt10</i>                                             | Scaffold2796:27374..49167       | 21 794              | 273                 | 5                   |

|                |                            |                    |                  |    |
|----------------|----------------------------|--------------------|------------------|----|
| <i>WntA*</i>   | Scaffold20: 632685..638039 | 5 355<br>(partial) | 287<br>(partial) | 5  |
| <i>wntless</i> | Scaffold190:240723..250315 | 9 593              | 538              | 11 |

Supplementary Table 13 : Positional information for the 18 Wnt signaling genes annotated. Incomplete gene models are marked with an asterisk (\*).

| <b>Gene set</b>    | <b>Gene name</b>                          | <b><i>Gerris buenoi</i><br/>CpG<sub>O/E</sub> value</b> | <b><i>Rhodnius proxilus</i><br/>CpG<sub>O/E</sub> value</b> |
|--------------------|-------------------------------------------|---------------------------------------------------------|-------------------------------------------------------------|
| Insulin signalling | <i>Chico</i>                              | 0.658374618                                             |                                                             |
| Insulin signalling | <i>forkhead box protein O</i>             |                                                         |                                                             |
| Insulin signalling | <i>Foxo</i>                               | 1.014152563                                             | 0.963514594                                                 |
| Insulin signalling | <i>Insulin receptor 1</i>                 | 1.090538511                                             | 1.133882478                                                 |
| Insulin signalling | <i>Insulin receptor 1-like</i>            | 0.865210624                                             |                                                             |
| Insulin signalling | <i>Insulin receptor 2</i>                 | 0.394382326                                             | 0.781348977                                                 |
| Insulin signalling | <i>Insulin receptor substrate</i>         |                                                         |                                                             |
| Insulin signalling | <i>Phosphatase and tensine homologue</i>  | 0.444946289                                             |                                                             |
| Insulin signalling | <i>Phosphoinositide 3-kinase Pi3K21B</i>  | 0.730078776                                             | 0.783423219                                                 |
| Insulin signalling | <i>Phosphoinositide 3-kinase Pi3K92E</i>  | 0.438681484                                             | 0.575389176                                                 |
| Insulin signalling | <i>Protein Kinase B</i>                   | 0.395861448                                             | 0.563182964                                                 |
| Insulin signalling | <i>Rheb/Ras homolog enriched in brain</i> | 0.540547798                                             |                                                             |
| Insulin signalling | <i>RPS6-p70-protein kinase</i>            | 0.731629717                                             | 0.704464786                                                 |
| Insulin signalling | <i>Slimfast</i>                           | 0.77679356                                              | 0.7171875                                                   |
| Insulin signalling | <i>Target of rapamycin</i>                | 0.648267284                                             | 0.641665967                                                 |
| Insulin signalling | <i>Thor</i>                               | 0.910084034                                             | 0.907818533                                                 |
| Insulin signalling | <i>Tsc1 Tuberous sclerosis complex 1</i>  | 0.383532463                                             | 0.517120208                                                 |
| Insulin signalling | <i>Tsc2/gigas/Tuberin</i>                 | 0.580956324                                             | 0.815878378                                                 |
| Juvenile Hormone   | <i>Allostatin C</i>                       |                                                         |                                                             |
| Juvenile Hormone   | <i>broad</i>                              | 0.905797101                                             | 0.973075749                                                 |
| Juvenile Hormone   | <i>Chd64</i>                              |                                                         |                                                             |
| Juvenile Hormone   | <i>FK506-binding protein 1</i>            | 0.480397835                                             | 0.498673415                                                 |

|                  |                                                |             |             |
|------------------|------------------------------------------------|-------------|-------------|
| Juvenile Hormone | <i>FK506-binding protein 14 ortholog</i>       |             |             |
| Juvenile Hormone | <i>FK506-binding protein FKBP59</i>            | 0.553441364 | 0.759341109 |
| Juvenile Hormone | <i>Juvenile hormone acid methyltransferase</i> | 0.853085106 | 0.627682228 |
| Juvenile Hormone | <i>Juvenile hormone epoxide hydrolase 1</i>    | 0.497504096 | 0.823006391 |
| Juvenile Hormone | <i>Juvenile hormone esterase</i>               |             |             |
| Juvenile Hormone | <i>Juvenile hormone esterase duplication</i>   |             |             |
| Juvenile Hormone | <i>Juvenile hormone-inducible protein 1</i>    | 0.437671182 | 0.579799692 |
| Juvenile Hormone | <i>Juvenile hormone-inducible protein 26</i>   | 0.90600823  | 0.302261307 |
| Juvenile Hormone | <i>Kruppel homolog 1</i>                       | 0.883615819 | 1.019771301 |
| Juvenile Hormone | <i>Methoprene-tolerant</i>                     | 0.633364098 | 0.59144385  |
| Juvenile Hormone | <i>taiman</i>                                  |             |             |
| Reproduction     | <i>Armitage</i>                                | 0.900408271 | 0.735040693 |
| Reproduction     | <i>Aubergine (annotated as Piwi-like)</i>      | 0.497755107 |             |
| Reproduction     | <i>Bazooka/PAR-3</i>                           |             | 0.68762606  |
| Reproduction     | <i>cappuccino</i>                              |             |             |
| Reproduction     | <i>capsuleen</i>                               |             |             |
| Reproduction     | <i>Dynein light chain 90F</i>                  | 1.006892418 | 0.784722222 |
| Reproduction     | <i>eIF5B</i>                                   | 0.66963049  | 0.699717583 |
| Reproduction     | <i>Heat shock protein 83/90</i>                | 0.661795474 | 0.78564613  |
| Reproduction     | <i>Heat shock protein 83/90 2</i>              |             | 0.558785904 |
| Reproduction     | <i>Hunchback</i>                               | 1.00601711  | 0.902307812 |
| Reproduction     | <i>Laminin A</i>                               |             |             |
| Reproduction     | <i>Laminin B2</i>                              |             |             |
| Reproduction     | <i>loki/Chk2</i>                               |             |             |
| Reproduction     | <i>maelstrom</i>                               |             |             |
| Reproduction     | <i>meiotic 41/ATR</i>                          | 0.318670549 |             |
| Reproduction     | <i>Merlin</i>                                  |             |             |
| Reproduction     | <i>Moesin</i>                                  |             |             |
| Reproduction     | <i>nanos</i>                                   | 0.392635135 |             |
| Reproduction     | <i>N-ethylmaleimide-sensitive factor 2</i>     |             |             |
| Reproduction     | <i>Par - 6</i>                                 | 0.493019601 | 0.75739645  |
| Reproduction     | <i>Par-1</i>                                   |             |             |
| Reproduction     | <i>pebble/ECT2</i>                             | 0.346433041 | 0.556323529 |

|              |                                                  |             |             |
|--------------|--------------------------------------------------|-------------|-------------|
| Reproduction | <i>Piwi (annotated as piwi-like)</i>             |             |             |
| Reproduction | <i>Rab11</i>                                     | 1.21100186  | 0.891789661 |
| Reproduction | <i>sevenless</i>                                 |             |             |
| Reproduction | <i>Smaug</i>                                     |             | 0.374331551 |
| Reproduction | <i>Spindle-D</i>                                 |             |             |
| Reproduction | <i>Spindle-E</i>                                 |             |             |
| Reproduction | <i>staufen</i>                                   | 0.335958039 | 0.63898769  |
| Reproduction | <i>Stellate</i>                                  |             |             |
| Reproduction | <i>telomere fusion</i>                           |             |             |
| Reproduction | <i>tudor</i>                                     | 1.249130153 | 0.799734986 |
| Reproduction | <i>vasa</i>                                      | 0.693071093 |             |
| Wing         | <i>Acetylcholine esterase</i>                    | 1.056863669 | 0.931578947 |
| Wing         | <i>apterous</i>                                  |             |             |
| Wing         | <i>argos</i>                                     |             |             |
| Wing         | <i>armadillo</i>                                 | 0.404645677 | 0.517999969 |
| Wing         | <i>baboon</i>                                    | 0.516144578 | 0.667751211 |
| Wing         | <i>basket</i>                                    | 0.740959251 | 0.7426405   |
| Wing         | <i>bifid</i>                                     |             |             |
| Wing         | <i>blistered</i>                                 |             |             |
| Wing         | <i>brinker</i>                                   | 0.876838162 | 0.574162679 |
| Wing         | <i>Buffy</i>                                     | 0.602699055 |             |
| Wing         | <i>capricious</i>                                | 0.914409241 | 0.819466248 |
| Wing         | <i>clot</i>                                      | 0.872160934 | 1.03902439  |
| Wing         | <i>cut</i>                                       | 0.362195409 | 0.754880803 |
| Wing         | <i>Death regulator Nedd2-like caspase</i>        | 1.146718147 |             |
| Wing         | <i>Death related ICE-like caspase</i>            | 0.6890625   | 0.804121212 |
| Wing         | <i>Death-associated inhibitor of apoptosis 1</i> |             |             |
| Wing         | <i>Decapping protein 1</i>                       | 1.189357953 | 0.711444547 |
| Wing         | <i>division abnormally delayed</i>               | 0.535155846 | 0.513011152 |
| Wing         | <i>eiger</i>                                     | 0.838224085 | 0.839430894 |
| Wing         | <i>engrailed</i>                                 | 1.247013856 | 0.814175728 |
| Wing         | <i>Epidermal growth factor receptor</i>          | 0.697416093 | 0.659715546 |
| Wing         | <i>fringe</i>                                    | 1.294816794 | 0.638368984 |
| Wing         | <i>hedgehog</i>                                  | 0.964415584 | 0.773176471 |
| Wing         | <i>Keren</i>                                     | 0.754096776 |             |
| Wing         | <i>Mad1</i>                                      | 0.517751479 |             |
| Wing         | <i>Mad2</i>                                      | 0.414863782 | 0.499577603 |
| Wing         | <i>Mad3</i>                                      | 0.440286166 | 0.555261005 |
| Wing         | <i>mastermind</i>                                | 0.516834008 | 0.690080382 |
| Wing         | <i>Medea</i>                                     | 0.497130418 | 0.534404253 |
| Wing         | <i>mind bomb 1</i>                               | 0.533591731 | 0.771083019 |
| Wing         | <i>nemo</i>                                      | 1.09630137  | 0.58400637  |



|      |                               |             |             |
|------|-------------------------------|-------------|-------------|
| Wing | <i>Nipped-A</i>               |             |             |
| Wing | <i>patched</i>                | 0.475015567 | 0.732220161 |
| Wing | <i>punt</i>                   | 0.990559836 | 0.428825279 |
| Wing | <i>punt 2</i>                 | 0.451908397 |             |
| Wing | <i>Ras oncogene at 85D</i>    | 1.040664452 | 0.743847875 |
| Wing | <i>saxophone</i>              | 0.949921557 |             |
| Wing | <i>schnurri</i>               | 0.347452969 |             |
| Wing | <i>Serrate</i>                |             |             |
| Wing | <i>smoothened</i>             | 0.431910569 |             |
| Wing | <i>spalt major</i>            | 0.925619236 | 0.699655862 |
| Wing | <i>Star</i>                   | 0.658335154 |             |
| Wing | <i>Suppressor of Hairless</i> | 0.542231327 | 0.624452765 |
| Wing | <i>tartan</i>                 | 0.732986444 | 1.144366197 |
| Wing | <i>thickveins</i>             | 0.586962236 |             |
| Wing | <i>wingless</i>               | 1.124115983 | 1.017095821 |

Supplementary Table 14 : List of genes in the networks underlying wing polyphenism, reproduction, juvenile hormone, and insulin signalling included in the analysis and their CpG<sub>O/E</sub> value for *Gerris buenoi* and *Rhodnius prolixus*. Genes that were annotated in *Gerris buenoi* but excluded from the analysis because they did not have a complete coding sequence are also listed but without a CpG<sub>O/E</sub> value.

|                             | Core histones |           |          |           |          |
|-----------------------------|---------------|-----------|----------|-----------|----------|
|                             | H1            | H2A       | H2B      | H3        | H4       |
| <i>Aedes aegypti</i>        | 6             | 19        | 11       | 18        | 15       |
| <i>Apis mellifera</i>       | 2             | 6         | 5        | 6         | 4        |
| <i>Acyrtosiphon pisum</i>   | 6             | 5         | 5        | 7         | 5        |
| <i>Oncopeltus fasciatus</i> | 1             | 3         | 4        | 3         | 2        |
| <i>Cimex lectularius</i>    | 4             | 14        | 6        | 13        | 8        |
| <b><i>Gerris buenoi</i></b> | <b>10</b>     | <b>11</b> | <b>9</b> | <b>10</b> | <b>9</b> |
| <i>Daphnia pulex</i>        | 5             | 10        | 12       | 10        | 6        |
| <i>Tetranychus urticae</i>  | 1             | 4         | 7        | 6         | 3        |
| <i>Ixodes scapularis</i>    | 4             | 6         | 4        | 4         | 1        |
| <i>Strigamia maritima</i>   | 3             | 7         | 15       | 4         | 4        |

Supplementary Table 15 : Number of loci within the genomes of arthropod species encoding the five classes of histones. Orthologs for *Aedes aegypti*, *Daphnia pulex*, *Tetranychus urticae* and *Ixodes scapularis* were obtained by BLAST analysis. Orthologs for *Apis mellifera* and *Acyrtosiphon pisum* were obtained from published literature [136, 166]. Orthologs for *Oncopeltus fasciatus* (manuscript in preparation) and *Cimex lectularius* [81] were obtained during genome annotation.

851

| Species                        | Number of antioxidant genes |
|--------------------------------|-----------------------------|
| <i>Acyrtosiphon pisum</i>      | 6                           |
| <i>Apis mellifera</i>          | 1                           |
| <i>Bombyx mori</i>             | 2                           |
| <i>Cimex lectularis</i>        | 16                          |
| <i>Drosophila melanogaster</i> | 0                           |
| <i>Pediculus humanus</i>       | 0                           |
| <i>Tribolium castaneum</i>     | 5                           |

Supplementary Table 16 : Number of genes for each species compared to that had highest similarity to *G. Buenoi* antioxidant genes.

852

|                                                 |                                                |                                                                                                                                              |
|-------------------------------------------------|------------------------------------------------|----------------------------------------------------------------------------------------------------------------------------------------------|
| <b>Bio Projects</b>                             | i5K Pilot NCBI Bio-project                     | PRJNA163973<br><a href="https://www.ncbi.nlm.nih.gov/bioproject/163973">https://www.ncbi.nlm.nih.gov/bioproject/163973</a>                   |
|                                                 | <i>Gerris buenoi</i> NCBI Bio-project          | PRJNA203045<br><a href="https://www.ncbi.nlm.nih.gov/bioproject/203045">https://www.ncbi.nlm.nih.gov/bioproject/203045</a>                   |
|                                                 | NCBI Bio-sample                                | SAMN02800617<br><a href="https://www.ncbi.nlm.nih.gov/biosample/2800617">https://www.ncbi.nlm.nih.gov/biosample/2800617</a>                  |
| <b>Genome Sequence</b>                          | 180bp insert <i>male</i> DNA                   | 1 Illumina HiSeq 2000 run: 122.1M read pairs, 24.7Gbp                                                                                        |
|                                                 | 500bp insert <i>male</i> DNA                   | 1 Illumina HiSeq 2500 run: 36.4M read pairs, 7.4Gbp                                                                                          |
|                                                 | 3kb insert <i>male</i> DNA                     | 1 Illumina HiSeq 2000 run: 137.4M read pairs, 27.8 Gbp                                                                                       |
|                                                 | 8kb insert <i>female</i> DNA                   | 1 Illumina HiSeq 2000 run: 135.9M read pairs, 27.4 Gbp                                                                                       |
|                                                 | 180bp insert NCBI SRA Accession                | SRX493944<br><a href="https://www.ncbi.nlm.nih.gov/sra/SRX493944">https://www.ncbi.nlm.nih.gov/sra/SRX493944</a>                             |
|                                                 | 500bp insert NCBI SRA Accession                | SRX493946<br><a href="https://www.ncbi.nlm.nih.gov/sra/SRX493946">https://www.ncbi.nlm.nih.gov/sra/SRX493946</a>                             |
|                                                 | 3kb insert NCBI SRA Accession                  | SRX493945<br><a href="https://www.ncbi.nlm.nih.gov/sra/SRX493945">https://www.ncbi.nlm.nih.gov/sra/SRX493945</a>                             |
|                                                 | 8kb insert NCBI SRA Accession                  | SRX493943<br><a href="https://www.ncbi.nlm.nih.gov/sra/SRX493943">https://www.ncbi.nlm.nih.gov/sra/SRX493943</a>                             |
| <b>Genome Assembly</b>                          | Number of contigs                              | 304,893                                                                                                                                      |
|                                                 | Contig N50                                     | 3,812 bp                                                                                                                                     |
|                                                 | Number of scaffolds                            | 20,259                                                                                                                                       |
|                                                 | Scaffold N50                                   | 344,118 bp                                                                                                                                   |
|                                                 | Size of final assembly                         | 1,000,161,732 bp                                                                                                                             |
|                                                 | Size of final assembly - without gaps          | 653,297,297 bp                                                                                                                               |
|                                                 | NCBI Genome Assembly Accession                 | GCA_001010745.1<br><a href="https://www.ncbi.nlm.nih.gov/assembly/GCA_001010745.1">https://www.ncbi.nlm.nih.gov/assembly/GCA_001010745.1</a> |
| <b>RNAseq data</b>                              | <i>Gerris buenoi</i> Transcriptome Bio-project | PRJNA275657<br><a href="https://www.ncbi.nlm.nih.gov/bioproject/275657">https://www.ncbi.nlm.nih.gov/bioproject/275657</a>                   |
|                                                 | Mixed sex embryos and nymphs RNAseq reads      | 32M read pairs, 6.5 Gbp                                                                                                                      |
|                                                 | Mixed sex embryos and nymphs SRA Accession     | SRX896710<br><a href="https://www.ncbi.nlm.nih.gov/sra/SRX896710">https://www.ncbi.nlm.nih.gov/sra/SRX896710</a>                             |
| <b>Automated Genome Annotation (Gbue_0.5.3)</b> | Genes (Gbue_0.5.3)                             | 20 949                                                                                                                                       |
|                                                 | Average Transcript length                      | 1 298                                                                                                                                        |
|                                                 | Average CDS length                             | 954 bp (318 aa)                                                                                                                              |
|                                                 | Exons per gene                                 | 4.81                                                                                                                                         |
|                                                 | Genome Annotation Link                         | National Agricultural Library<br><a href="https://i5k.nal.usda.gov/Gerris_buenoi">https://i5k.nal.usda.gov/Gerris_buenoi</a>                 |

Supplementary Table 17 : Sequencing, assembly, annotation statistics and accession numbers

853

854 **Supplementary Sequences**

855 Antioxidants excel table

856

857 155 GbueOr protein sequences

858 135 GbueGr protein sequences

859 45 GbueIR protein sequences

860

861

862 **Serosins nucleotide sequences**

&gt;Serosin\_1 (Scaffold3130)

ATGGCTCGCTACACTCTTCTGTGTGTTATTGCTTCATGCCTGGTTGCCCTTGCTGTTTTCGGTGCCTTTTGAGCAGAAAAC  
 AGCTTTCGAGTTAAAGGAACGTCACGACTTCTACAACCCTAGGAGCGACAACCCGTTTCAGCACGTCTGGATCGGATGCAC  
 ACATGAAGACACAAAGCGCTAGAGTAGAGCATGACTTCATCGGAGGCAAGAAGCTGGGCTGCTGGTGGTTACGCTCAACAT  
 GAAAGACAGAGCATGTTTCGGACAGACCCGTCGTAACAACGAAGGTGGATTCCAATTTAAAGCGAGATTTTAG

&gt;Serosin\_2 (Scaffold2193)

ATGGCCCGCTACACTCTCCTCTGTGTTATCGCTTCATGCCTGGTTGCTCTTGCTGTTTTCGGTGCCGTTTCGAACAGAAAAC  
 AGCTTTCGAGTTAAAGGAACGTCACGACTTCTACAACCCTAGGAGCGACAACCCGTTTCAGCACGTCTGGATCGGATGCAC  
 ACATGAAGACACAAAGCGCTAGAGTAGAGCAGACTTTATCGGAGGCAAAAAGCTGGGCTGCTGGTGGTTACGCTCAACAT  
 GAAAGACAGAGCATGTTTCGGACAGACCCGTCGTAACAACGAAGGTGGATTCCAATTTAAAGCAAGATTTTAG

&gt;Serosin\_3 (Scaffold3130)

ATGGCCCGTTACACTCTCCTCTGTGTTATTGCTTCCTGCCTGGTGGCTCTTGCTGTTTTCGGTGCCGTTTCGAGCAGAAAAC  
 AGCTTTCGAGTTGAAGGAACGTCACGACTTCTACAACCCTAGGAGCGACAACCCGTTTCAGCACGTCTGGATCGGATGCAC  
 ACATGAAGACACAAAGCGCTAGAGTAGAGCATGACTTCATCGGAGGCAAGAAGCTGGGCTGCTGGTGGTTACGCTCAACAT  
 GAAAGACAGAGCATGTTTCGGACAGACCCGTCGTAACAACGAAGGTGGATTCCAATTTAAAGCGAGATTTTAG

&gt;Serosin\_4 (Scaffold2193)

ATGGCTCGCTACACTCTCCTTTGTGTTATCGCTTCCTGCCTGGTTGCTCTTGCTGTTTTCGGTGCCGTTTCGAACAGAAAAC  
 AGCTTTCGAGTTGAAGGAACGTCACGACTTCTACAACCCTAGGAGCGACAACCCGTTTCAGCACGTCTGGATCGGATGCAC  
 ACATGAAGACTCAAAGCGCTAGAATAGAGCATGACTTTATCGGAGGCAAGAAGCTGGGCTGCTGGTGGTTACGCTCAACAT  
 GAAAGACAGAGCATGTTTCGGACAGACCCGACGAAACAACGAAGGTGGATTCCAATTTAAAGCAAGATTTTAG

&gt;Serosin\_5 (Scaffold3130)

ATGGCTCGCTACACTCTCCTCTGTGTTATCGCTTCCTGCCTGGTGGCTCTTGCTGTTTTCGGTGCCGTTTCGAACAGAAAAC  
 ATCTTTCGACTATAAGGAACGTCACGACTTCCAGGACAACCCGCTCTGGATCGGATGCCACATGAAGACCCAAAGAGCTA  
 GAGTAGAACATGACTTTTGTGGAGGCAAGAAGCTGGGCTGCTGGTGGTTACGTTCAACACGAAAGACAGACTATGTACGGA  
 GAGACACGTAAGCAAACGAAGGAGGAGTCCAAGTTAAAGTAACATTTTAG

&gt;Serosin\_6 (Scaffold3130)

ATGGTCCGCCACGCTTTGTTTTGTGTTATCGCTTTCTGCCTGGTTACTCTCGCTGTTTTCGGTGCCATTTGAGCAGAAAAC  
 AGCTTTTGACTACAAGGAACGTCACGACTTCTATAATCCTAAGAACGACAACCCGTTTCAGTACGTCTGGATCGGATGCAC  
 ACATGAAGACACAAAGCGCTAGAGTAGAGCATGACTTTGCCGAGGCAAGAATTGGGCTGCTGGTTTTTTACGCTCAACAT  
 GAAAGACAGAATATGAACGGACAGTCCCCTCGTAACAACGAAGCTGGATTCCAATTTAAAGGAACATTTTAG

863 **Serosins protein sequences**

&gt;Serosin\_1 (Scaffold3130)

MARYTLLCVIASCLVALAVSVPFEQKTAFELKERHDFYNPRSDNPFSTSGSDAHMKTQSARVEHDFIGGKNWAAGGYAQH  
 ERQSMFGQTRRNNEGGFQFKARF

&gt;Serosin\_2 (Scaffold2193)

MARYTLLCVIASCLVALAVSVPFEQKTAFELKERHDFYNPRSDNPFSTSGSDAHMKTQSARVEHDFIGGKNWAAGGYAQH  
 ERQSMFGQTRRNNEGGFQFKARF

&gt;Serosin\_3 (Scaffold3130)

MARYTLLCVIASCLVALAVSVPFEQKTAFELKERHDFYNPRSDNPFSTSGSDAHMKTQSARVEHDFIGGKNWAAGGYAQH  
 ERQSMFGQTRRNNEGGFQFKARF

&gt;Serosin\_4 (Scaffold2193)

MARYTLLCVIASCLVALAVSVPFEQKTAFELKERHDFYNPRSDNPFSTSGSDAHMKTQSARIEHDFIGGKNWAAGGYAQH  
 ERQSMFGQTRRNNEGGFQFKARF

&gt;Serosin\_5 (Scaffold3130)

MARYTLLCVIASCLVALAVSVPFEQKTSFDYKERHDFQDNPSGSDAHMKTQRARVEHDFVGGKNWAAGGYVQHERQTMYG  
 ETRKQNEGGVQVKVTF

>Serosin\_6 (Scaffold3130)

MVRHALFCVIAFCLVTLAVSVPFEQKTAFDYKERHDFYNPKNDNPFSTSGSDAHMKTQSARVEHDFAGGKNWAAGFYAQH  
ERQNMNGQSRRNNEAGFQFKGTF

864

865

866 **References**

867

868

- 869 1. Kongton, K., K. McCall, and A. Phongdara, *Identification of gamma-interferon-inducible lysosomal thiol reductase (GILT) homologues in the fruit fly Drosophila melanogaster*. *Dev Comp Immunol*, 2014. **44**(2): p. 389-96.
- 870 2. De Gregorio, E., et al., *The Toll and Imd pathways are the major regulators of the immune response in Drosophila*. *EMBO J*, 2002. **21**(11): p. 2568-79.
- 871 3. Zou, Z., et al., *Comparative genomic analysis of the Tribolium immune system*. *Genome Biol*, 2007. **8**(8): p. R177.
- 872 4. Chipman, A.D., et al., *The first myriapod genome sequence reveals conservative arthropod gene content and genome organisation in the centipede Strigamia maritima*. *PLoS Biol*, 2014. **12**(11): p. e1002005.
- 873 5. Hoffmann, J.A. and J.M. Reichhart, *Drosophila innate immunity: an evolutionary perspective*. *Nat Immunol*, 2002. **3**(2): p. 121-6.
- 874 6. Tzou, P., E. De Gregorio, and B. Lemaitre, *How Drosophila combats microbial infection: a model to study innate immunity and host-pathogen interactions*. *Curr Opin Microbiol*, 2002. **5**(1): p. 102-10.
- 875 7. Consortium, T.I.A.G., *Genome sequence of the pea aphid Acyrthosiphon pisum*. *PLoS Biol*, 2010. **8**(2): p. e1000313.
- 876 8. Gerardo, N.M., et al., *Immunity and other defenses in pea aphids, Acyrthosiphon pisum*. *Genome Biol*, 2010. **11**(2): p. R21.
- 877 9. Panfilio, K.A., et al., *Molecular evolutionary trends and feeding ecology diversification in the Hemiptera, anchored by the milkweed bug genome*. *bioRxiv*, 2017.
- 878 10. Jenssen, H., P. Hamill, and R.E. Hancock, *Peptide antimicrobial agents*. *Clin Microbiol Rev*, 2006. **19**(3): p. 491-511.
- 879 11. Vilcinskis, A., *Evolutionary plasticity of insect immunity*. *J Insect Physiol*, 2013. **59**(2): p. 123-9.
- 880 12. Jacobs, C.G.C., et al., *Immune function of the serosa in a hemimetabolous insect egg*, in *BMC Evolutionary Biology (Submitted)*. 2017.
- 881 13. Armisen, D., et al., *Predator strike shapes antipredator phenotype through new genetic interactions in water striders*. *Nat Commun*, 2015. **6**: p. 8153.
- 882 14. Khila, A., E. Abouheif, and L. Rowe, *Evolution of a novel appendage ground plan in water striders is driven by changes in the Hox gene Ultrabithorax*. *PLoS Genet*, 2009. **5**(7): p. e1000583.
- 883 15. Kalinka, A.T., et al., *Gene expression divergence recapitulates the developmental hourglass model*. *Nature*, 2010. **468**(7325): p. 811-4.
- 884 16. Refki, P.N. and A. Khila, *Key patterning genes contribute to leg elongation in water striders*. *Evodevo*, 2015. **6**: p. 14.
- 885 17. Kirkness, E.F., et al., *Genome sequences of the human body louse and its primary endosymbiont provide insights into the permanent parasitic lifestyle*. *Proc Natl Acad Sci U S A*, 2010. **107**(27): p. 12168-73.
- 886 18. Christiaens, O., et al., *Halloween genes and nuclear receptors in ecdysteroid biosynthesis and signalling in the pea aphid*. *Insect Mol Biol*, 2010. **19 Suppl 2**: p. 187-200.
- 887 19. Shigenobu, S., et al., *Comprehensive survey of developmental genes in the pea aphid, Acyrthosiphon pisum: frequent lineage-specific duplications and losses of developmental genes*. *Insect Mol Biol*, 2010. **19 Suppl 2**: p. 47-62.
- 888 20. Naggan Perl, T., et al., *The evolution of the knirps family of transcription factors in arthropods*. *Mol Biol Evol*, 2013. **30**(6): p. 1348-57.
- 889 21. Watanabe, T., H. Takeuchi, and T. Kubo, *Structural diversity and evolution of the N-terminal isoform-specific region of ecdysone receptor-A and -B1 isoforms in insects*. *BMC Evol Biol*, 2010. **10**: p. 40.
- 890 22. Dang, C.W., et al., *The basic helix-loop-helix transcription factor family in the pea aphid, Acyrthosiphon pisum*. *J Insect Sci*, 2011. **11**: p. 84.
- 891 23. Bitra, K., et al., *Functional characterization of PAS and HES family bHLH transcription factors during the metamorphosis of the red flour beetle, Tribolium castaneum*. *Gene*, 2009. **448**(1): p. 74-87.
- 892 24. Baker, K.D. and C.S. Thummel, *Diabetic larvae and obese flies-emerging studies of metabolism in Drosophila*. *Cell Metab*, 2007. **6**(4): p. 257-66.
- 893 25. Edgar, B.A., *How flies get their size: genetics meets physiology*. *Nat Rev Genet*, 2006. **7**(12): p. 907-16.
- 894 26. Martin, D.E. and M.N. Hall, *The expanding TOR signaling network*. *Curr Opin Cell Biol*, 2005. **17**(2): p. 158-66.
- 895 27. Junger, M.A., et al., *The Drosophila forkhead transcription factor FOXO mediates the reduction in cell number associated with reduced insulin signaling*. *J Biol*, 2003. **2**(3): p. 20.
- 896 28. Puig, O. and R. Tjian, *Transcriptional feedback control of insulin receptor by dFOXO/FOXO1*. *Genes Dev*, 2005. **19**(20): p. 2435-46.

- 925 29. Kapahi, P., et al., *Regulation of lifespan in Drosophila by modulation of genes in the TOR signaling pathway*. *Curr Biol*, 2004. **14**(10): p. 885-90.
- 926
- 927 30. Wang, M.C., D. Bohmann, and H. Jasper, *JNK extends life span and limits growth by antagonizing cellular and organism-wide responses to insulin signaling*. *Cell*, 2005. **121**(1): p. 115-25.
- 928
- 929 31. Wullschleger, S., R. Loewith, and M.N. Hall, *TOR signaling in growth and metabolism*. *Cell*, 2006. **124**(3): p. 471-84.
- 930
- 931 32. Emlen, D.J., et al., *Insulin signaling and limb-patterning: candidate pathways for the origin and evolutionary diversification of beetle 'horns'*. *Heredity (Edinb)*, 2006. **97**(3): p. 179-91.
- 932
- 933 33. Hattori, A., et al., *Soldier morphogenesis in the damp-wood termite is regulated by the insulin signaling pathway*. *J Exp Zool B Mol Dev Evol*, 2013. **320**(5): p. 295-306.
- 934
- 935 34. Patel, A., et al., *The making of a queen: TOR pathway is a key player in diphenic caste development*. *PLoS One*, 2007. **2**(6): p. e509.
- 936
- 937 35. Emlen, D.J., et al., *A mechanism of extreme growth and reliable signaling in sexually selected ornaments and weapons*. *Science*, 2012. **337**(6096): p. 860-4.
- 938
- 939 36. Snell-Rood, E.C. and A.P. Moczek, *Insulin signaling as a mechanism underlying developmental plasticity: the role of FOXO in a nutritional polyphenism*. *PLoS One*, 2012. **7**(4): p. e34857.
- 940
- 941 37. Murat, S., C. Hopfen, and A.P. McGregor, *The function and evolution of Wnt genes in arthropods*. *Arthropod Struct Dev*, 2010. **39**(6): p. 446-52.
- 942
- 943 38. Oberhofer, G., et al., *Wnt/beta-catenin signaling integrates patterning and metabolism of the insect growth zone*. *Development*, 2014. **141**(24): p. 4740-50.
- 944
- 945 39. Janssen, R., et al., *Conservation, loss, and redeployment of Wnt ligands in protostomes: implications for understanding the evolution of segment formation*. *BMC Evol Biol*, 2010. **10**: p. 374.
- 946
- 947 40. Beermann, A., et al., *A context-dependent combination of Wnt receptors controls axis elongation and leg development in a short germ insect*. *Development*, 2011. **138**(13): p. 2793-805.
- 948
- 949 41. Rawlings, N.D., A.J. Barrett, and R. Finn, *Twenty years of the MEROPS database of proteolytic enzymes, their substrates and inhibitors*. *Nucleic Acids Res*, 2016. **44**(D1): p. D343-50.
- 950
- 951 42. Turk, V., et al., *Cysteine cathepsins: from structure, function and regulation to new frontiers*. *Biochim Biophys Acta*, 2012. **1824**(1): p. 68-88.
- 952
- 953 43. Terra, W.R. and C. Ferreira, *Insect digestive enzymes: properties, compartmentalization and function*. *Comparative Biochemistry and Physiology Part B: Comparative Biochemistry*, 1994. **109**(1): p. 1-62.
- 954
- 955 44. Terra, W.R. and C. Ferreira, *11 - Biochemistry and Molecular Biology of Digestion A2 - Gilbert, Lawrence I, in Insect Molecular Biology and Biochemistry*. 2012, Academic Press: San Diego. p. 365-418.
- 956
- 957 45. Murdock, L.L., et al., *Cysteine digestive proteinases in Coleoptera*. *Comparative Biochemistry and Physiology Part B: Comparative Biochemistry*, 1987. **87**(4): p. 783-787.
- 958
- 959 46. Houseman, J.G. and A.E.R. Downe, *Cathepsin D-like activity in the posterior midgut of hemipteran insects*. *Comparative Biochemistry and Physiology Part B: Comparative Biochemistry*, 1983. **75**(3): p. 509-512.
- 960
- 961 47. Martynov, A.G., et al., *Functional analysis of C1 family cysteine peptidases in the larval gut of capital Tenebrio molitor and Tribolium castaneum*. *BMC Genomics*, 2015. **16**: p. 75.
- 962
- 963 48. Perkin, L., E.N. Elpidina, and B. Oppert, *Expression patterns of cysteine peptidase genes across the Tribolium castaneum life cycle provide clues to biological function*. *PeerJ*, 2016. **4**: p. e1581.
- 964
- 965 49. Oppert, B., et al., *Microarray analysis reveals strategies of Tribolium castaneum larvae to compensate for cysteine and serine protease inhibitors*. *Comp Biochem Physiol Part D Genomics Proteomics*, 2010. **5**(4): p. 280-7.
- 966
- 967
- 968 50. Kollien, A.H., et al., *Activity and sequence characterization of two cysteine proteases in the digestive tract of the reduviid bug Triatoma infestans*. *Insect Mol Biol*, 2004. **13**(6): p. 569-79.
- 969
- 970 51. Waniek, P.J., et al., *Cathepsin L of Triatoma brasiliensis (Reduviidae, Triatominae): sequence characterization, expression pattern and zymography*. *J Insect Physiol*, 2012. **58**(1): p. 178-87.
- 971
- 972 52. Ribeiro, J.M., et al., *An insight into the transcriptome of the digestive tract of the bloodsucking bug, Rhodnius prolixus*. *PLoS Negl Trop Dis*, 2014. **8**(1): p. e2594.
- 973
- 974 53. Novinec, M. and B. Lenarcic, *Papain-like peptidases: structure, function, and evolution*. *Biomol Concepts*, 2013. **4**(3): p. 287-308.
- 975
- 976 54. Sakurai, M., et al., *Distribution of tubulointerstitial nephritis antigen-like 1 and structural matrix proteins in mouse embryos during preimplantation development in vivo and in vitro*. *Zygote*, 2014. **22**(2): p. 259-65.
- 977
- 978 55. Saito, H., S. Kurata, and S. Natori, *Purification and characterization of a hemocyte proteinase of Sarcophaga, possibly participating in elimination of foreign substances*. *Eur J Biochem*, 1992. **209**(3): p. 939-44.
- 979
- 980 56. Gruden, K., et al., *Diverse enzymatic specificities of digestive proteases, 'intestains', enable Colorado potato beetle larvae to counteract the potato defence mechanism*. *Biol Chem*, 2003. **384**(2): p. 305-10.
- 981
- 982 57. Meyer, H.W., *Visuelle Schlüsselreize für die Auslösung der Beutefanghandlung beim Bachwasserläufer Velia caprai (Hemiptera, Heteroptera)*. *Zeitschrift für vergleichende Physiologie*, 1971. **72**(3): p. 260-297.
- 983
- 984 58. Rowe, L., *The costs of mating and mate choice in water striders*. *Animal Behaviour*, 1994. **48**: p. 1049-56.

- 985 59. Spence, J.R. and N. Anderson, *Biology of water striders: interactions between systematics and ecology*. Annual Review of Entomology, 1994. **39**(1): p. 101-128.
- 986
- 987 60. Dahmen, H., *Eye specialisation in waterstriders: an adaptation to life in a flat world*. Journal of Comparative  
988 Physiology A, 1991. **169**(5): p. 623-632.
- 989 61. Wolburg-Buchholz, K., *The organization of the lamina ganglionaris of the hemipteran insects, Notonecta  
990 glauca, Corixa punctata and Gerris lacustris*. Cell Tissue Res, 1979. **197**(1): p. 39-59.
- 991 62. Schneider, L. and H. Langer, *Die Struktur des Rhabdoms im „Doppelauge“ des Wasserläufers Gerris  
992 lacustris*. 1969: Zeitschrift für Zellforschung und Mikroskopische Anatomie.
- 993 63. Fischer, C., M. Mahner, and E. Wachmann, *The rhabdom structure in the ommatidia of the Heteroptera  
994 (Insecta), and its phylogenetic significance*. Zoomorphology, 2000. **120**(1): p. 1-13.
- 995 64. Schwind, R., *Polarization vision in water insects and insects living on a moist substrate*. Journal of  
996 Comparative Physiology A, 1991. **169**(5): p. 531-540.
- 997 65. Bohn, H. and U. Täuber, *Beziehungen zwischen der Wirkung polarisierten Lichtes auf das Elektroretinogramm  
998 und der Ultrastruktur des Auges von Gerris lacustris L.* Zeitschrift für vergleichende Physiologie, 1971. **72**(1):  
999 p. 32-53.
- 1000 66. Frolov, R. and M. Weckström, *Developmental changes in biophysical properties of photoreceptors in the  
1001 common water strider (Gerris lacustris): better performance at higher cost*. Journal of neurophysiology, 2014.  
1002 **112**(4): p. 913-922.
- 1003 67. Bartsch, K., *Polarization-sensitive photoreceptors of different spectral types in the compound eye of  
1004 waterstriders*. Naturwissenschaften, 1995. **82**(6): p. 292-293.
- 1005 68. Henze, M.J. and T.H. Oakley, *The Dynamic Evolutionary History of Pancrustacean Eyes and Opsins*. Integr  
1006 Comp Biol, 2015. **55**(5): p. 830-42.
- 1007 69. Frentiu, F.D., et al., *Adaptive evolution of color vision as seen through the eyes of butterflies*. Proc Natl Acad  
1008 Sci U S A, 2007. **104 Suppl 1**: p. 8634-40.
- 1009 70. Frentiu, F.D., et al., *Gene duplication is an evolutionary mechanism for expanding spectral diversity in the  
1010 long-wavelength photopigments of butterflies*. Mol Biol Evol, 2007. **24**(9): p. 2016-28.
- 1011 71. Sharkey, C.R., et al., *Overcoming the loss of blue sensitivity through opsin duplication in the largest animal  
1012 group, beetles*. Sci Rep, 2017. **7**(1): p. 8.
- 1013 72. Briscoe, A.D. and L. Chittka, *The evolution of color vision in insects*. Annu Rev Entomol, 2001. **46**: p. 471-  
1014 510.
- 1015 73. Brody, T. and A. Cravchik, *Drosophila melanogaster G protein-coupled receptors*. J Cell Biol, 2000. **150**(2):  
1016 p. F83-8.
- 1017 74. Senthilan, P.R. and C. Helfrich-Forster, *Rhodopsin 7-The unusual Rhodopsin in Drosophila*. PeerJ, 2016. **4**: p.  
1018 e2427.
- 1019 75. Colbourne, J.K., et al., *The ecoresponsive genome of Daphnia pulex*. Science, 2011. **331**(6017): p. 555-61.
- 1020 76. Eriksson, B.J., et al., *Characterisation and localisation of the opsin protein repertoire in the brain and retinas  
1021 of a spider and an onychophoran*. BMC Evol Biol, 2013. **13**: p. 186.
- 1022 77. Hering, L. and G. Mayer, *Analysis of the opsin repertoire in the tardigrade Hypsibius dujardini provides  
1023 insights into the evolution of opsin genes in panarthropoda*. Genome Biol Evol, 2014. **6**(9): p. 2380-91.
- 1024 78. Benton, R., *Multigene Family Evolution: Perspectives from Insect Chemoreceptors*. Trends Ecol Evol, 2015.  
1025 **30**(10): p. 590-600.
- 1026 79. Joseph, R.M. and J.R. Carlson, *Drosophila Chemoreceptors: A Molecular Interface Between the Chemical  
1027 World and the Brain*. Trends Genet, 2015. **31**(12): p. 683-95.
- 1028 80. Mesquita, R.D., et al., *Genome of Rhodnius prolixus, an insect vector of Chagas disease, reveals unique  
1029 adaptations to hematophagy and parasite infection*. Proc Natl Acad Sci U S A, 2015. **112**(48): p. 14936-41.
- 1030 81. Benoit, J.B., et al., *Unique features of a global human ectoparasite identified through sequencing of the bed  
1031 bug genome*. Nat Commun, 2016. **7**: p. 10165.
- 1032 82. International Aphid Genomics, C., *Genome sequence of the pea aphid Acyrthosiphon pisum*. PLoS Biol, 2010.  
1033 **8**(2): p. e1000313.
- 1034 83. Ioannidis, P., et al., *Genomic features of the damselfly Calopteryx splendens representing a sister clade to most  
1035 insect orders*. Genome Biol Evol, 2017.
- 1036 84. Missbach, C., et al., *Evolution of insect olfactory receptors*. Elife, 2014. **3**: p. e02115.
- 1037 85. Robertson, H.M., *The Insect Chemoreceptor Superfamily Is Ancient in Animals*. Chem Senses, 2015. **40**(9): p.  
1038 609-14.
- 1039 86. Robertson, H.M., C.G. Warr, and J.R. Carlson, *Molecular evolution of the insect chemoreceptor gene  
1040 superfamily in Drosophila melanogaster*. Proc Natl Acad Sci U S A, 2003. **100 Suppl 2**: p. 14537-42.
- 1041 87. Miyamoto, T., et al., *A fructose receptor functions as a nutrient sensor in the Drosophila brain*. Cell, 2012.  
1042 **151**(5): p. 1113-25.
- 1043 88. Rytz, R., V. Croset, and R. Benton, *Ionotropic receptors (IRs): chemosensory ionotropic glutamate receptors  
1044 in Drosophila and beyond*. Insect Biochem Mol Biol, 2013. **43**(9): p. 888-97.



- 1045 89. Croset, V., et al., *A molecular and neuronal basis for amino acid sensing in the Drosophila larva*. *Sci Rep*,  
1046 2016. **6**: p. 34871.
- 1047 90. Ganguly, A., et al., *A Molecular and Cellular Context-Dependent Role for Ir76b in Detection of Amino Acid*  
1048 *Taste*. *Cell Rep*, 2017. **18**(3): p. 737-750.
- 1049 91. Enjin, A., et al., *Humidity Sensing in Drosophila*. *Curr Biol*, 2016. **26**(10): p. 1352-8.
- 1050 92. Knecht, Z.A., et al., *Distinct combinations of variant ionotropic glutamate receptors mediate thermosensation*  
1051 *and hygrosensation in Drosophila*. *Elife*, 2016. **5**.
- 1052 93. Hussain, A., et al., *Ionotropic Chemosensory Receptors Mediate the Taste and Smell of Polyamines*. *PLoS*  
1053 *Biol*, 2016. **14**(5): p. e1002454.
- 1054 94. Min, S., et al., *Dedicated olfactory neurons mediating attraction behavior to ammonia and amines in*  
1055 *Drosophila*. *Proc Natl Acad Sci U S A*, 2013. **110**(14): p. E1321-9.
- 1056 95. Ai, M., et al., *Acid sensing by the Drosophila olfactory system*. *Nature*, 2010. **468**(7324): p. 691-5.
- 1057 96. Gorter, J.A., et al., *The nutritional and hedonic value of food modulate sexual receptivity in Drosophila*  
1058 *melanogaster females*. *Sci Rep*, 2016. **6**: p. 19441.
- 1059 97. Grosjean, Y., et al., *An olfactory receptor for food-derived odours promotes male courtship in Drosophila*.  
1060 *Nature*, 2011. **478**(7368): p. 236-40.
- 1061 98. Prieto-Godino, L.L., et al., *Olfactory receptor pseudo-pseudogenes*. *Nature*, 2016. **539**(7627): p. 93-97.
- 1062 99. Prieto-Godino, L.L., et al., *Evolution of Acid-Sensing Olfactory Circuits in Drosophilids*. *Neuron*, 2017. **93**(3):  
1063 p. 661-676 e6.
- 1064 100. Koh, T.W., et al., *The Drosophila IR20a clade of ionotropic receptors are candidate taste and pheromone*  
1065 *receptors*. *Neuron*, 2014. **83**(4): p. 850-65.
- 1066 101. Stewart, S., et al., *Candidate ionotropic taste receptors in the Drosophila larva*. *Proc Natl Acad Sci U S A*,  
1067 2015. **112**(14): p. 4195-201.
- 1068 102. Simpson, S.J., G.A. Sword, and N. Lo, *Polyphenism in insects*. *Curr Biol*, 2011. **21**(18): p. R738-49.
- 1069 103. Roff, D.A., *The Evolution of Wing Dimorphism in Insects*. *Evolution*, 1986. **40**(5): p. 1009-1020.
- 1070 104. Harada, T. and K. Taneda, *Seasonal changes in alary dimorphism of a water strider, Gerris paludum insularis*  
1071 *(Motschulsky)*. *Journal of Insect Physiology*, 1989. **35**(12): p. 919-924.
- 1072 105. Vepsäläinen, K., *Determination of wing length and diapause in water-striders (gerris fabr., heteroptera)*.  
1073 *Hereditas*, 1974. **77**(2): p. 163-76.
- 1074 106. Vepsäläinen, K., *Wing Dimorphism and Diapause in Gerris: Determination and Adaptive Significance*, in  
1075 *Evolution of Insect Migration and Diapause*, H. Dingle, Editor. 1978, Springer US. p. 218-253.
- 1076 107. Suen, G., et al., *The genome sequence of the leaf-cutter ant Atta cephalotes reveals insights into its obligate*  
1077 *symbiotic lifestyle*. *PLoS Genet*, 2011. **7**(2): p. e1002007.
- 1078 108. Smith, C.R., et al., *Draft genome of the red harvester ant Pogonomyrmex barbatus*. *Proc Natl Acad Sci U S A*,  
1079 2011. **108**(14): p. 5667-72.
- 1080 109. Smith, C.D., et al., *Draft genome of the globally widespread and invasive Argentine ant (Linepithema humile)*.  
1081 *Proc Natl Acad Sci U S A*, 2011. **108**(14): p. 5673-8.
- 1082 110. Brisson, J.A., *Aphid wing dimorphisms: linking environmental and genetic control of trait variation*. *Philos*  
1083 *Trans R Soc Lond B Biol Sci*, 2010. **365**(1540): p. 605-16.
- 1084 111. Elango, N., et al., *DNA methylation is widespread and associated with differential gene expression in castes of*  
1085 *the honeybee, Apis mellifera*. *Proc Natl Acad Sci U S A*, 2009. **106**(27): p. 11206-11.
- 1086 112. Nijhout, H.F., *Development and evolution of adaptive polyphenisms*. *Evol Dev*, 2003. **5**(1): p. 9-18.
- 1087 113. Nijhout, H.F., *Insect polyphenisms and adaptation*. *American Zoologist*, 2001. **41**(6): p. 1540-1540.
- 1088 114. Xu, H.J., et al., *Two insulin receptors determine alternative wing morphs in planthoppers*. *Nature*, 2015.  
1089 **519**(7544): p. 464-7.
- 1090 115. Nijhout, H.F., *Control Mechanisms of Polyphenic Development in Insects: In polyphenic development,*  
1091 *environmental factors alter some aspects of development in an orderly and predictable way*. *Bioscience*, 1999.  
1092 **49**(3): p. 181-192.
- 1093 116. Alvarado, S., et al., *Epigenetic variation in the Egfr gene generates quantitative variation in a complex trait in*  
1094 *ants*. *Nat Commun*, 2015. **6**: p. 6513.
- 1095 117. Foret, S., et al., *DNA methylation dynamics, metabolic fluxes, gene splicing, and alternative phenotypes in*  
1096 *honey bees*. *Proc Natl Acad Sci U S A*, 2012. **109**(13): p. 4968-73.
- 1097 118. Li-Byarlay, H., et al., *RNA interference knockdown of DNA methyl-transferase 3 affects gene alternative*  
1098 *splicing in the honey bee*. *Proc Natl Acad Sci U S A*, 2013. **110**(31): p. 12750-5.
- 1099 119. Kucharski, R., et al., *Nutritional control of reproductive status in honeybees via DNA methylation*. *Science*,  
1100 2008. **319**(5871): p. 1827-30.
- 1101 120. Herb, B.R., et al., *Reversible switching between epigenetic states in honeybee behavioral subcastes*. *Nat*  
1102 *Neurosci*, 2012. **15**(10): p. 1371-3.
- 1103 121. Glastad, K.M., et al., *DNA methylation in insects: on the brink of the epigenomic era*. *Insect Mol Biol*, 2011.  
1104 **20**(5): p. 553-65.

- 1105 122. Bewick, A.J., et al., *Evolution of DNA Methylation across Insects*. Mol Biol Evol, 2017. **34**(3): p. 654-665.
- 1106 123. Walsh, T.K., et al., *A functional DNA methylation system in the pea aphid, Acyrthosiphon pisum*. Insect Mol Biol, 2010. **19 Suppl 2**: p. 215-28.
- 1107
- 1108 124. Vandegehuchte, M.B., et al., *Occurrence of DNA methylation in Daphnia magna and influence of multigeneration Cd exposure*. Environ Int, 2009. **35**(4): p. 700-6.
- 1109
- 1110 125. Terrapon, N., et al., *Molecular traces of alternative social organization in a termite genome*. Nat Commun, 2014. **5**: p. 3636.
- 1111
- 1112 126. Bonasio, R., et al., *Genomic comparison of the ants Camponotus floridanus and Harpegnathos saltator*. Science, 2010. **329**(5995): p. 1068-71.
- 1113
- 1114 127. Wang, Y., et al., *Functional CpG methylation system in a social insect*. Science, 2006. **314**(5799): p. 645-7.
- 1115 128. Duncan, E.J., P.D. Gluckman, and P.K. Dearden, *Epigenetics, plasticity, and evolution: How do we link epigenetic change to phenotype?* J Exp Zool B Mol Dev Evol, 2014. **322**(4): p. 208-20.
- 1116
- 1117 129. Andersen, N.M., et al., *The Evolution of Wing Polymorphism in Water Striders (Gerridae): A Phylogenetic Approach*. Oikos, 1993. **67**(3): p. 433-443.
- 1118
- 1119 130. Andersen, N.M., *The semiaquatic bugs*. ENTOMONOGRAPH, ed. N.M.A.L. Lyneborg. Vol. 3. 1982, Klampenborg – Denmark: SCANDINAVIAN SCIENCE PRESS LTD.
- 1120
- 1121 131. Fairbairn, D.J. and E. King, *Why do Californian striders fly?* J Evol Biol, 2009. **22**(1): p. 36-49.
- 1122 132. Arnqvist, G. and L. Rowe, *Sexual Conflict*. 2005: Princeton University Press.
- 1123 133. McKay, D.J., et al., *Interrogating the function of metazoan histones using engineered gene clusters*. Dev Cell, 2015. **32**(3): p. 373-86.
- 1124
- 1125 134. Conrad, T., et al., *The MOF chromobarrel domain controls genome-wide H4K16 acetylation and spreading of the MSL complex*. Dev Cell, 2012. **22**(3): p. 610-24.
- 1126
- 1127 135. Pushpavalli, S.N., et al., *Drosophila MOF controls Checkpoint protein2 and regulates genomic stability during early embryogenesis*. BMC Mol Biol, 2013. **14**: p. 1.
- 1128
- 1129 136. Rider, S.D., Jr., D.G. Srinivasan, and R.S. Hilgarth, *Chromatin-remodelling proteins of the pea aphid, Acyrthosiphon pisum (Harris)*. Insect Mol Biol, 2010. **19 Suppl 2**: p. 201-14.
- 1130
- 1131 137. Furuyama, T., et al., *SIR2 is required for polycomb silencing and is associated with an E(Z) histone methyltransferase complex*. Curr Biol, 2004. **14**(20): p. 1812-21.
- 1132
- 1133 138. Rogina, B. and S.L. Helfand, *Sir2 mediates longevity in the fly through a pathway related to calorie restriction*. Proc Natl Acad Sci U S A, 2004. **101**(45): p. 15998-6003.
- 1134
- 1135 139. Tissenbaum, H.A. and L. Guarente, *Increased dosage of a sir-2 gene extends lifespan in Caenorhabditis elegans*. Nature, 2001. **410**(6825): p. 227-30.
- 1136
- 1137 140. List, O., et al., *Overexpression of grappa encoding a histone methyltransferase enhances stress resistance in Drosophila*. Hereditas, 2009. **146**(1): p. 19-28.
- 1138
- 1139 141. Bi, J.L. and G.W. Felton, *Foliar oxidative stress and insect herbivory: Primary compounds, secondary metabolites, and reactive oxygen species as components of induced resistance*. J Chem Ecol, 1995. **21**(10): p. 1511-30.
- 1140
- 1141 142. Mittapalli, O., J.J. Neal, and R.H. Shukle, *Antioxidant defense response in a galling insect*. Proc Natl Acad Sci U S A, 2007. **104**(6): p. 1889-94.
- 1142
- 1143 143. Pardini, R.S., *Toxicity of oxygen from naturally occurring redox-active pro-oxidants*. Arch Insect Biochem Physiol, 1995. **29**(2): p. 101-18.
- 1144
- 1145 144. Corona, M. and G.E. Robinson, *Genes of the antioxidant system of the honey bee: annotation and phylogeny*. Insect Mol Biol, 2006. **15**(5): p. 687-701.
- 1146
- 1147 145. Felton, G.W. and C.B. Summers, *Antioxidant systems in insects*. Arch Insect Biochem Physiol, 1995. **29**(2): p. 187-97.
- 1148
- 1149
- 1150 146. Shi, G.Q., Q.Y. Yu, and Z. Zhang, *Annotation and evolution of the antioxidant genes in the silkworm, Bombyx mori*. Arch Insect Biochem Physiol, 2012. **79**(2): p. 87-103.
- 1151
- 1152 147. Gnerre, S., et al., *High-quality draft assemblies of mammalian genomes from massively parallel sequence data*. Proc Natl Acad Sci U S A, 2011. **108**(4): p. 1513-8.
- 1153
- 1154 148. Cantarel, B.L., et al., *MAKER: an easy-to-use annotation pipeline designed for emerging model organism genomes*. Genome Res, 2008. **18**(1): p. 188-96.
- 1155
- 1156 149. Stanke, M., et al., *Using native and syntenically mapped cDNA alignments to improve de novo gene finding*. Bioinformatics, 2008. **24**(5): p. 637-44.
- 1157
- 1158 150. Korf, I., *Gene finding in novel genomes*. BMC Bioinformatics, 2004. **5**: p. 59.
- 1159
- 1160 151. Gramates, L.S., et al., *FlyBase at 25: looking to the future*. Nucleic Acids Res, 2017. **45**(D1): p. D663-D671.
- 1161
- 1162 152. Willis, J.H., *Structural cuticular proteins from arthropods: annotation, nomenclature, and sequence characteristics in the genomics era*. Insect Biochem Mol Biol, 2010. **40**(3): p. 189-204.
- 1163
- 1164 153. Ioannidou, Z.S., et al., *CutProtFam-Pred: detection and classification of putative structural cuticular proteins from sequence alone, based on profile hidden Markov models*. Insect Biochem Mol Biol, 2014. **52**: p. 51-9.
154. Bird, A.P., *DNA methylation and the frequency of CpG in animal DNA*. Nucleic Acids Res, 1980. **8**(7): p.

- 1165 1499-504.
- 1166 155. Weber, M., et al., *Distribution, silencing potential and evolutionary impact of promoter DNA methylation in*  
1167 *the human genome*. Nat Genet, 2007. **39**(4): p. 457-66.
- 1168 156. Wang, L., et al., *BeetleBase: the model organism database for Tribolium castaneum*. Nucleic Acids Res, 2007.  
1169 **35**(Database issue): p. D476-9.
- 1170 157. Misra, J.R., et al., *Transcriptional regulation of xenobiotic detoxification in Drosophila*. Genes Dev, 2011.  
1171 **25**(17): p. 1796-806.
- 1172 158. Wallace, I.M., et al., *M-Coffee: combining multiple sequence alignment methods with T-Coffee*. Nucleic Acids  
1173 Res, 2006. **34**(6): p. 1692-9.
- 1174 159. Capella-Gutierrez, S., J.M. Silla-Martinez, and T. Gabaldon, *trimAl: a tool for automated alignment trimming*  
1175 *in large-scale phylogenetic analyses*. Bioinformatics, 2009. **25**(15): p. 1972-3.
- 1176 160. Tamura, K., et al., *MEGA6: Molecular Evolutionary Genetics Analysis version 6.0*. Mol Biol Evol, 2013.  
1177 **30**(12): p. 2725-9.
- 1178 161. Jones, D.T., W.R. Taylor, and J.M. Thornton, *The rapid generation of mutation data matrices from protein*  
1179 *sequences*. Comput Appl Biosci, 1992. **8**(3): p. 275-82.
- 1180 162. Norga, K.K., et al., *Quantitative analysis of bristle number in Drosophila mutants identifies genes involved in*  
1181 *neural development*. Curr Biol, 2003. **13**(16): p. 1388-96.
- 1182 163. Gao, N., R.G. Foster, and J. Hardie, *Two opsin genes from the vetch aphid, Megoura viciae*. Insect Mol Biol,  
1183 2000. **9**(2): p. 197-202.
- 1184 164. Wakakuwa, M., et al., *Physiological basis of phototaxis to near-infrared light in Nephotettix cincticeps*. J  
1185 Comp Physiol A Neuroethol Sens Neural Behav Physiol, 2014. **200**(6): p. 527-36.
- 1186 165. Döring, T.F., et al., *Spectral sensitivity of the green photoreceptor of winged pea aphids*. Physiological  
1187 Entomology, 2011. **36**(4): p. 392-396.
- 1188 166. Lyko, F., et al., *The honey bee epigenomes: differential methylation of brain DNA in queens and workers*.  
1189 PLoS Biol, 2010. **8**(11): p. e1000506.
- 1190
